# Supplementary material for: An Approach toward 17-Arylsubstituted Marginatafuran-Type Isospongian Diterpenoids via a Palladium-Catalyzed Heck–Suzuki Cascade Reaction of 16-Bromolambertianic Acid
Source: MDPI journal article supplement (doi:10.3390/molecules27092643), 2022-04-20

An approach toward 17-arylsubstituted marginatafuran-type isospongian diterpenoids *via* a palladium-catalyzed Heck–Suzuki cascade reaction of 16-bromolambertianic acid

Yurii V. Kharitonov<sup>a</sup> and Elvira E. Shults<sup>\*a</sup>

*<sup>a</sup>Laboratory of Medicinal Chemistry, Novosibirsk Institute of Organic Chemistry, Siberian Branch of the Russian Academy of Sciences, Lavrentyev Ave, 9, 630090 Novosibirsk, Russia;*

*E-mail: schultz@nioch.nsc.ru*

### **Supporting Information**

Figures S1-S46 NMR <sup>1</sup>H and <sup>13</sup>C spectra of compounds **5**, **7a-j**, **8b,c,d,j**, **9-12**, **13a-c**, **14a**.

**(1*S*,4*aR*,5*S*,8*aR*)-5-(2-(2-bromofuran-3-yl)ethyl)-1,4*a*-dimethyl-6-methylenedecahydronaphthalene-1-carboxylic acid (**5**)** (<sup>1</sup>H NMR, 400 MHz, CDCl<sub>3</sub>)

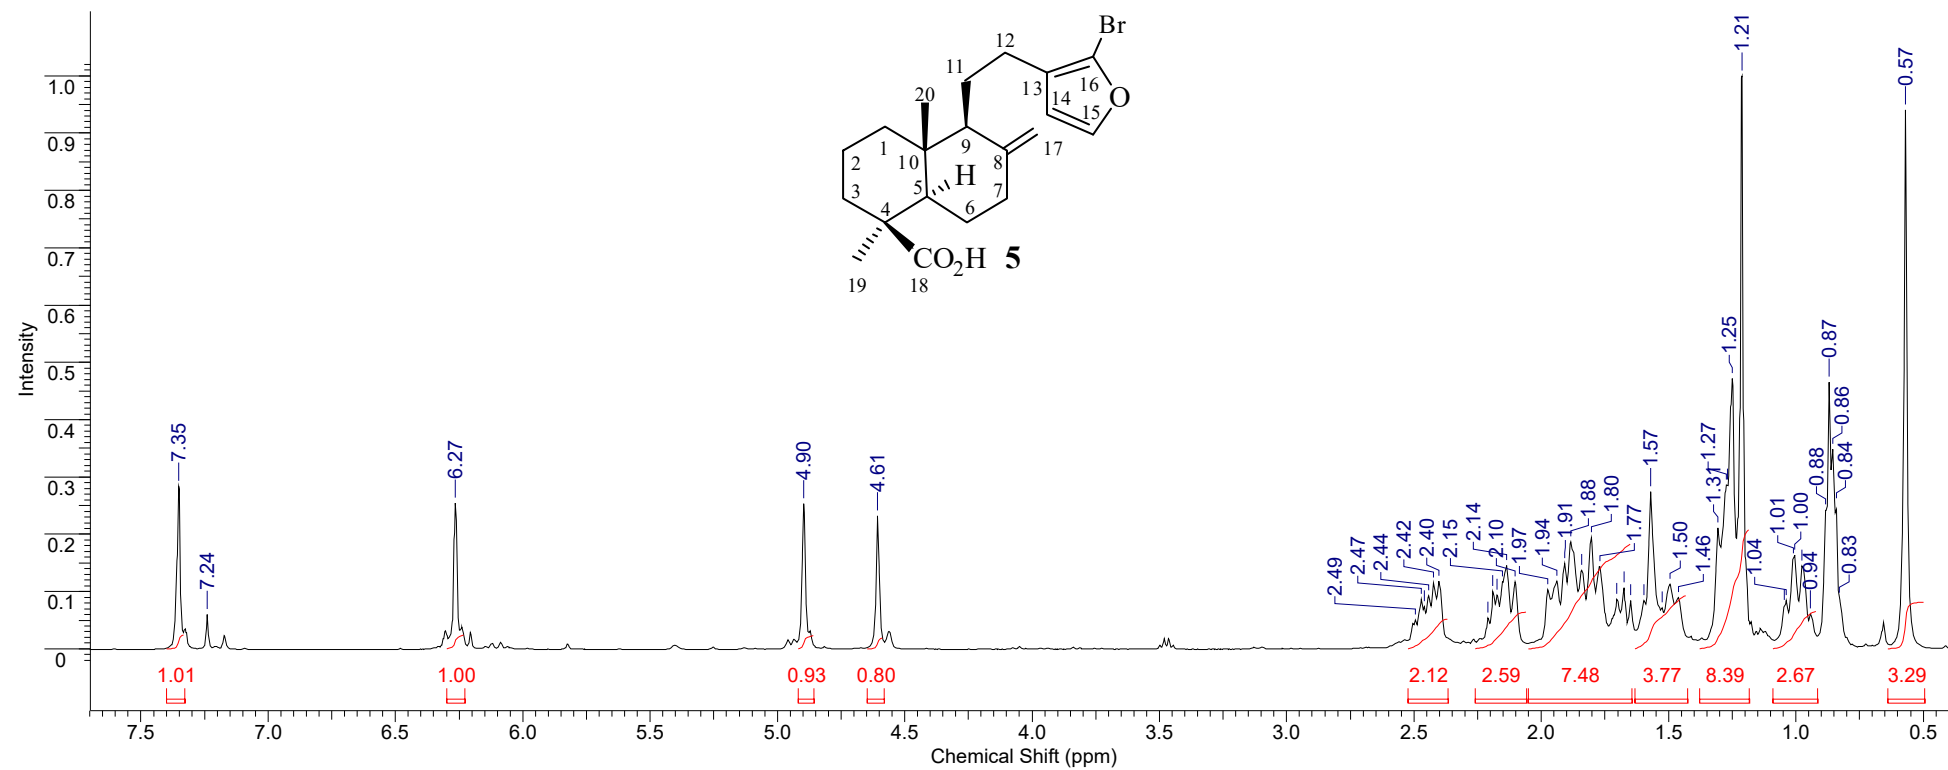

***(1S,4aR,5S,8aR)-5-(2-(2-bromofuran-3-yl)ethyl)-1,4a-dimethyl-6-methylenedecahydronaphthalene-1-carboxylic acid (5).***

(<sup>13</sup>C NMR, 126 MHz, CDCl<sub>3</sub>)

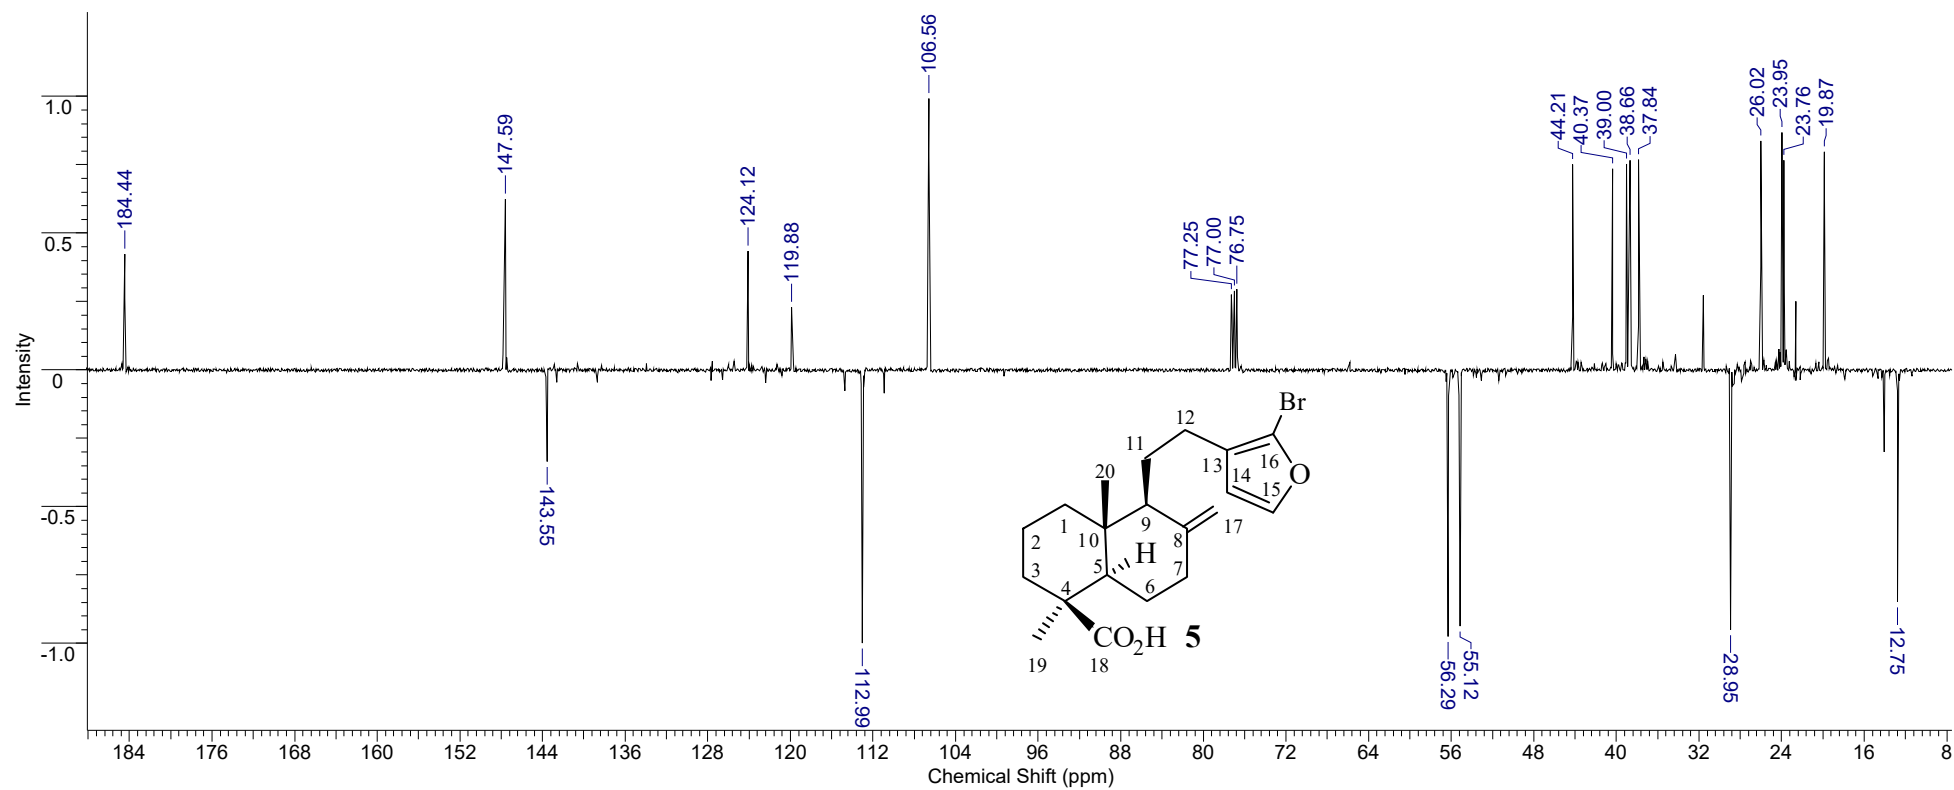

**(3*b*S,5*a*R,6*S*,9*a*R,9*b*R)-3*b*-benzyl-6,9*a*-dimethyl-3*b*,4,5,5*a*,6,7,8,9,9*a*,9*b*,10,11-dodecahydrophenanthro[1,2-*b*]furan-6-carboxylic acid (**7a**)** ( $^1\text{H}$  NMR, 600 MHz,  $\text{CDCl}_3$ )

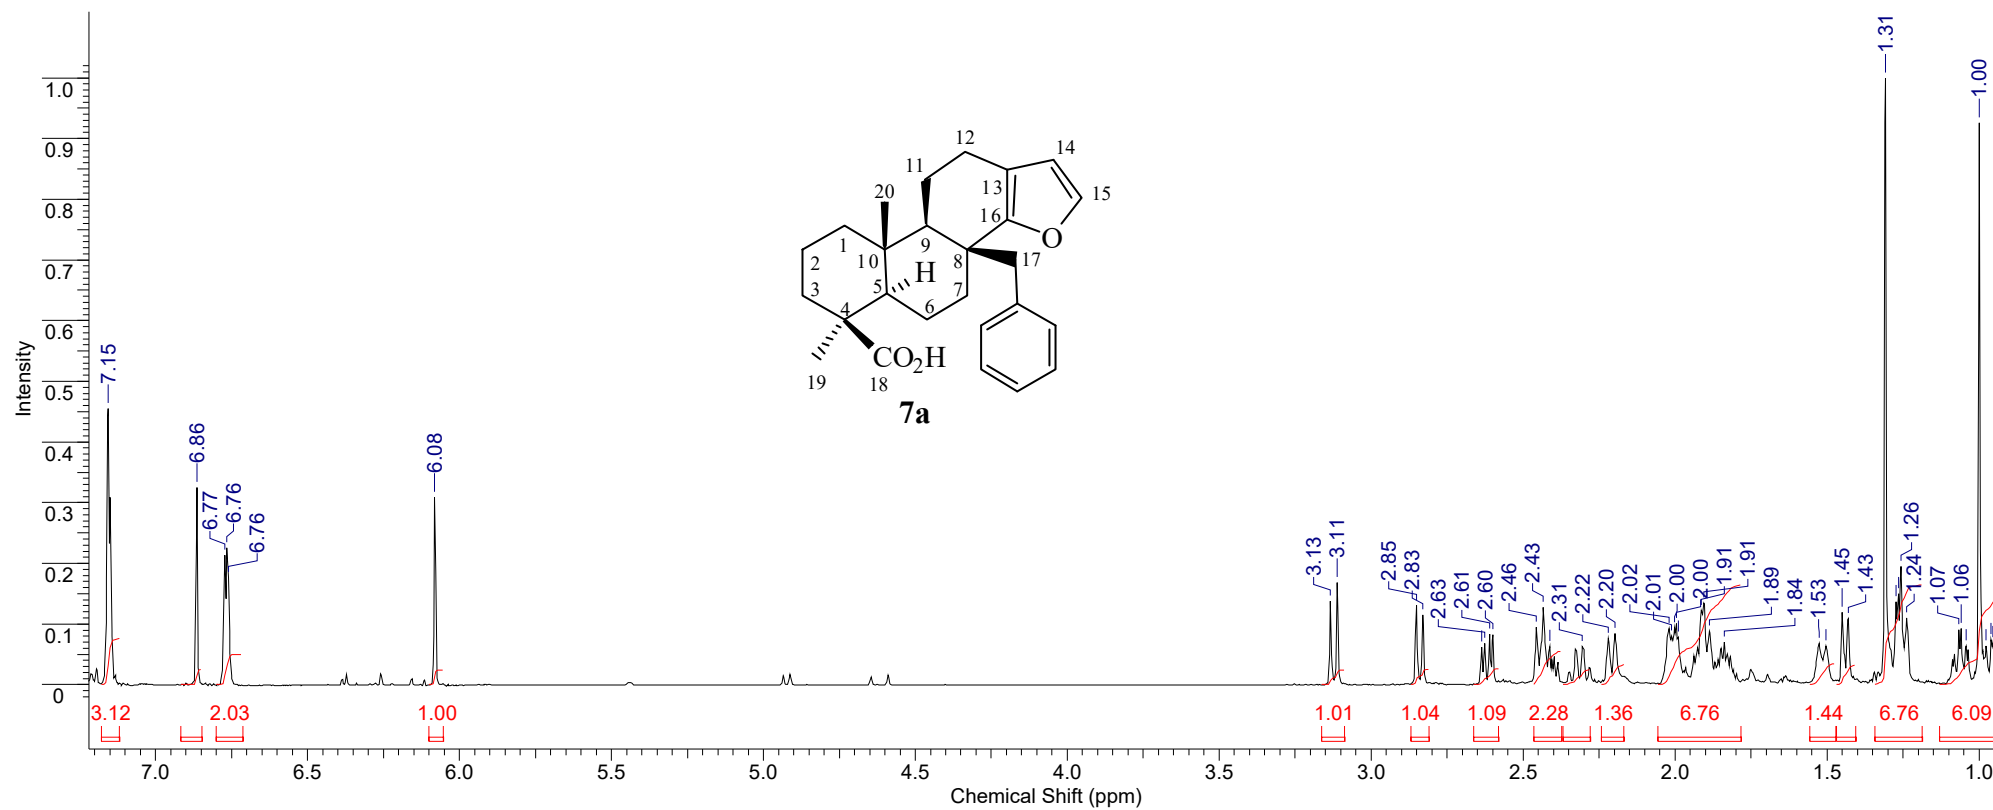

***(3bS,5aR,6S,9aR,9bR)*-3*b*-benzyl-6,9*a*-dimethyl-3*b*,4,5,5*a*,6,7,8,9,9*a*,9*b*,10,11-dodecahydrophenanthro[1,2-*b*]furan-6-carboxylic acid (**7a**)**

(<sup>13</sup>C NMR, 151 MHz, CDCl<sub>3</sub>)

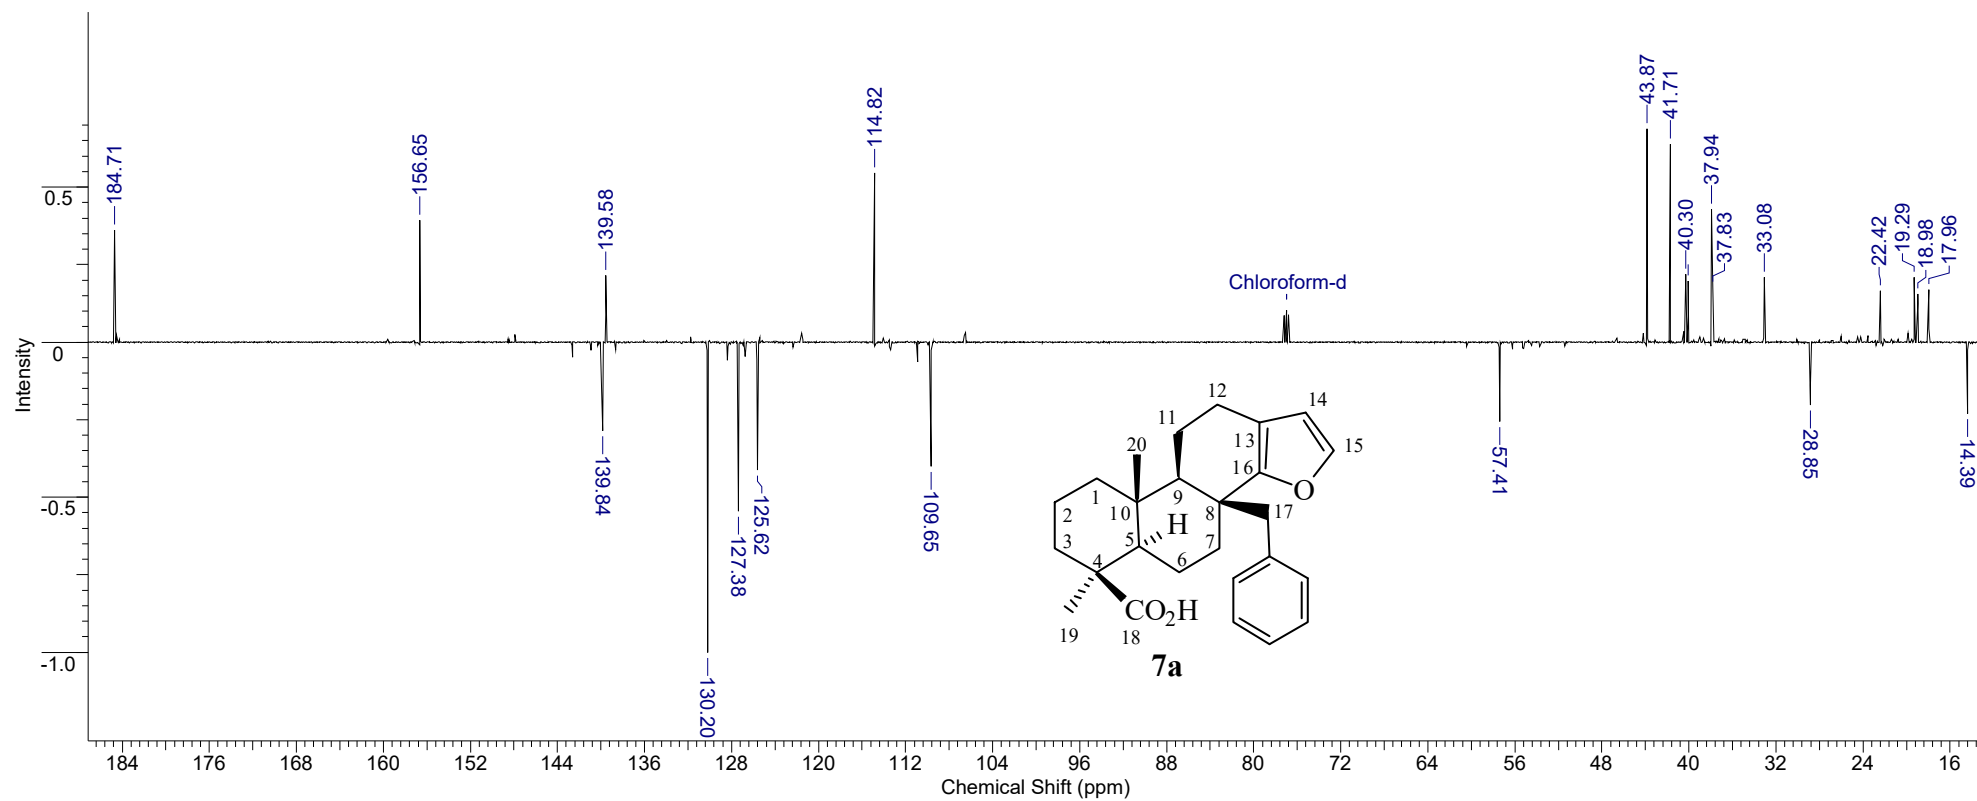

***(3bS,5aR,6S,9aR,9bR)*-3b-(2-fluorobenzyl)-6,9a-dimethyl-3b,4,5,5a,6,7,8,9,9a,9b,10,11-dodecahydrophenanthro[1,2-b]furan-6-carboxylic acid (**7b**)**

(<sup>1</sup>H NMR, 400 MHz, CDCl<sub>3</sub>)

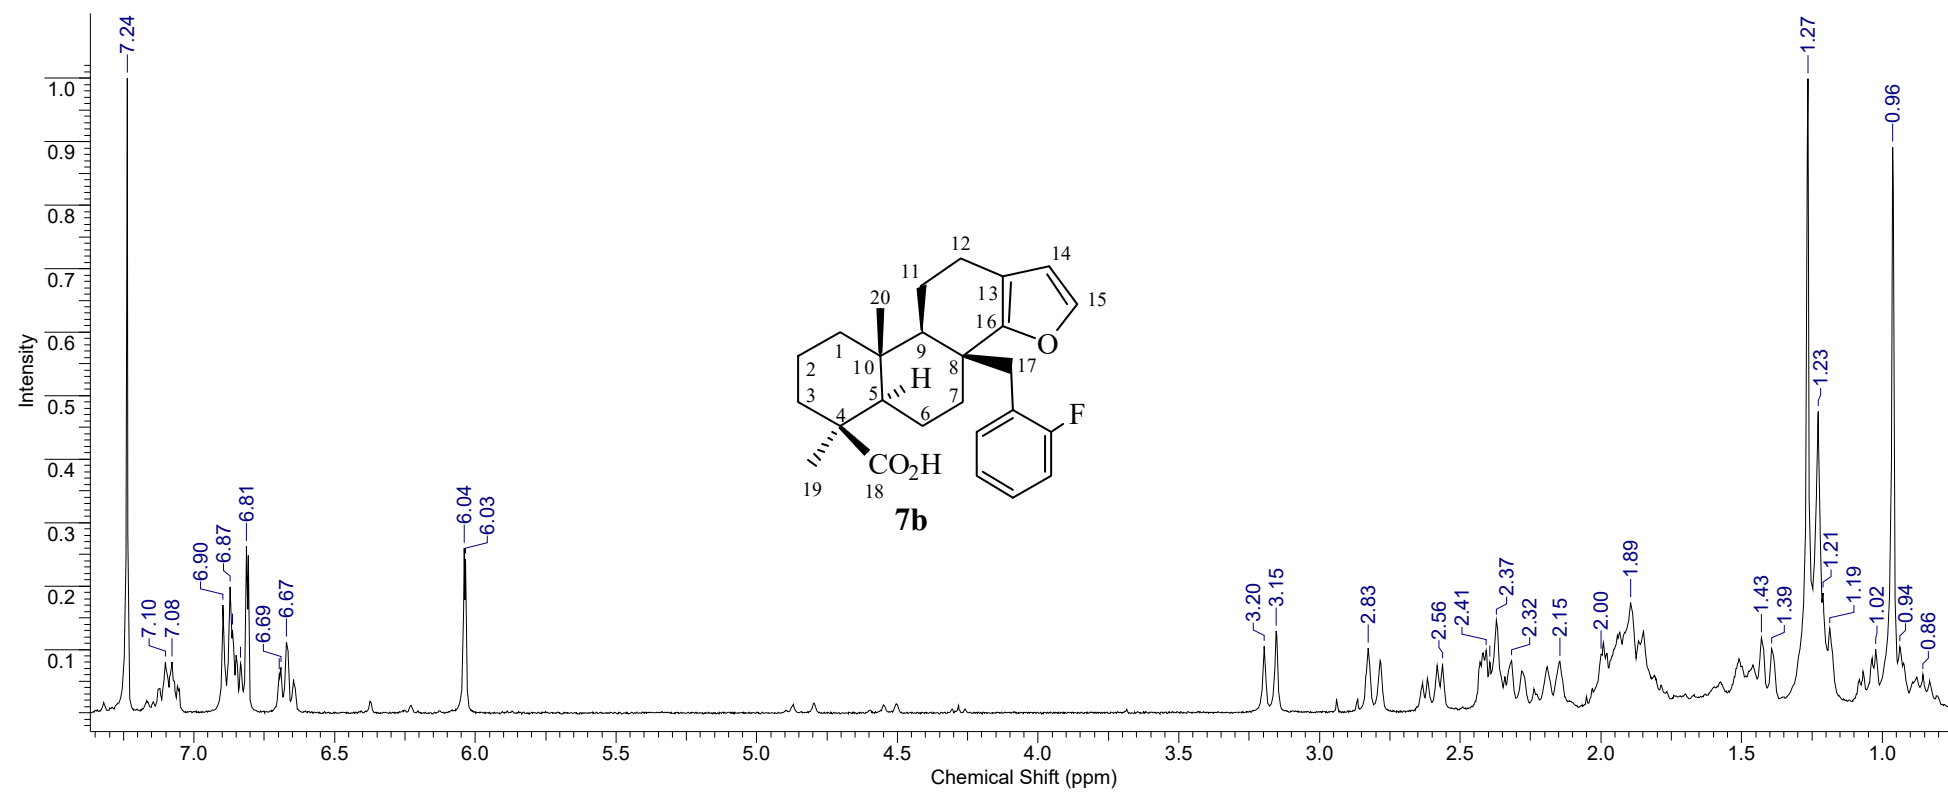

**(3*bS*,5*aR*,6*S*,9*aR*,9*bR*)-3*b*-(2-fluorobenzyl)-6,9*a*-dimethyl-3*b*,4,5,5*a*,6,7,8,9,9*a*,9*b*,10,11-dodecahydrophenanthro[1,2-*b*]furan-6-carboxylic acid (7*b*)**

(<sup>13</sup>C NMR, 75 MHz, CDCl<sub>3</sub>)

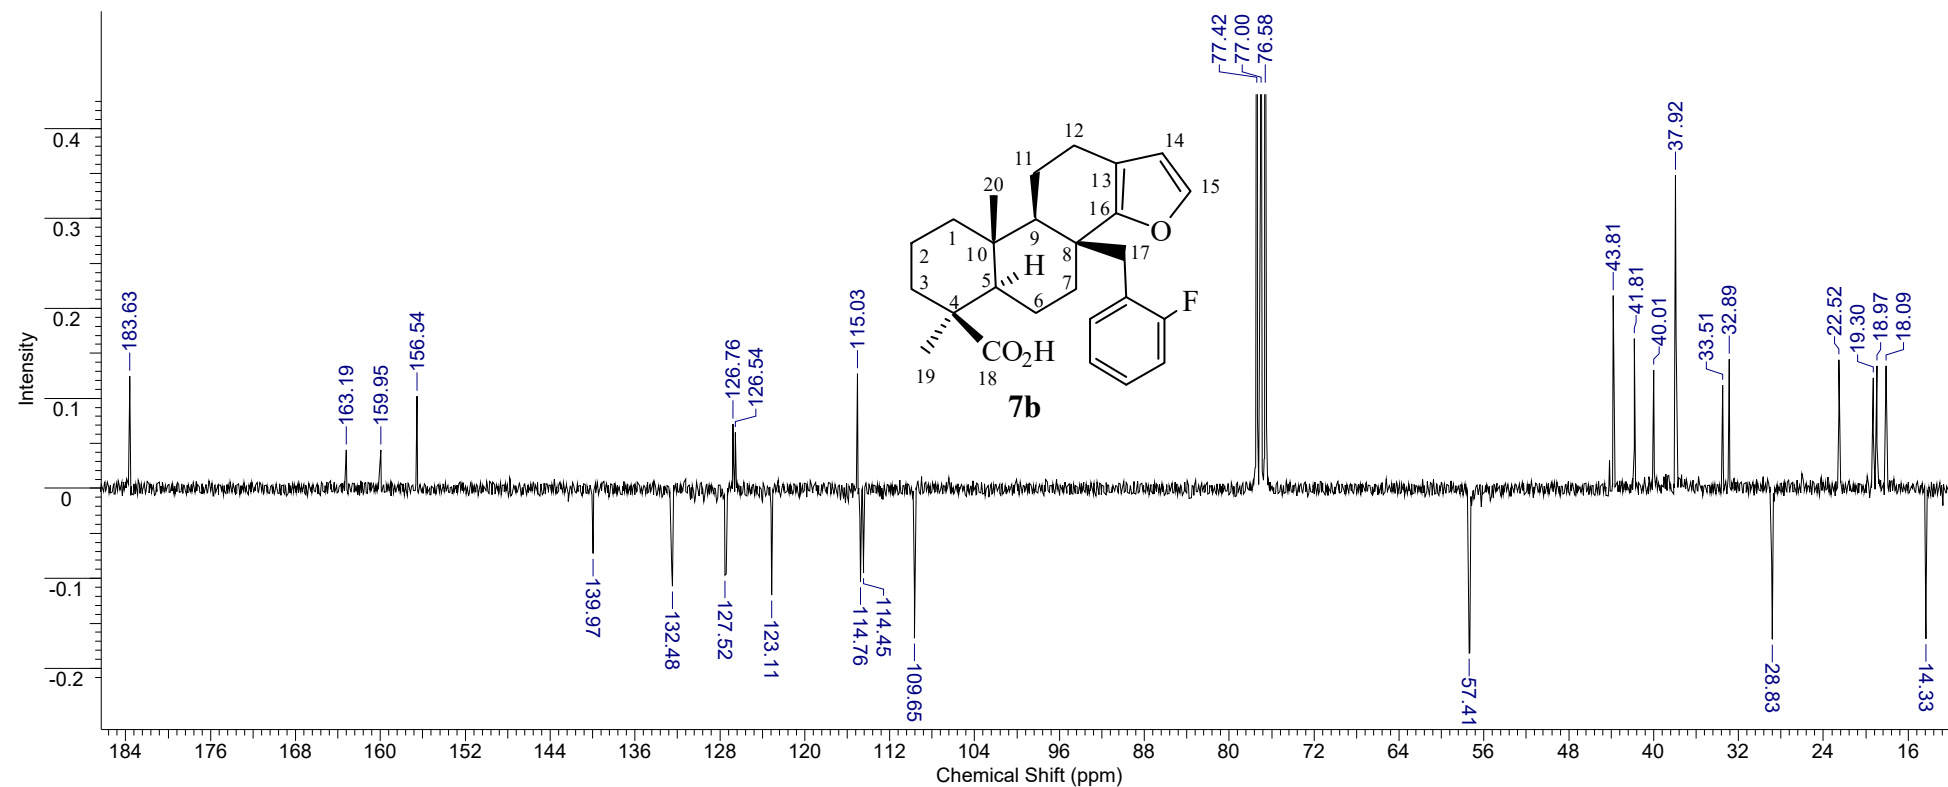

**(1S,4aR,5S,8aR)-5-(2-(2-(2-fluorophenyl)furan-3-yl)ethyl)-1,4a-dimethyl-6-methylenedecahydronaphthalene-1-carboxylic acid (8b)**

(<sup>1</sup>H NMR, 400 MHz, CDCl<sub>3</sub>)

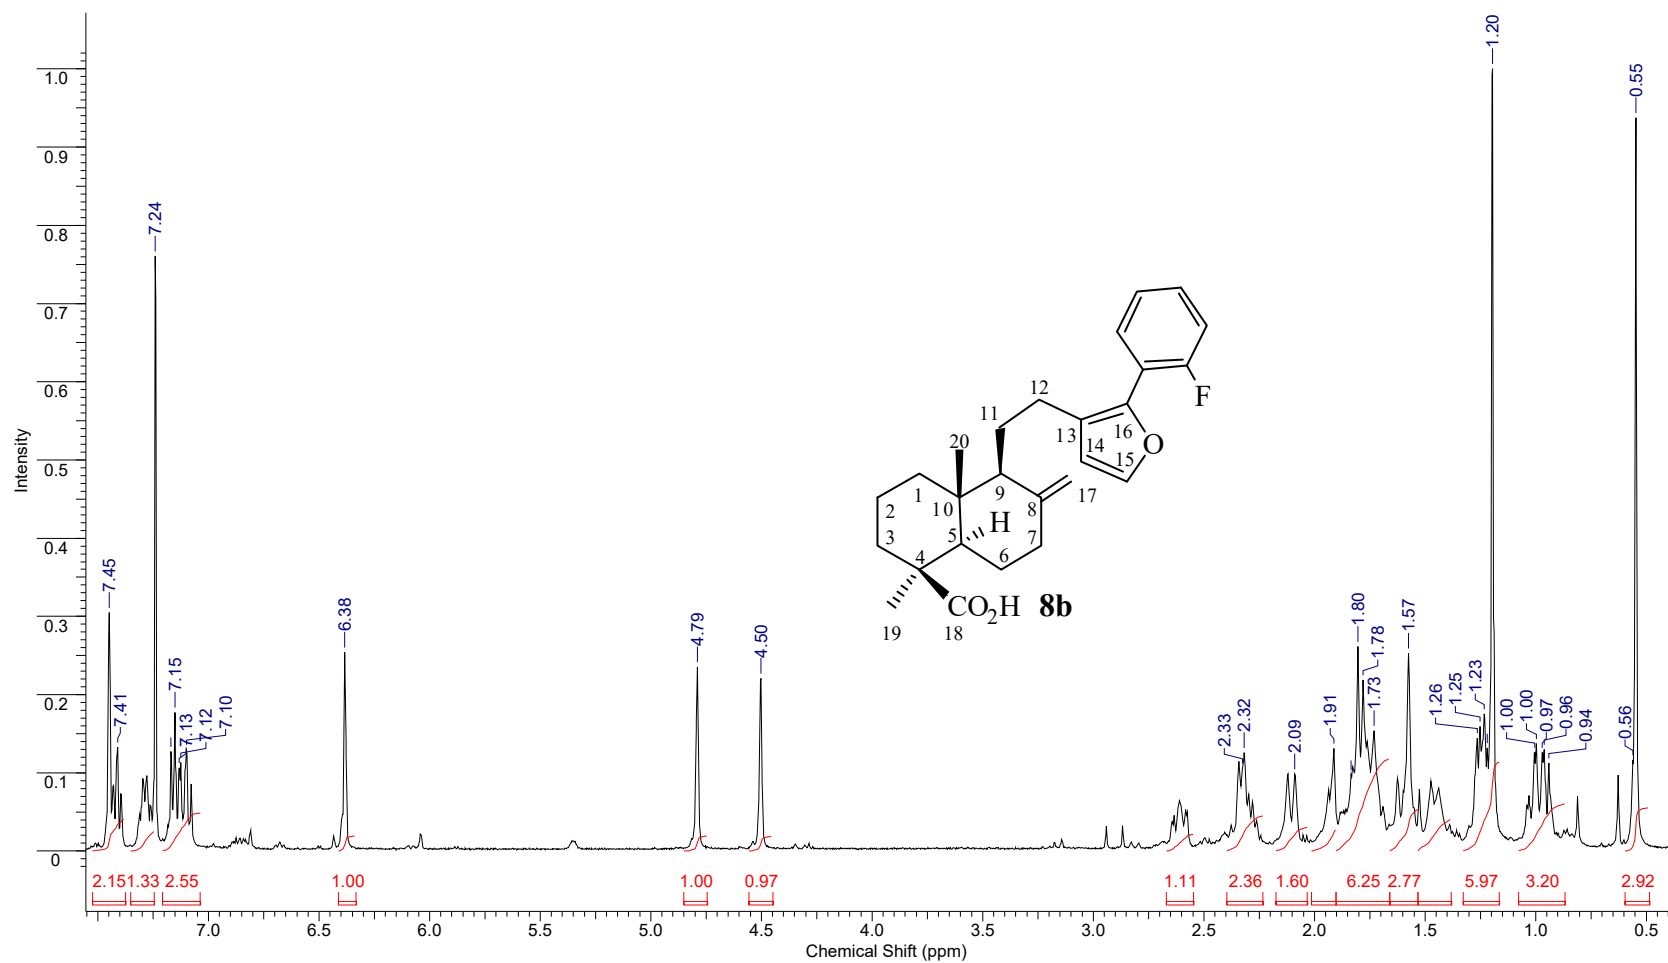



**(1*S*,4*aR*,5*S*,8*aR*)-5-(2-(2-(2-fluorophenyl)furan-3-yl)ethyl)-1,4*a*-dimethyl-6-methylenedecahydronaphthalene-1-carboxylic acid (8b)**

(<sup>13</sup>C NMR, 126 MHz, CDCl<sub>3</sub>)

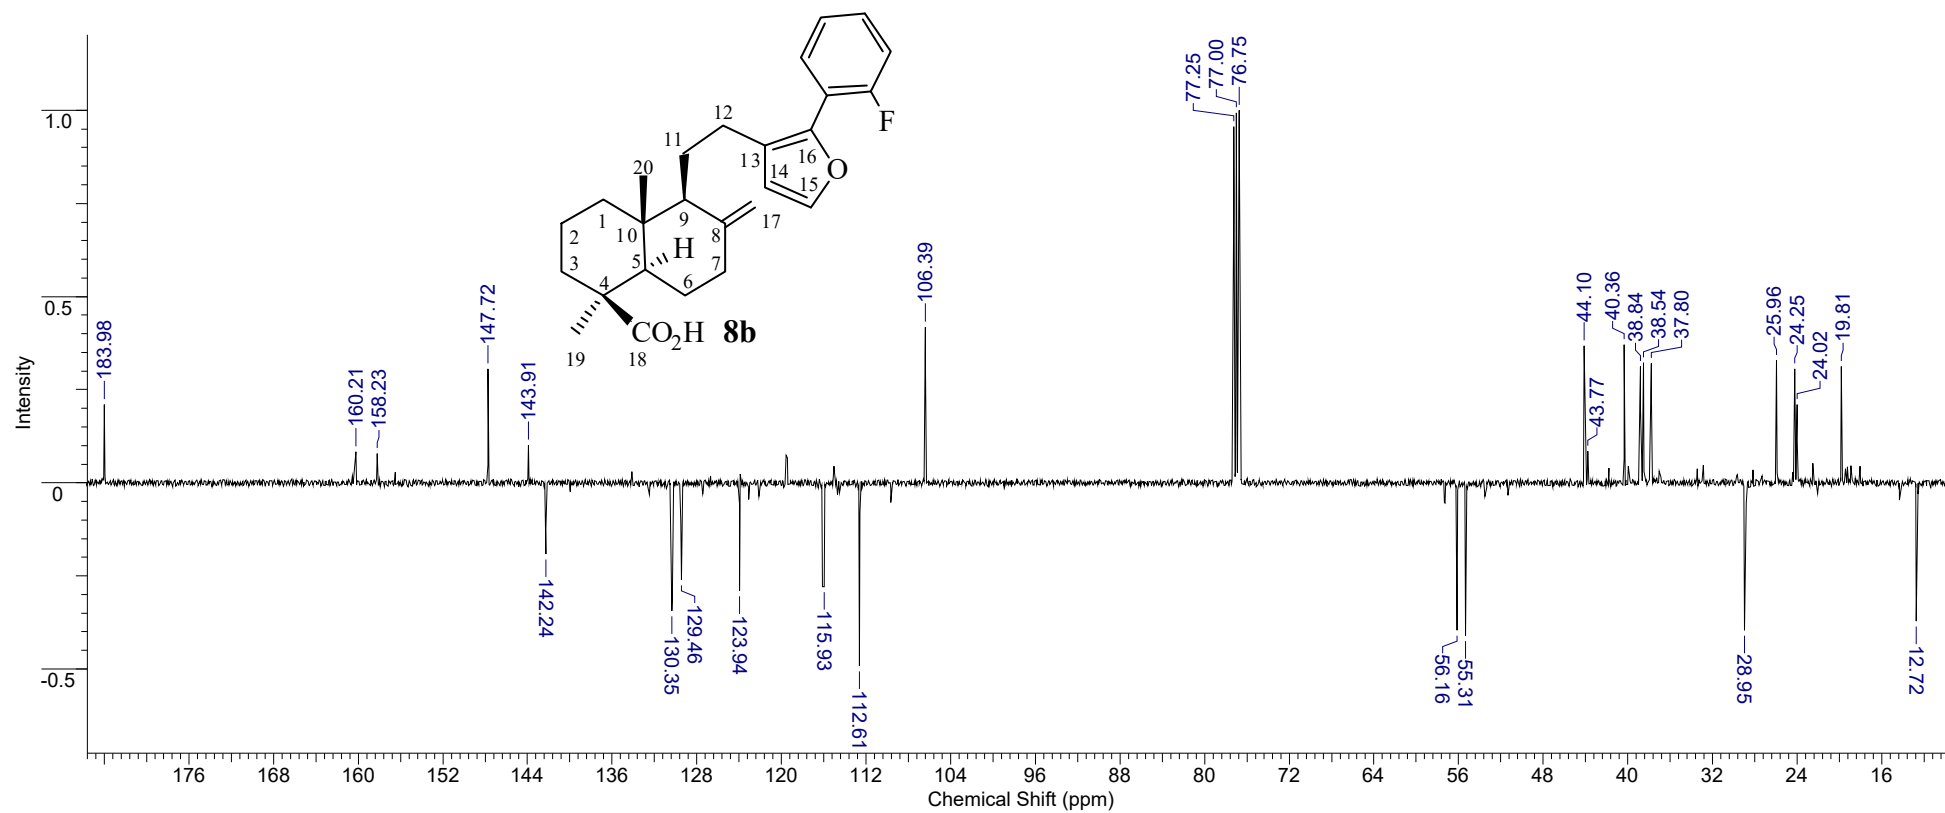

**(3*bS*,5*aR*,6*S*,9*aR*,9*bR*)-3*b*-(4-fluorobenzyl)-6,9*a*-dimethyl-3*b*,4,5,5*a*,6,7,8,9,9*a*,9*b*,10,11-dodecahydrophenanthro[1,2-*b*]furan-6-carboxylic acid (7*c*)**

(<sup>1</sup>H NMR, 400 MHz, CDCl<sub>3</sub>)

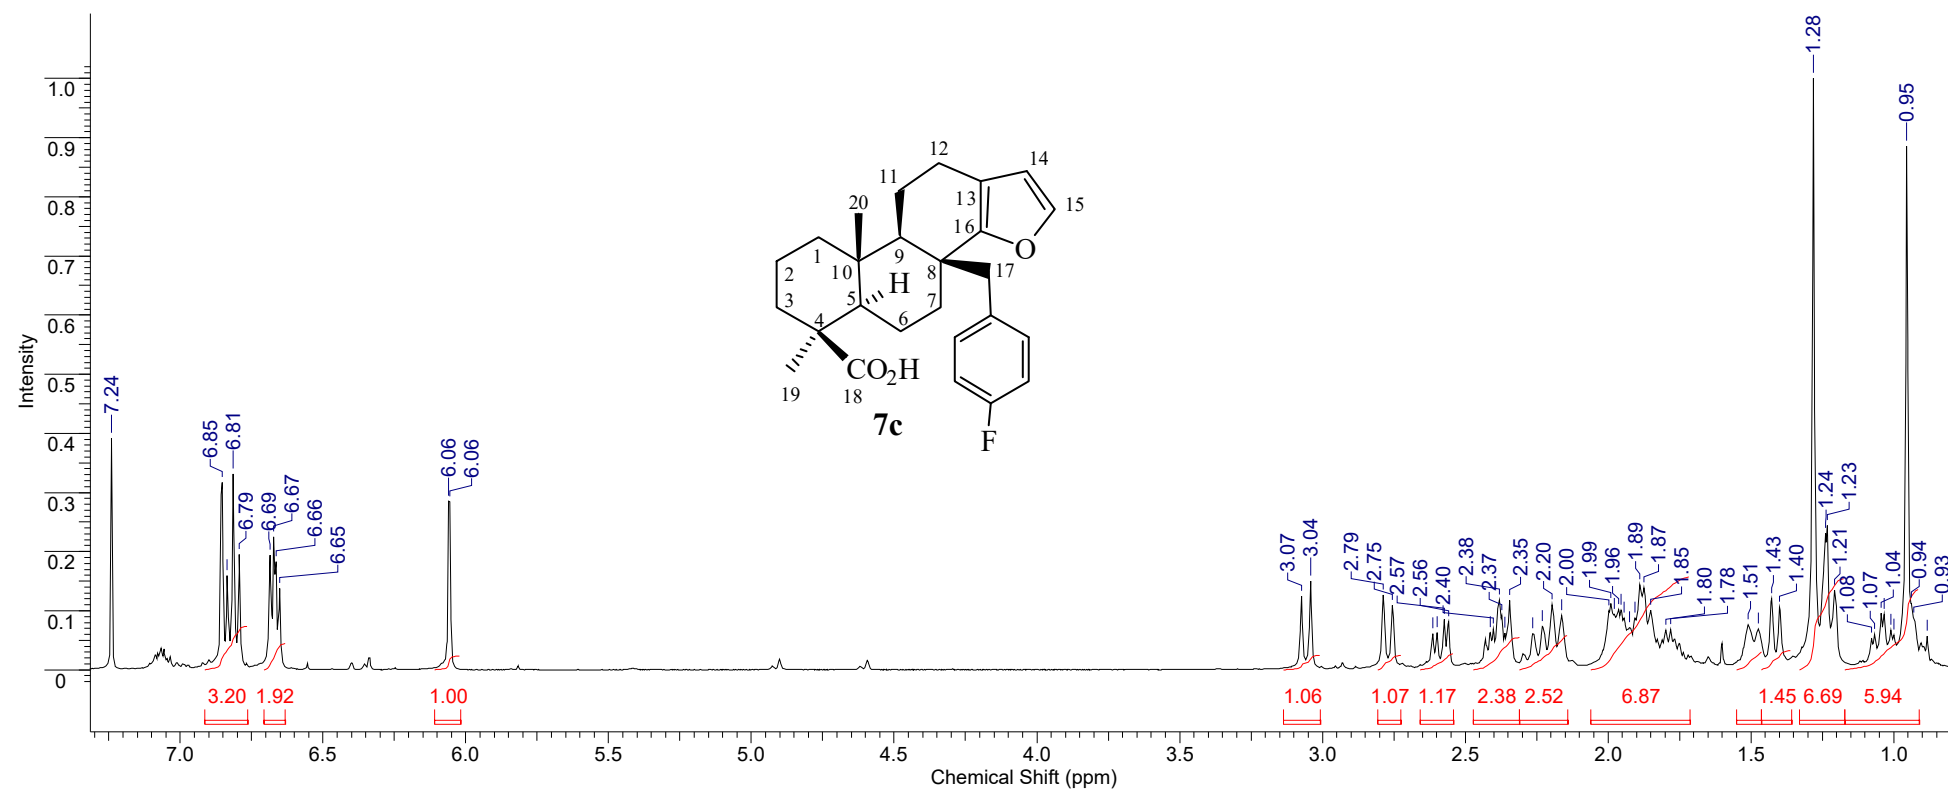

**(3*b*S,5*a*R,6*S*,9*a*R,9*b*R)-3*b*-(4-fluorobenzyl)-6,9*a*-dimethyl-3*b*,4,5,5*a*,6,7,8,9,9*a*,9*b*,10,11-dodecahydrophenanthro[1,2-*b*]furan-6-carboxylic acid (7*c*)**

(<sup>13</sup>C NMR, 126 MHz, CDCl<sub>3</sub>)

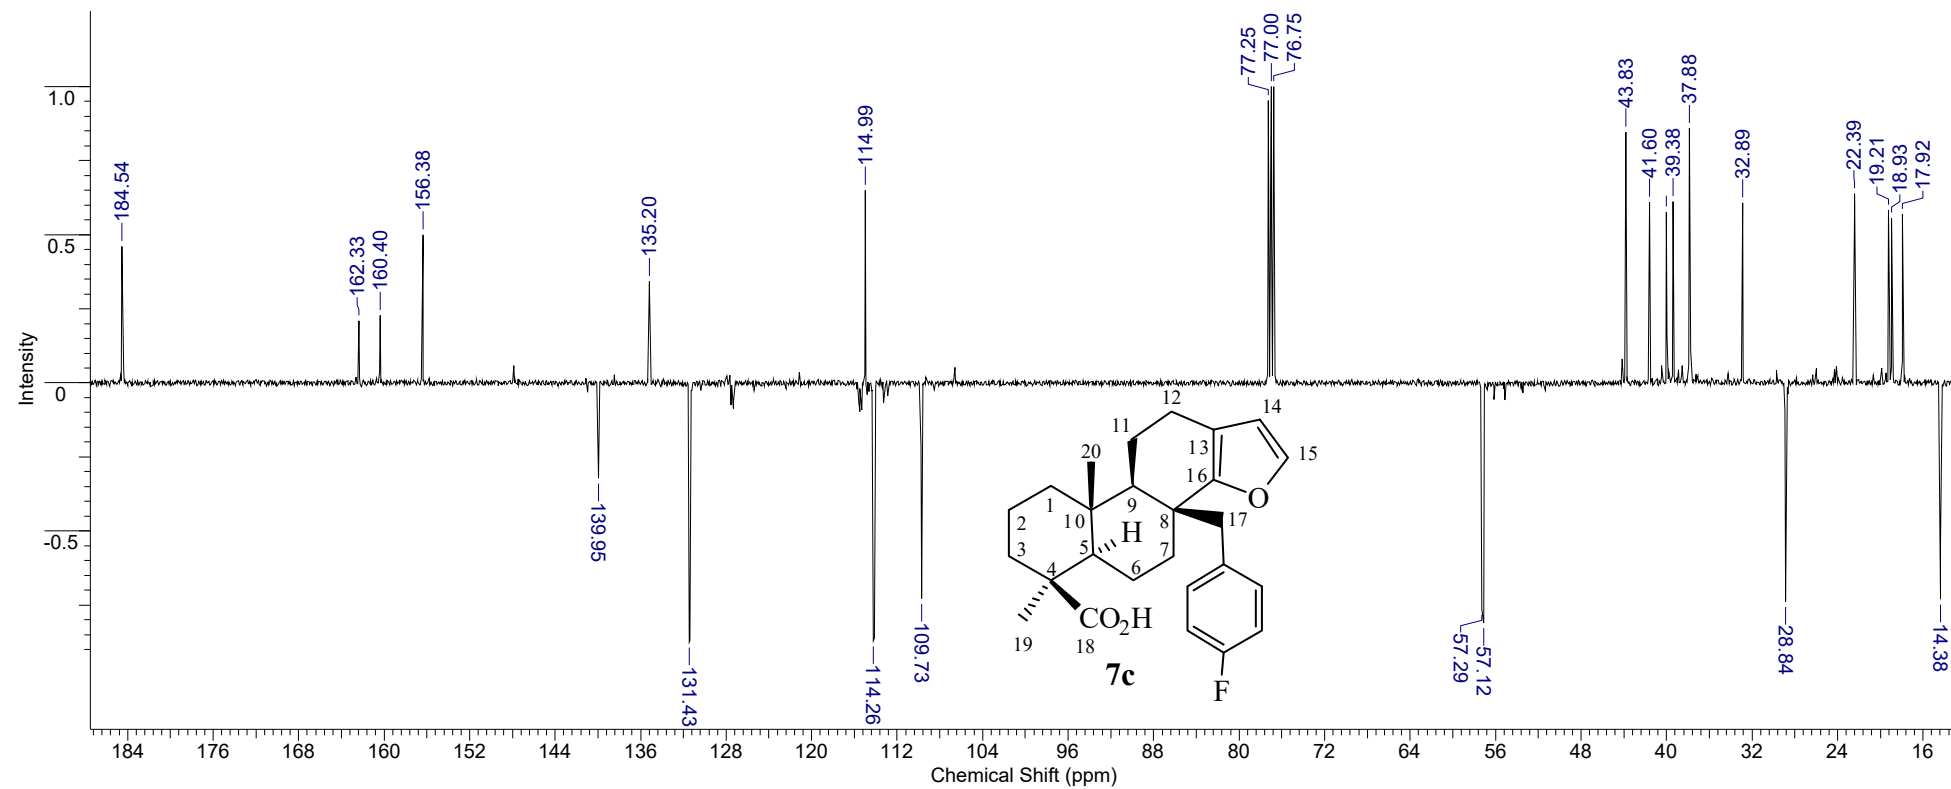

*(1S,4aR,5S,8aR)-5-(2-(2-(5-fluorophenyl)furan-3-yl)ethyl)-1,4a-dimethyl-6-methylenedecahydronaphthalene-1-carboxylic acid (8c)*

(<sup>1</sup>H NMR, 400 MHz, CDCl<sub>3</sub>)

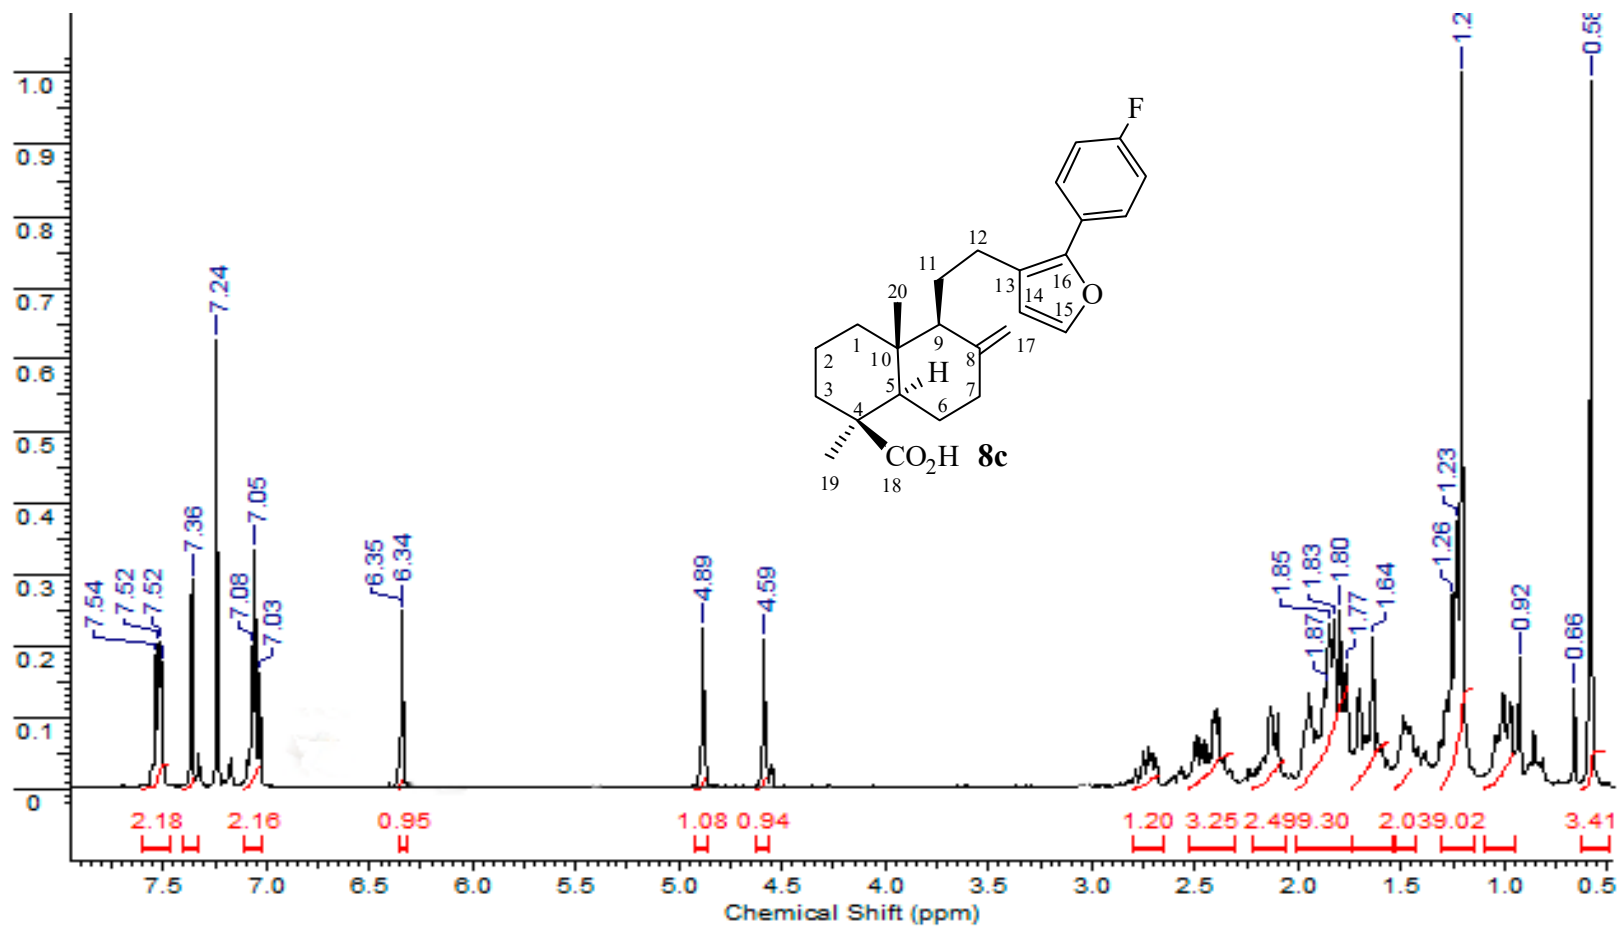

*(1S,4aR,5S,8aR)-5-(2-(2-(5-fluorophenyl)furan-3-yl)ethyl)-1,4a-dimethyl-6-methylenedecahydronaphthalene-1-carboxylic acid (8c)*

( $^{13}\text{C}$  NMR, 75 MHz,  $\text{CDCl}_3$ )

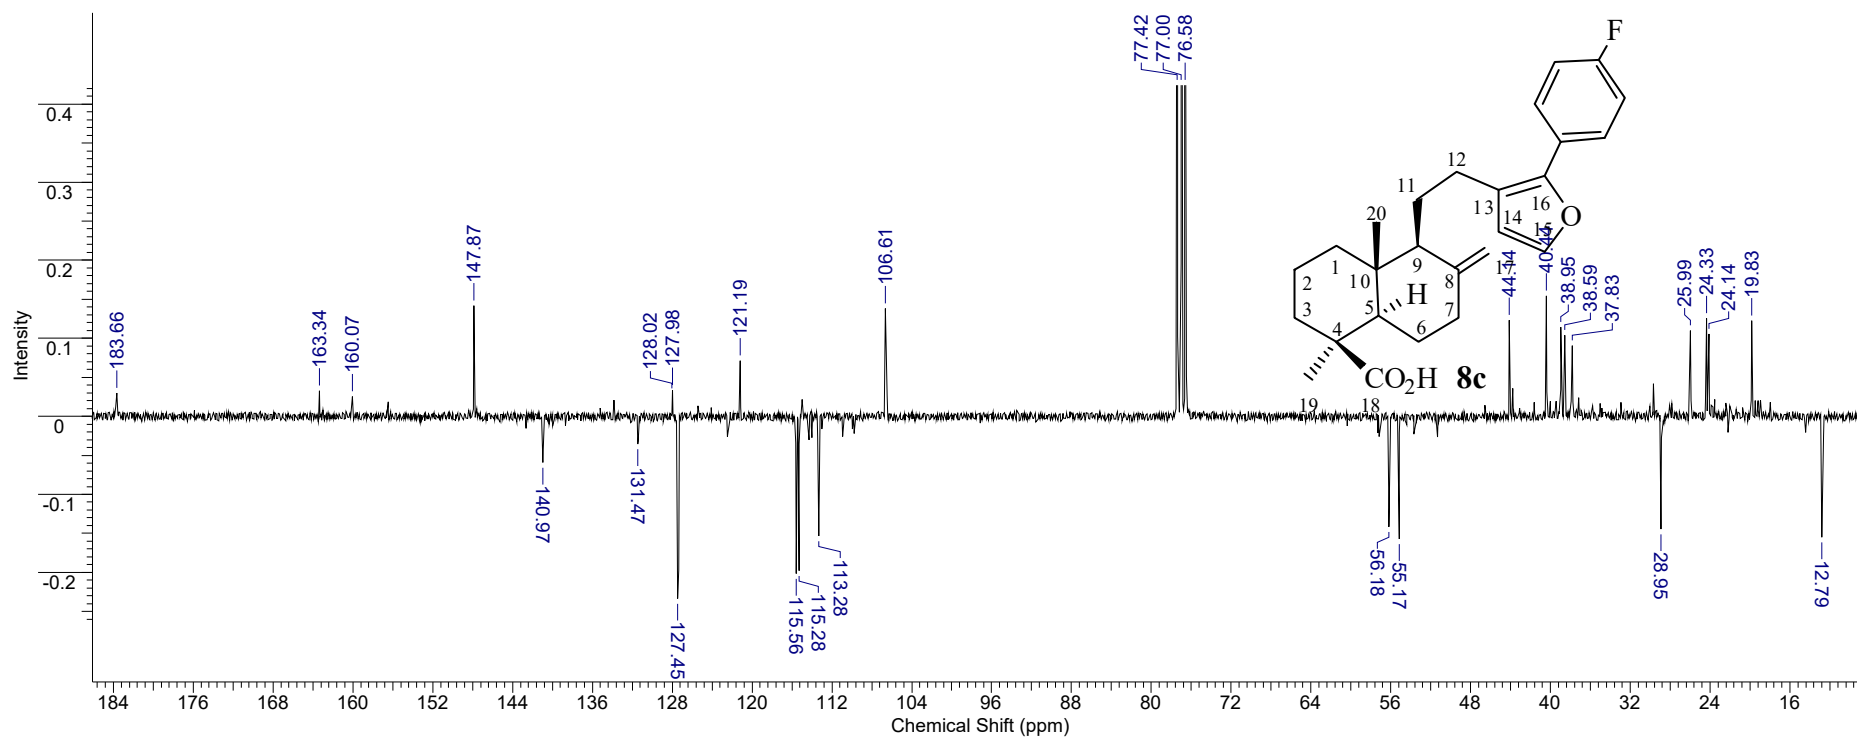

***(3bS,5aR,6S,9aR,9bR)*-3b-(4-methoxybenzyl)-6,9a-dimethyl-3b,4,5,5a,6,7,8,9,9a,9b,10,11-dodecahydrophenanthro[1,2-b]furan-6-carboxylic acid**  
**(7d)** ( $^1\text{H}$  NMR, 400 MHz,  $\text{CDCl}_3$ )

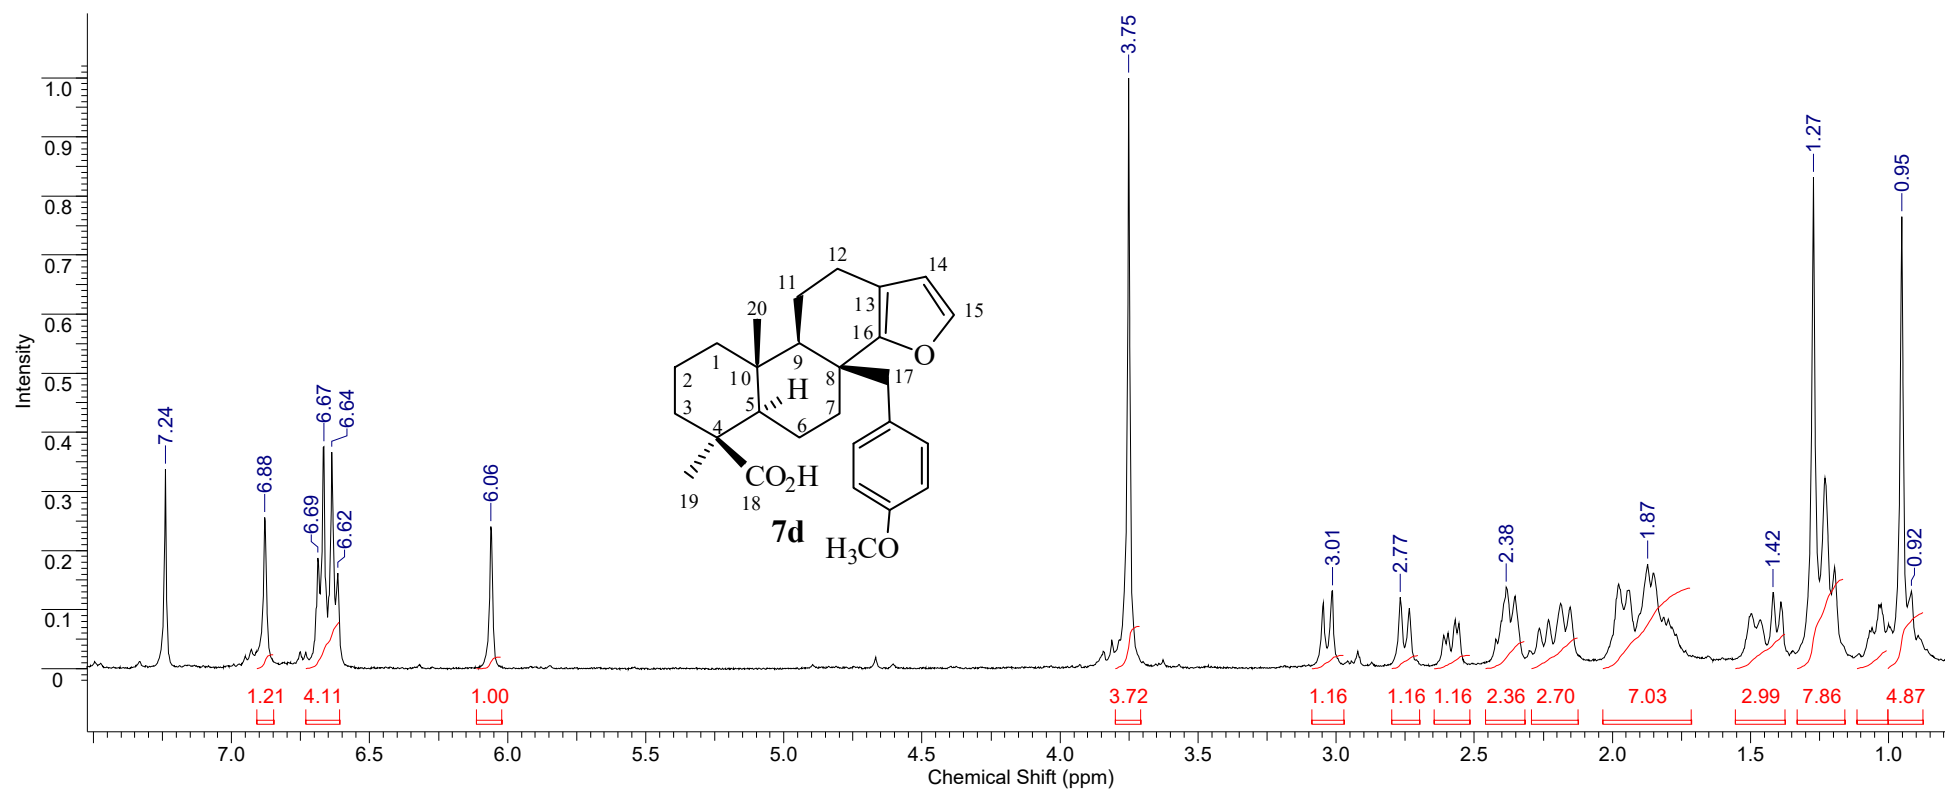

**(3*bS*,5*aR*,6*S*,9*aR*,9*bR*)-3*b*-(4-methoxybenzyl)-6,9*a*-dimethyl-3*b*,4,5,5*a*,6,7,8,9,9*a*,9*b*,10,11-dodecahydrophenanthro[1,2-*b*]furan-6-carboxylic acid**  
**(7d)** ( $^{13}\text{C}$  NMR, 75 MHz,  $\text{CDCl}_3$ )

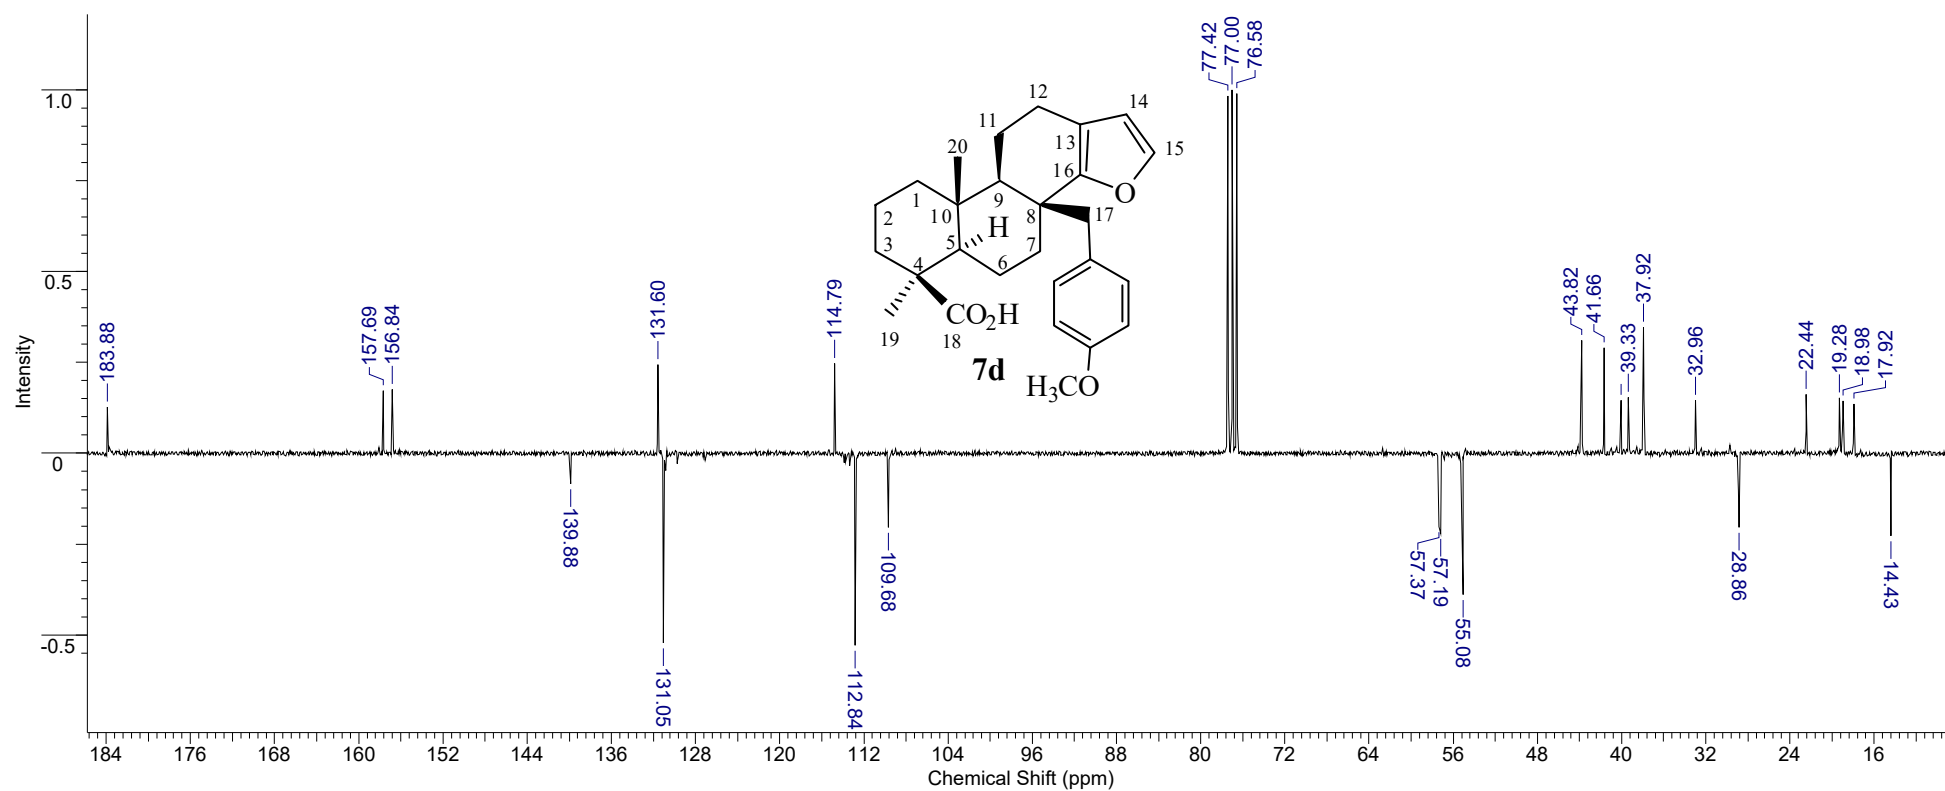

**(1*S*,4*aR*,5*S*,8*aR*)-5-(2-(2-(4-methoxyphenyl)furan-3-yl)ethyl)-1,4*a*-dimethyl-6-methylenedecahydronaphthalene-1-carboxylic acid (**8d**)**

(<sup>1</sup>H NMR, 400 MHz, CDCl<sub>3</sub>)

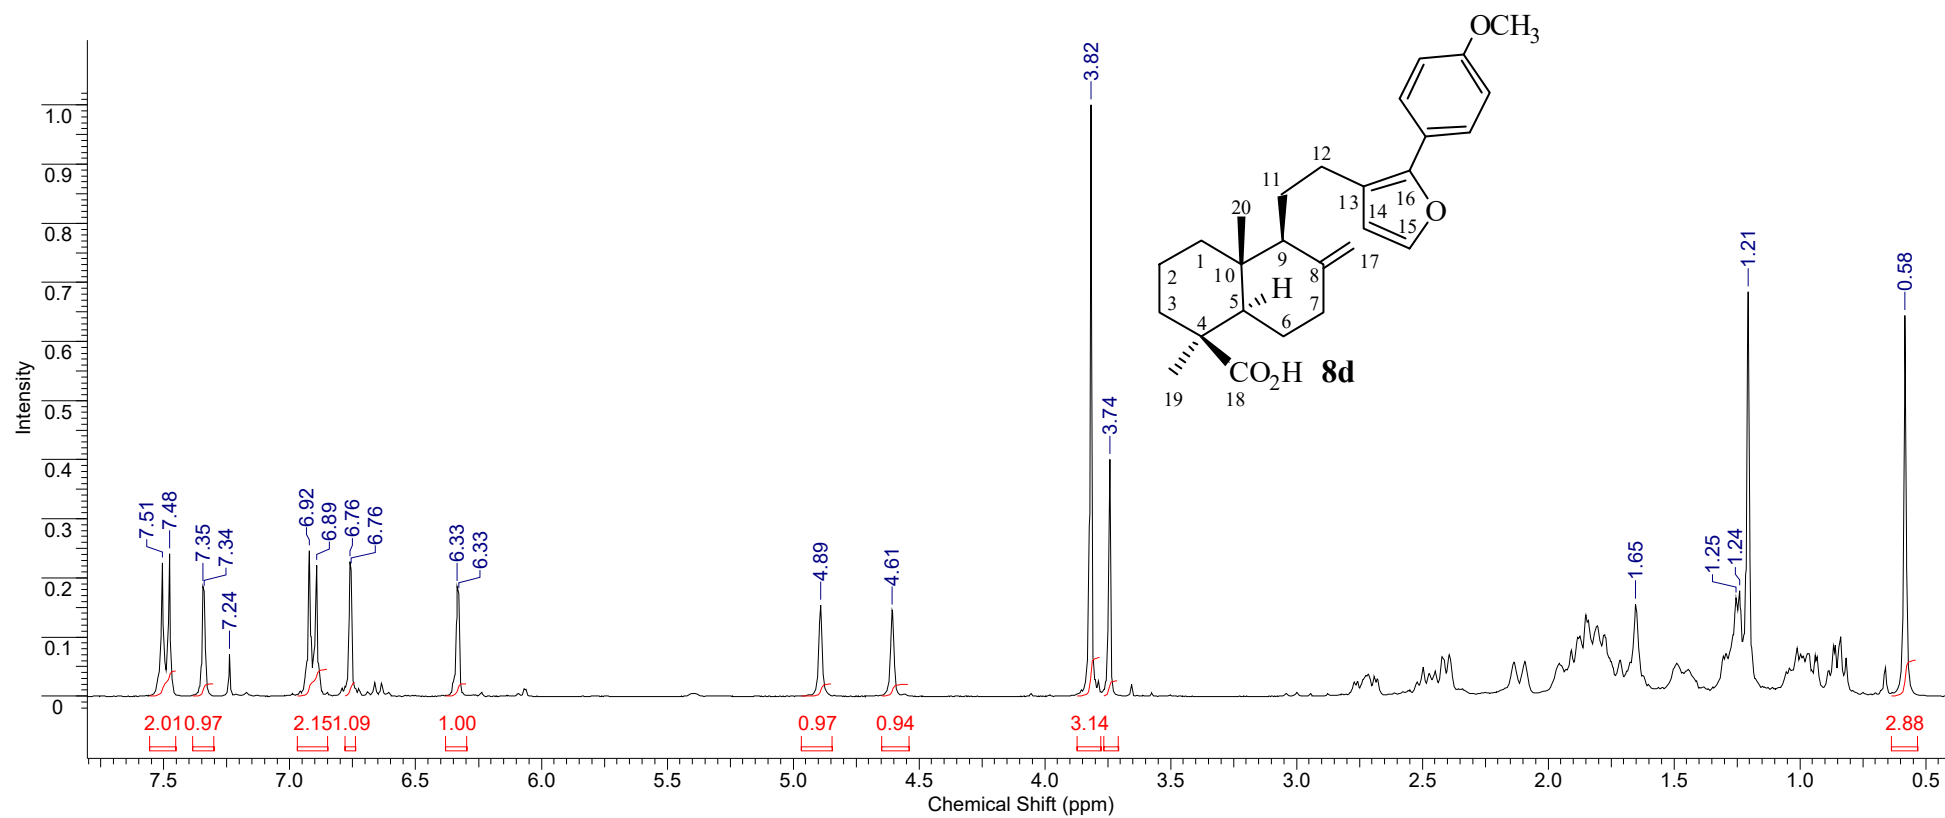



***(1S,4aR,5S,8aR)-5-(2-(2-(4-methoxyphenyl)furan-3-yl)ethyl)-1,4a-dimethyl-6-methylenedecahydronaphthalene-1-carboxylic acid (8d)***

(<sup>13</sup>C NMR, 75 MHz, CDCl<sub>3</sub>)

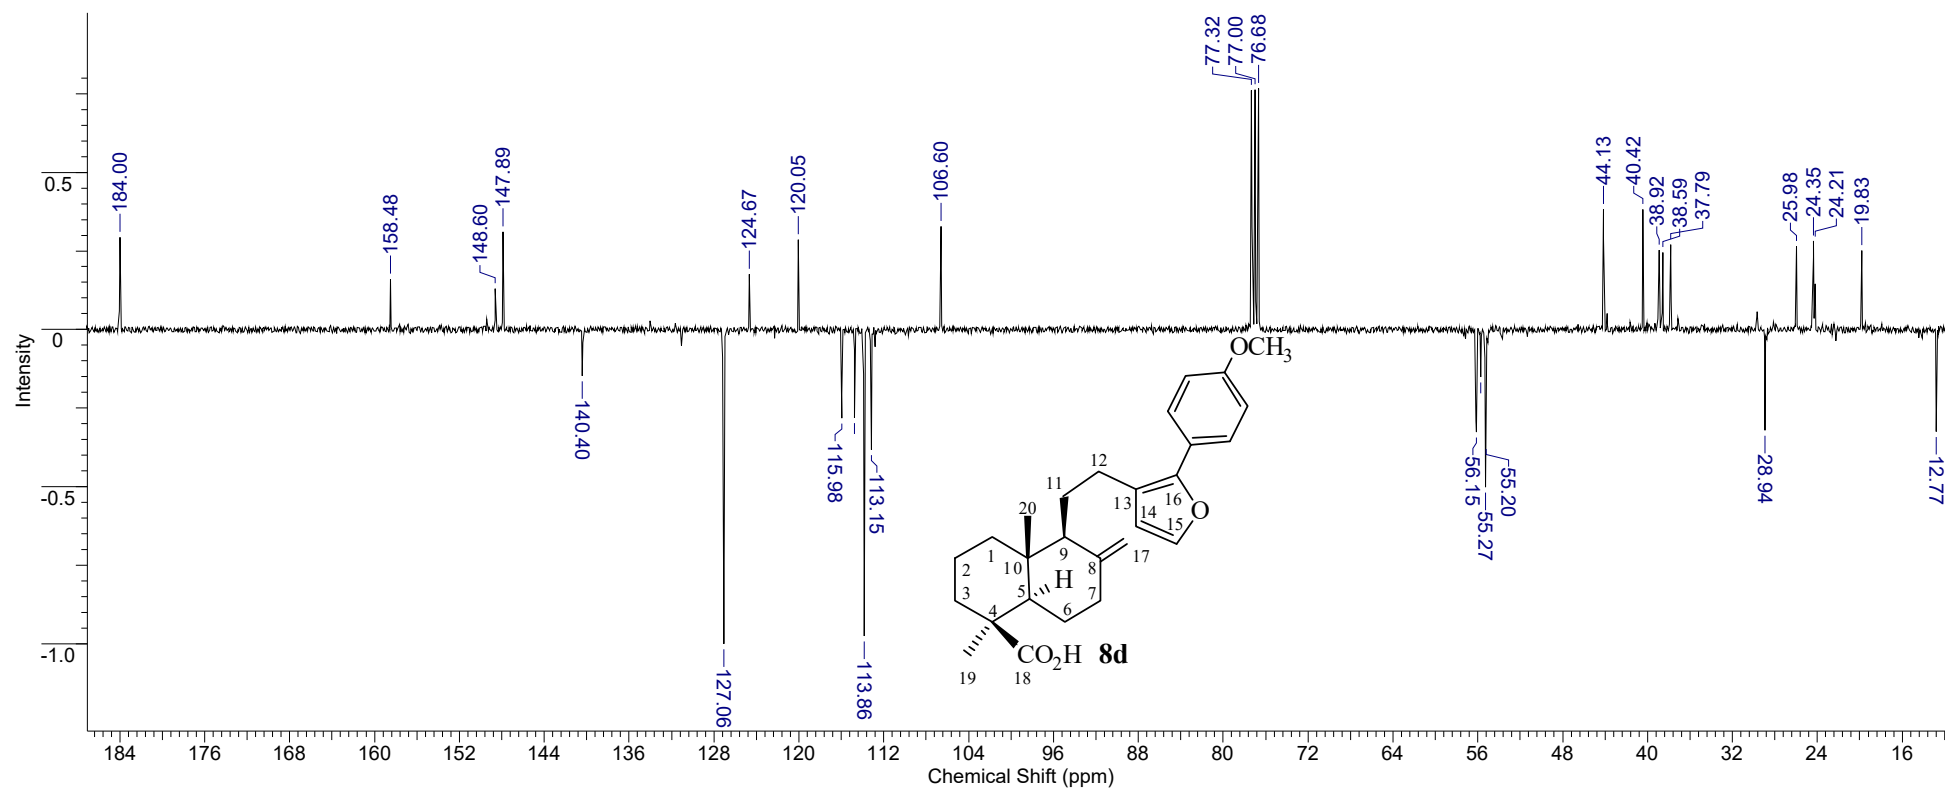

**(5aR,6S,9aR,9bR)-6,9a-dimethyl-3b-(2-methylbenzyl)-3b,4,5,5a,6,7,8,9,9a,9b,10,11-dodecahydrophenanthro[1,2-b]furan-6-carboxylic acid (7i)**

(<sup>1</sup>H NMR, 400 MHz, CDCl<sub>3</sub>)

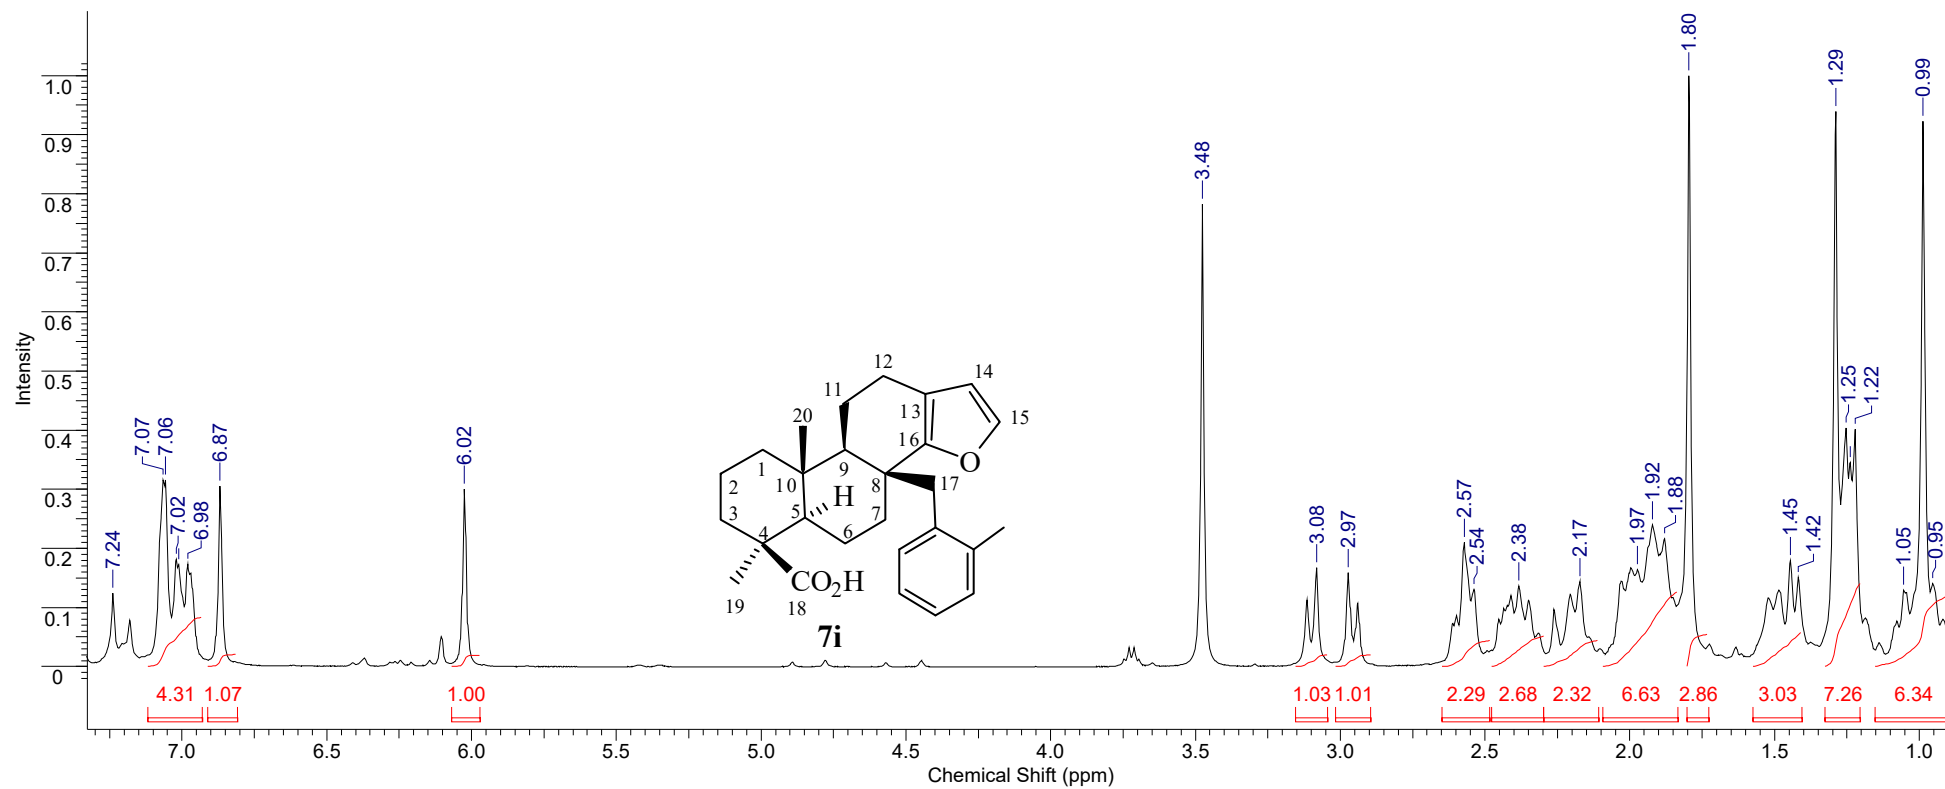

***(5aR,6S,9aR,9bR)-6,9a-dimethyl-3b-(2-methylbenzyl)-3b,4,5,5a,6,7,8,9,9a,9b,10,11-dodecahydrophenanthro[1,2-b]furan-6-carboxylic acid (7i)***

(<sup>13</sup>C NMR, 126 MHz, CDCl<sub>3</sub>)

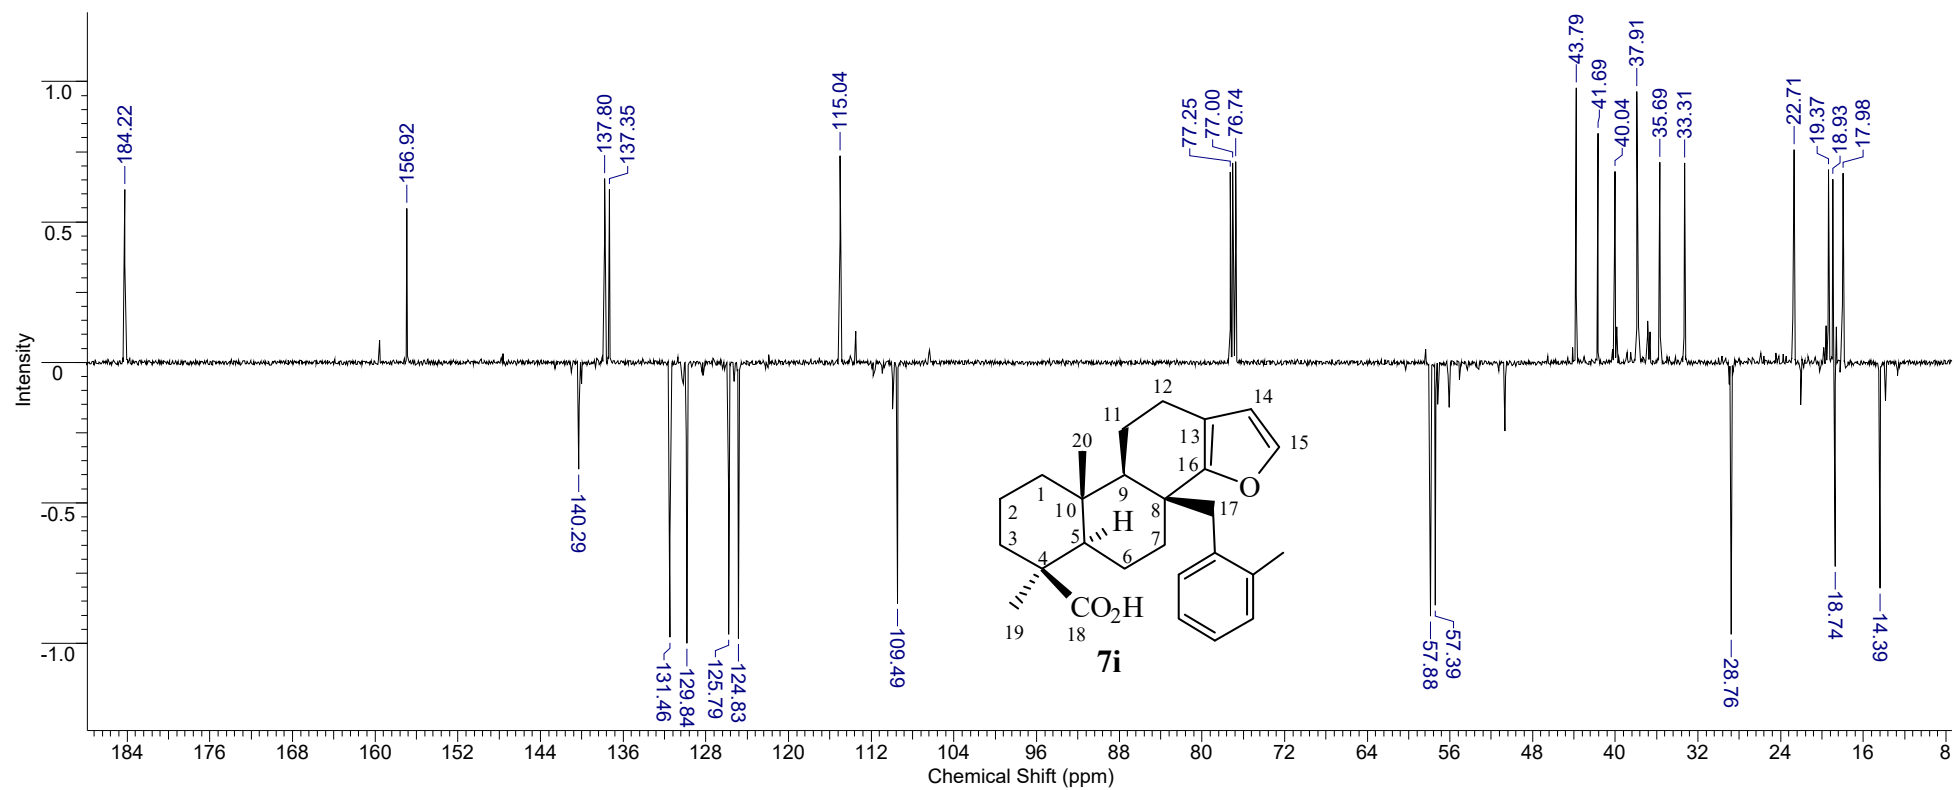

**(5aR,6S,9aR,9bR)-6,9a-dimethyl-3b-(3,4,5-trimethoxybenzyl)-3b,4,5,5a,6,7,8,9,9a,9b,10,11-dodecahydrophenanthro[1,2-b]furan-6-carboxylic acid**

**(7j)** ( $^1\text{H}$  NMR, 300 MHz,  $\text{CDCl}_3$ )

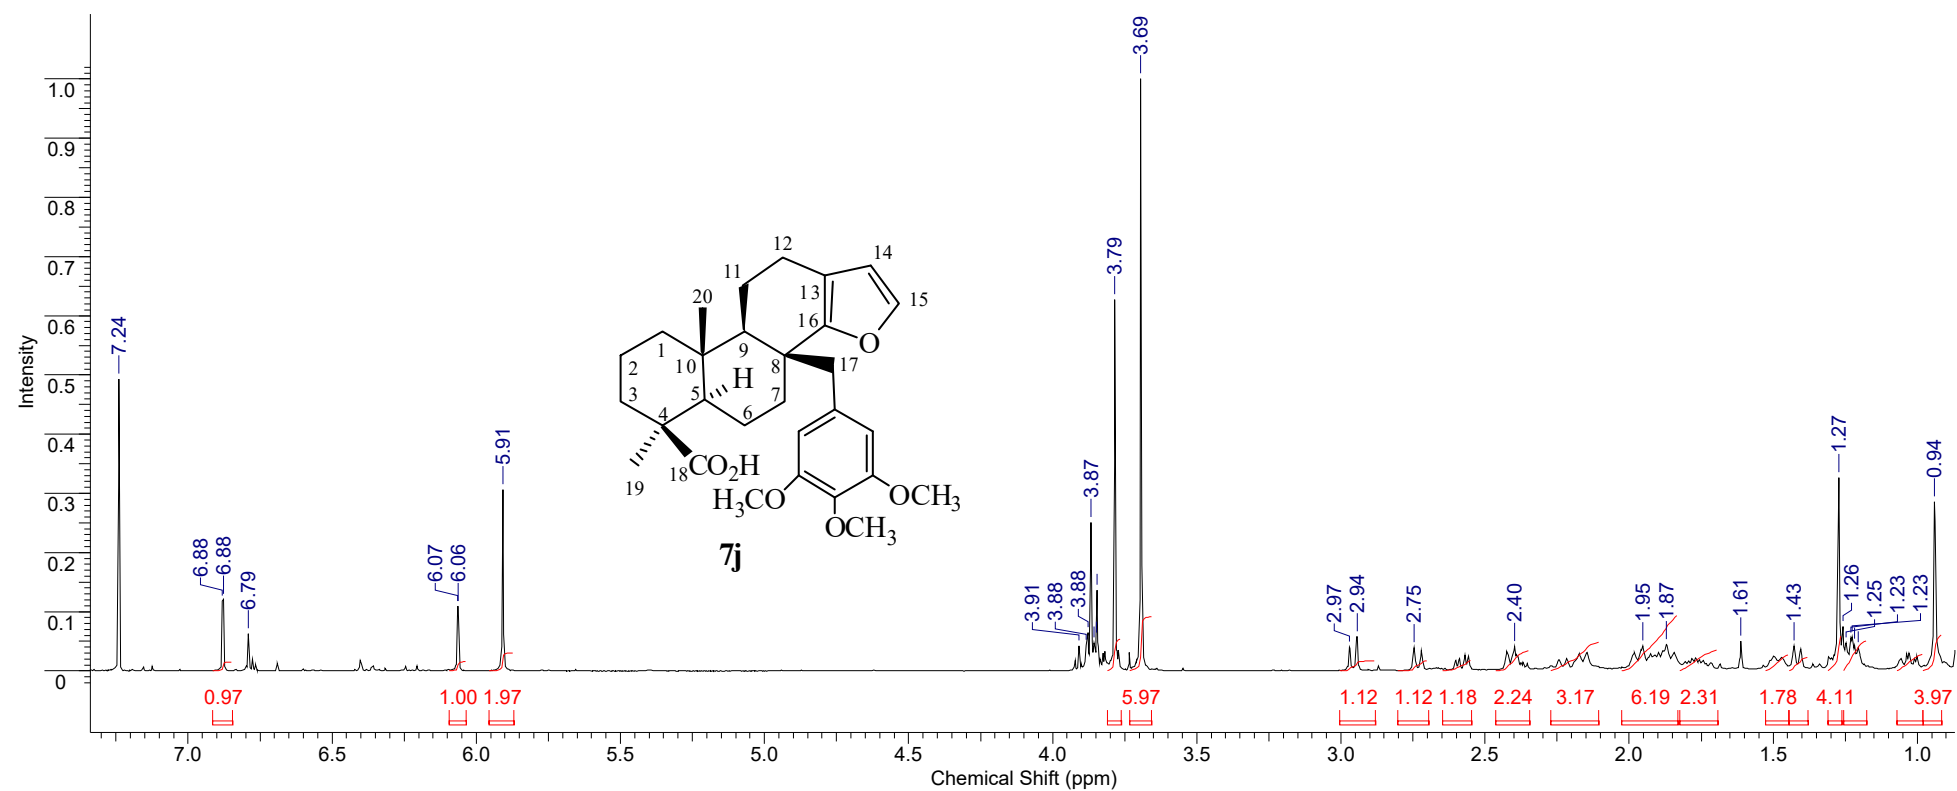

**(5aR,6S,9aR,9bR)-6,9a-dimethyl-3b-(3,4,5-trimethoxybenzyl)-3b,4,5,5a,6,7,8,9,9a,9b,10,11-dodecahydrophenanthro[1,2-b]furan-6-carboxylic acid**  
**(7j)** ( $^{13}\text{C}$  NMR, 126 MHz,  $\text{CDCl}_3$ )

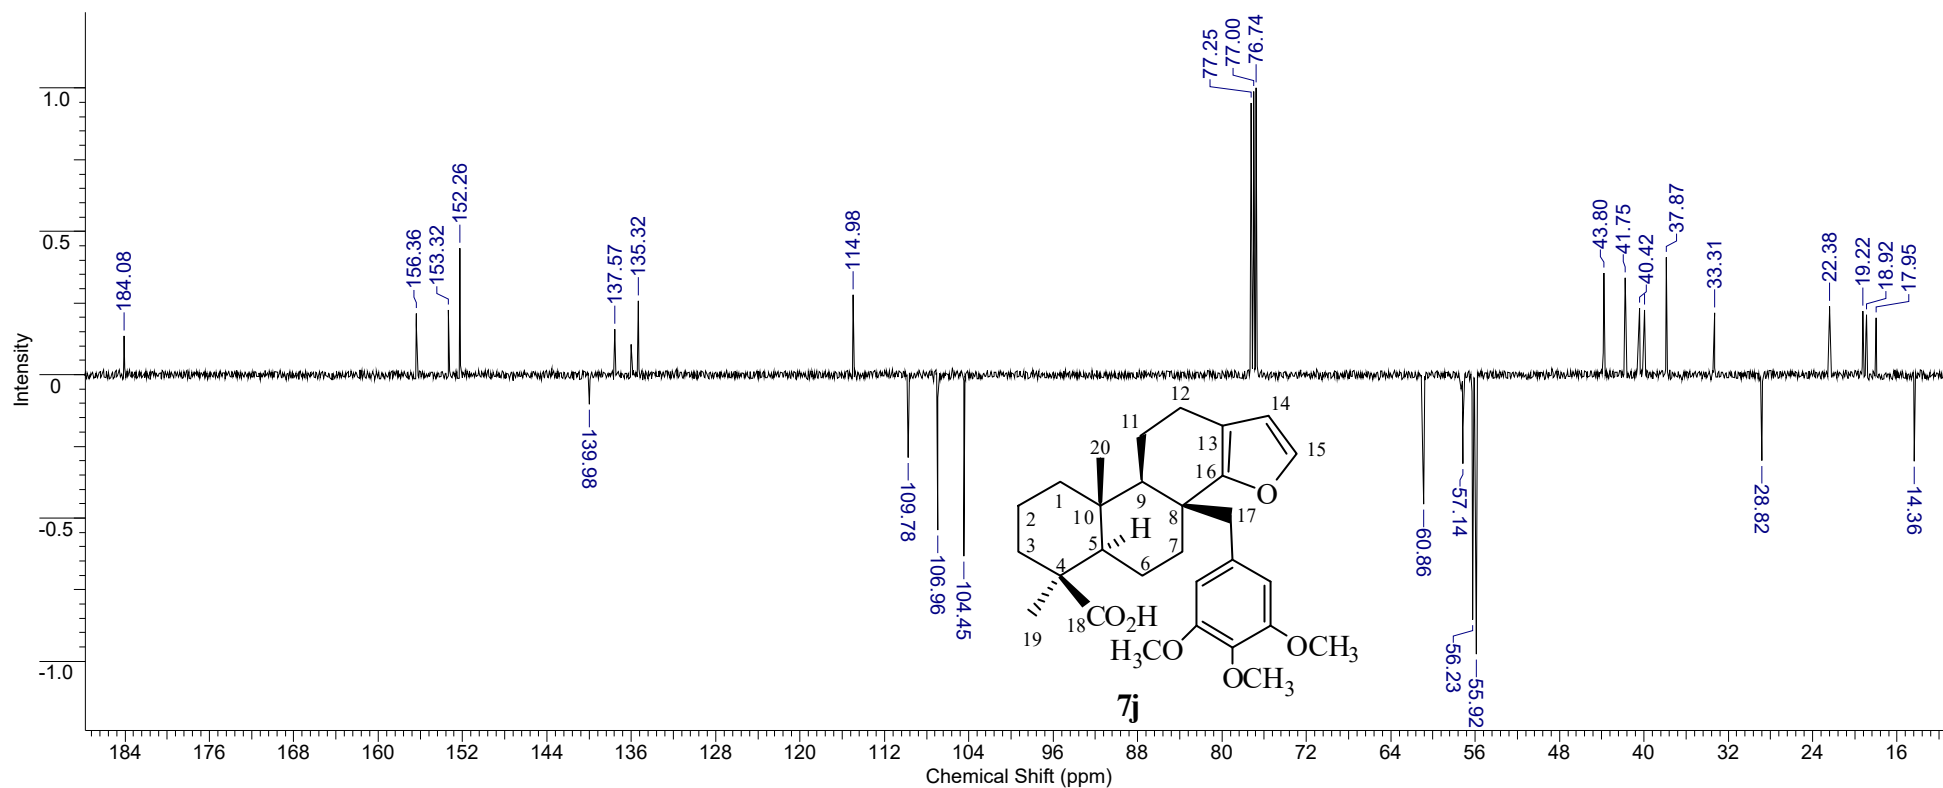

***(1S,4aR,5S,8aR)*-1,4a-dimethyl-6-methylene-5-(2-(2-(3,4,5-trimethoxyphenyl)furan-3-yl)ethyl)decahydronaphthalene-1-carboxylic acid (**8j**)**

(<sup>1</sup>H NMR, 300 MHz, CDCl<sub>3</sub>)

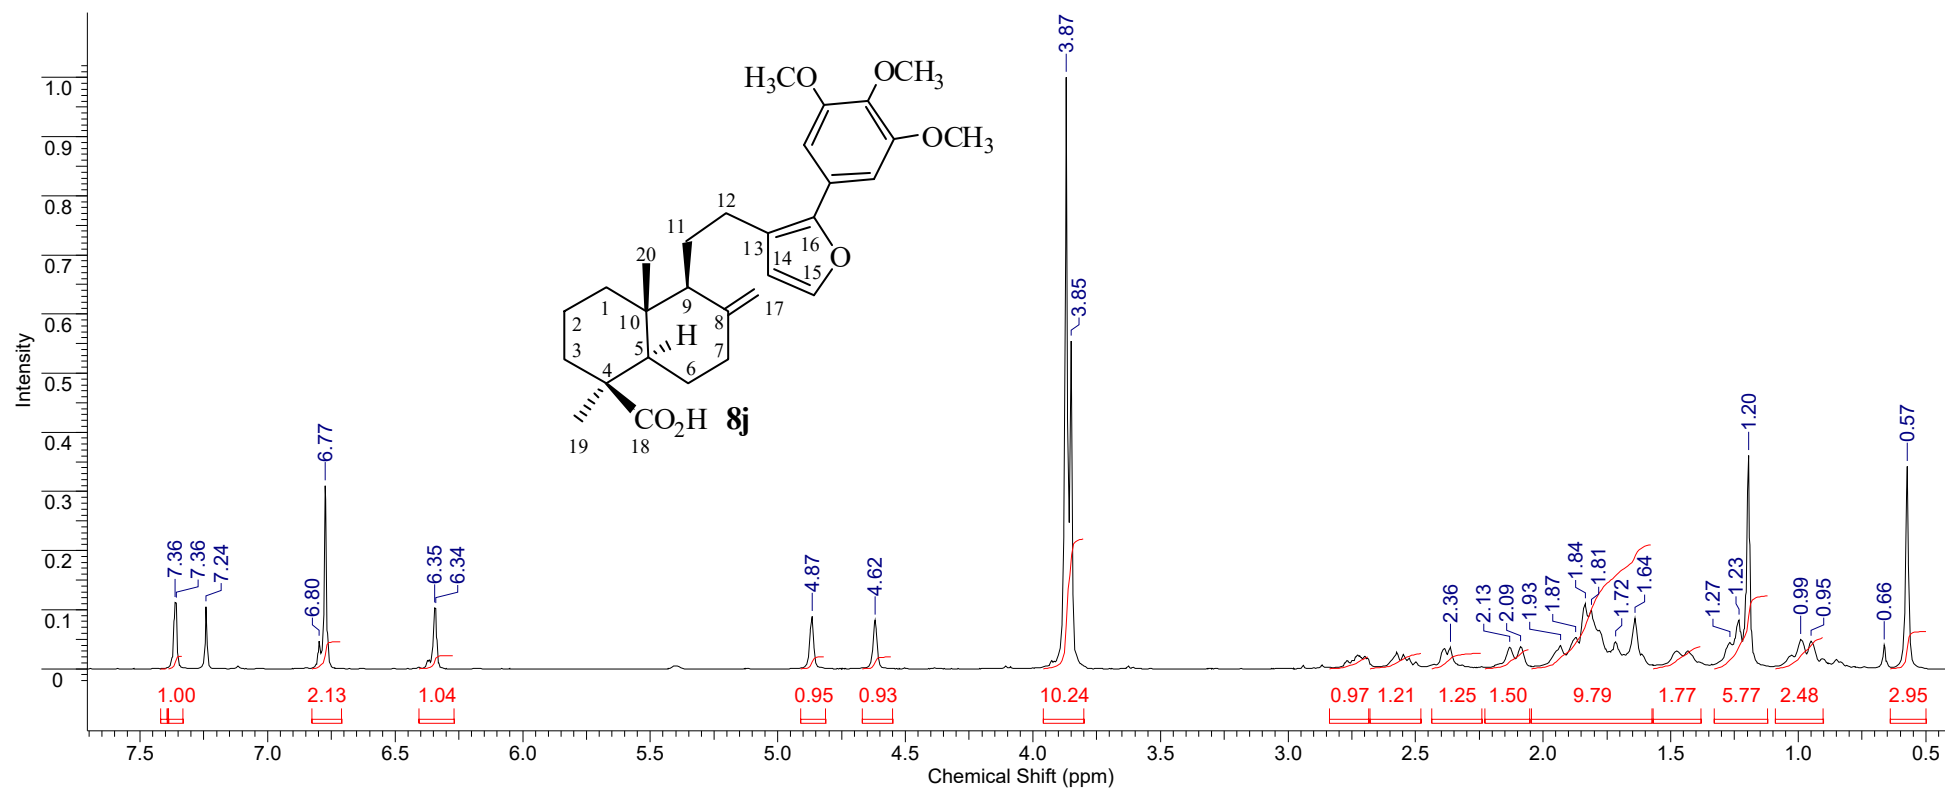

***(1S,4aR,5S,8aR)-1,4a-dimethyl-6-methylene-5-(2-(2-(3,4,5-trimethoxyphenyl)furan-3-yl)ethyl)decahydronaphthalene-1-carboxylic acid (8j)***

(<sup>13</sup>C NMR, 151 MHz, CDCl<sub>3</sub>)

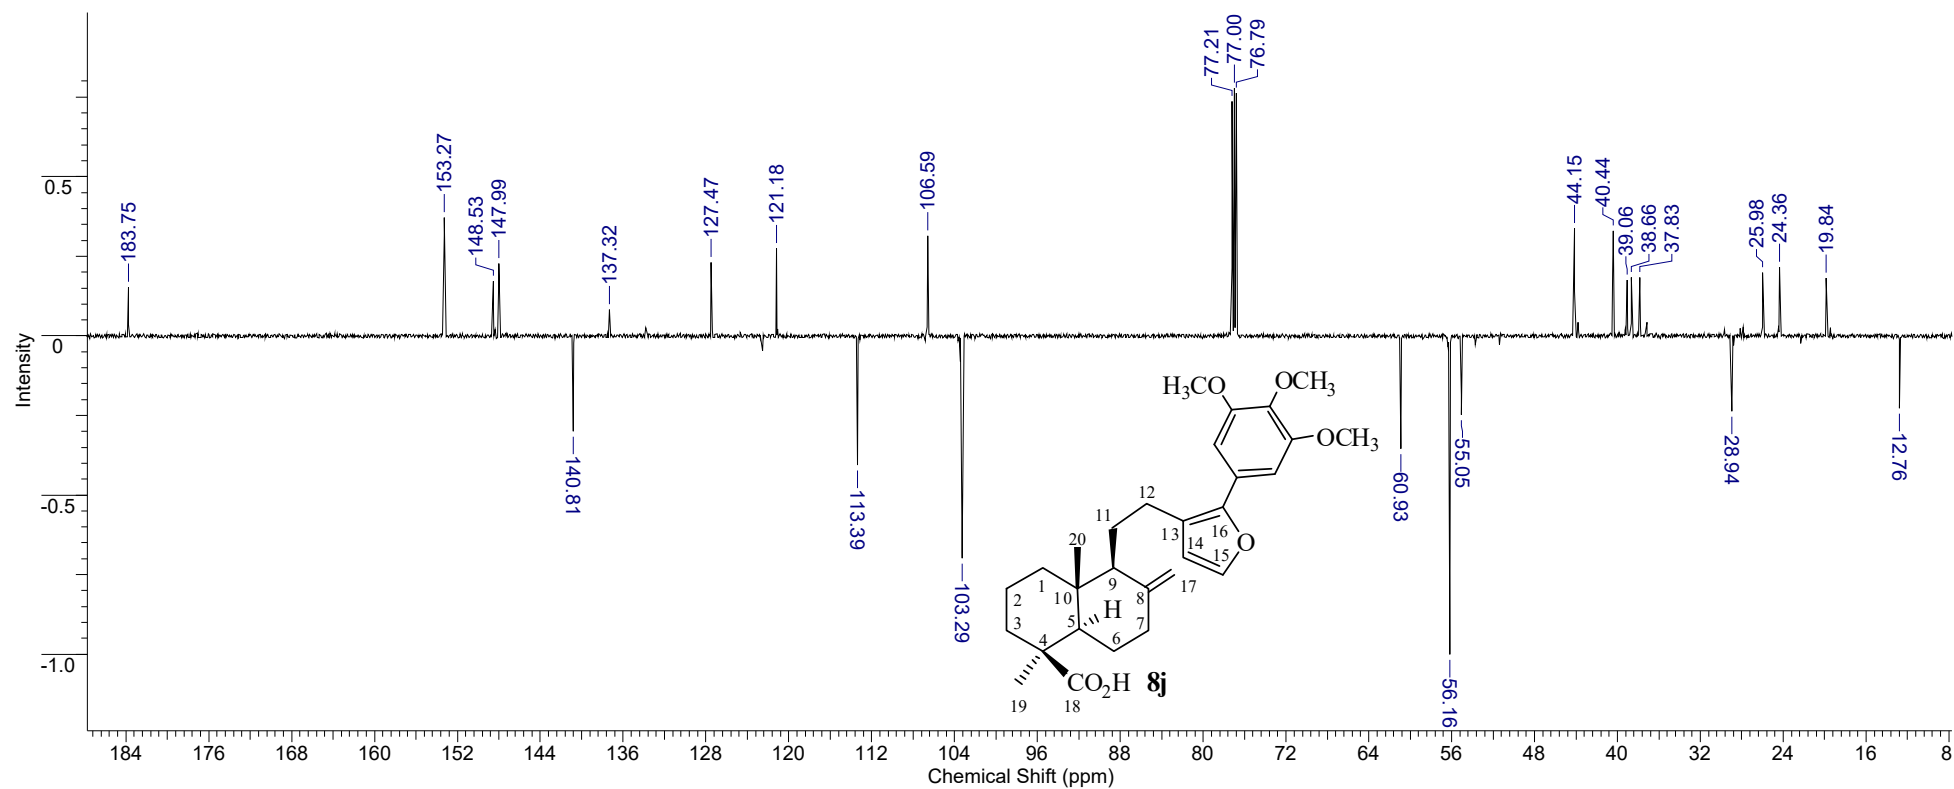

***(5aR,6S,9aR,9bR)*-6,9a-dimethyl-3b-(4-(trifluoromethyl)benzyl)-3b,4,5,5a,6,7,8,9,9a,9b,10,11-dodecahydrophenanthro[1,2-b]furan-6-carboxylic acid (**7e**)** (<sup>1</sup>H NMR, 400 MHz, CDCl<sub>3</sub>)

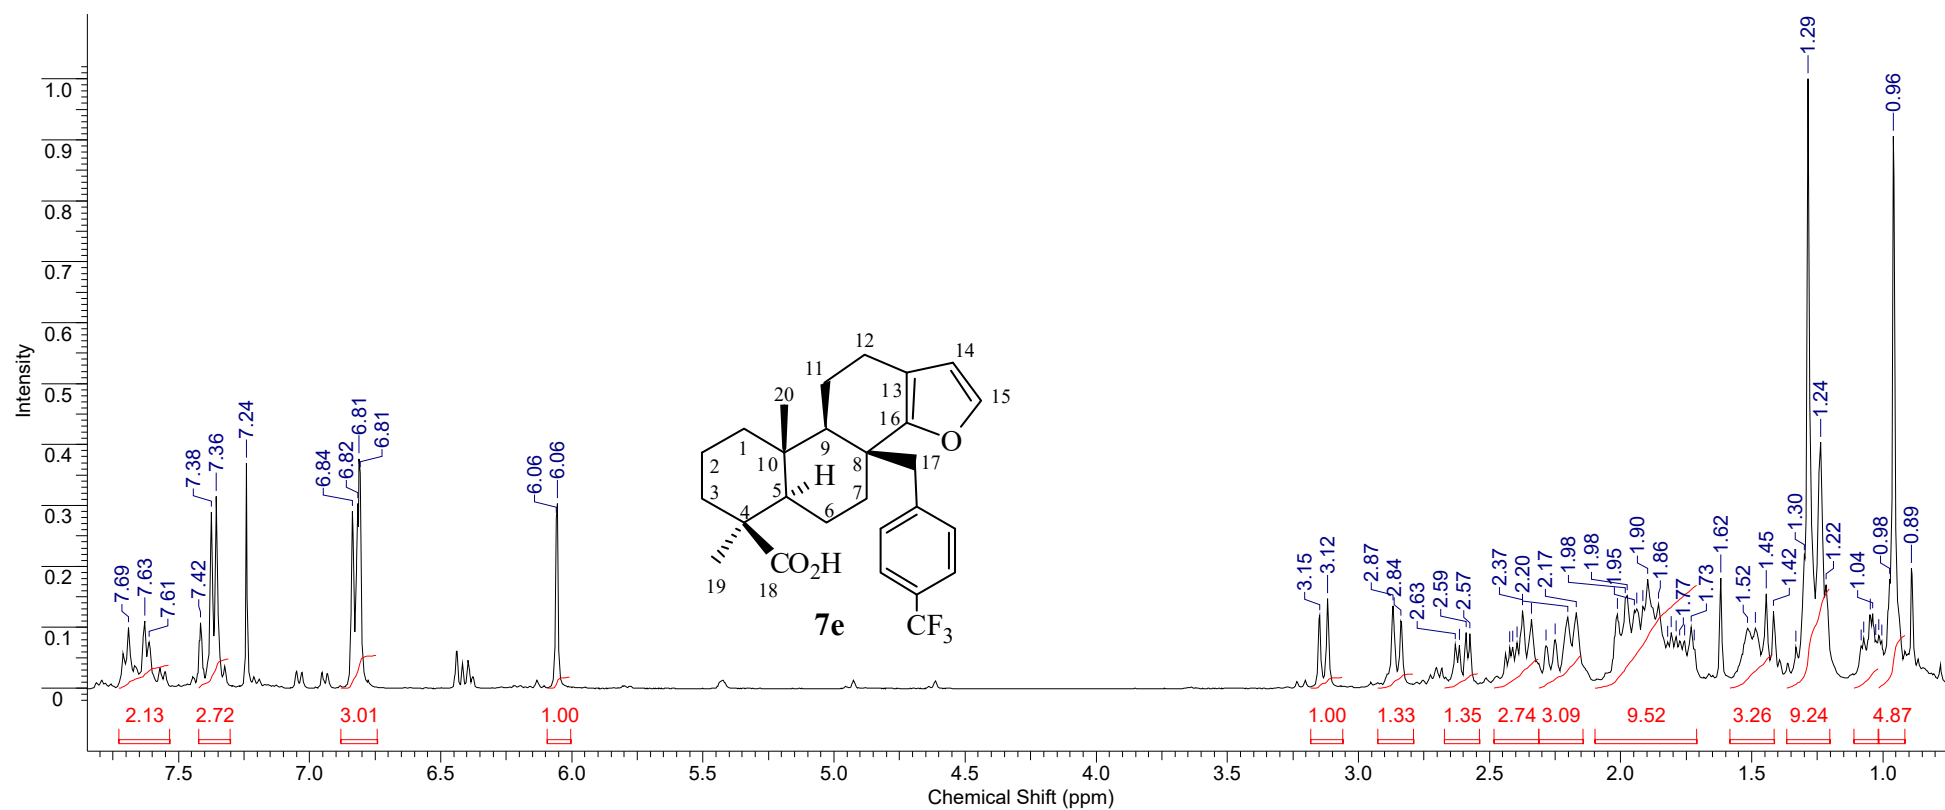



***(5aR,6S,9aR,9bR)*-6,9a-dimethyl-3b-(4-(trifluoromethyl)benzyl)-3b,4,5,5a,6,7,8,9,9a,9b,10,11-dodecahydrophenanthro[1,2-b]furan-6-carboxylic acid (7e)** ( $^{13}\text{C}$  NMR, 126 MHz,  $\text{CDCl}_3$ )

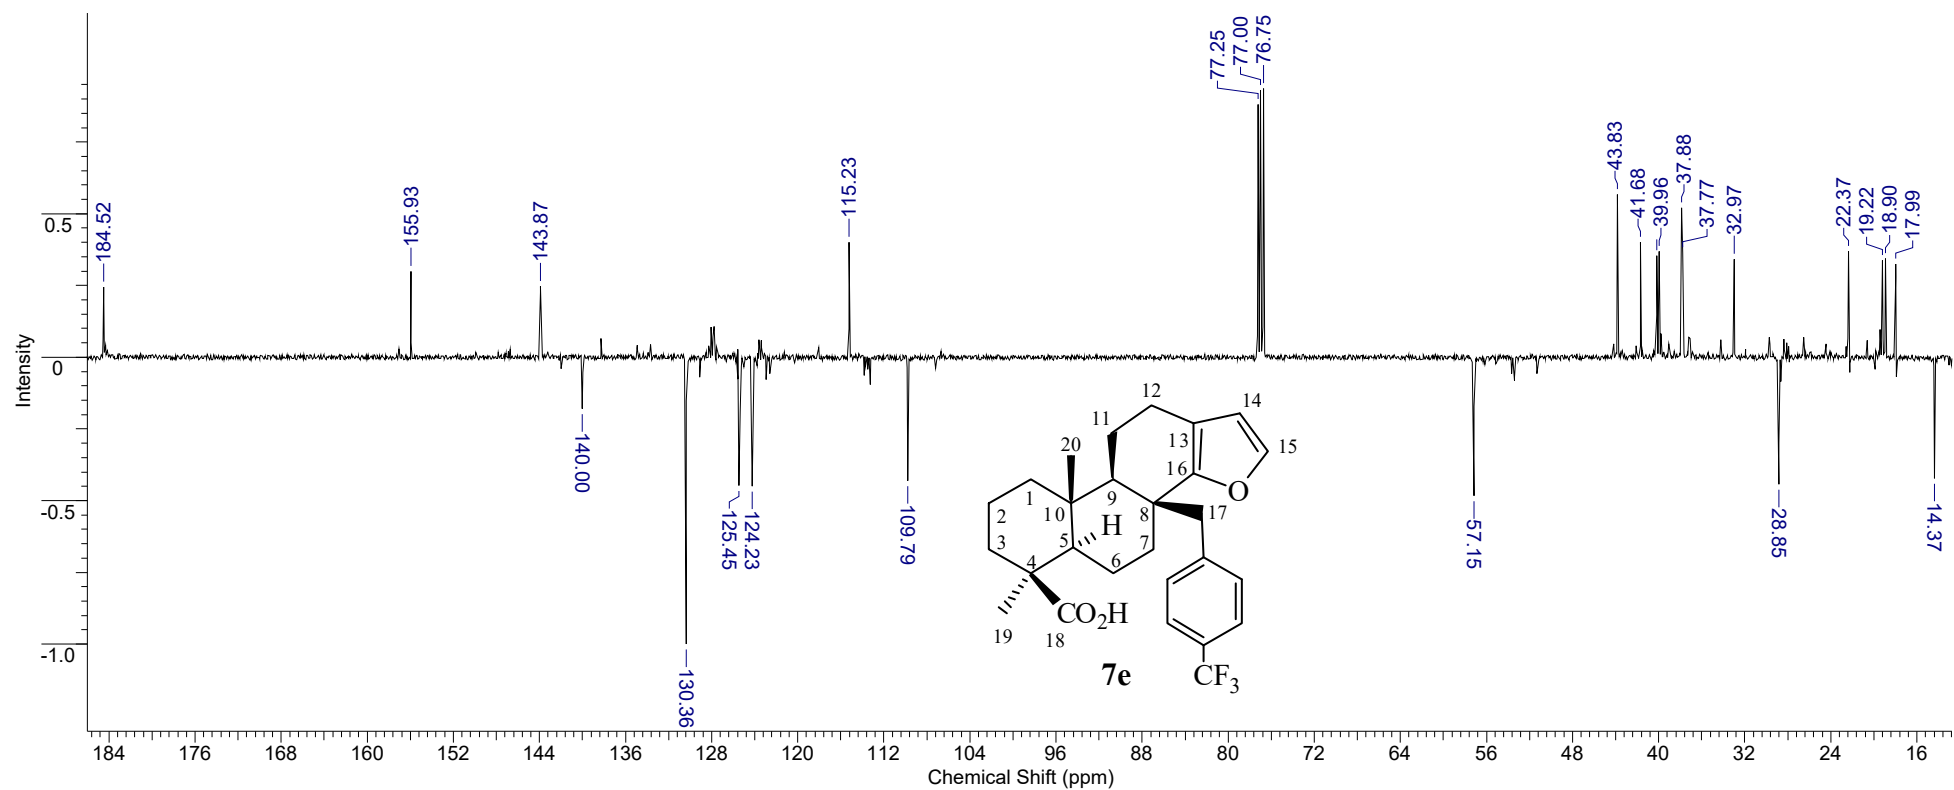

***(3bS,5aR,6S,9aR,9bR)-3b-(4-cyanobenzyl)-6,9a-dimethyl-3b,4,5,5a,6,7,8,9,9a,9b,10,11-dodecahydrophenanthro[1,2-b]furan-6-carboxylic acid (7f)***

(<sup>1</sup>H NMR, 600 MHz, CDCl<sub>3</sub>)

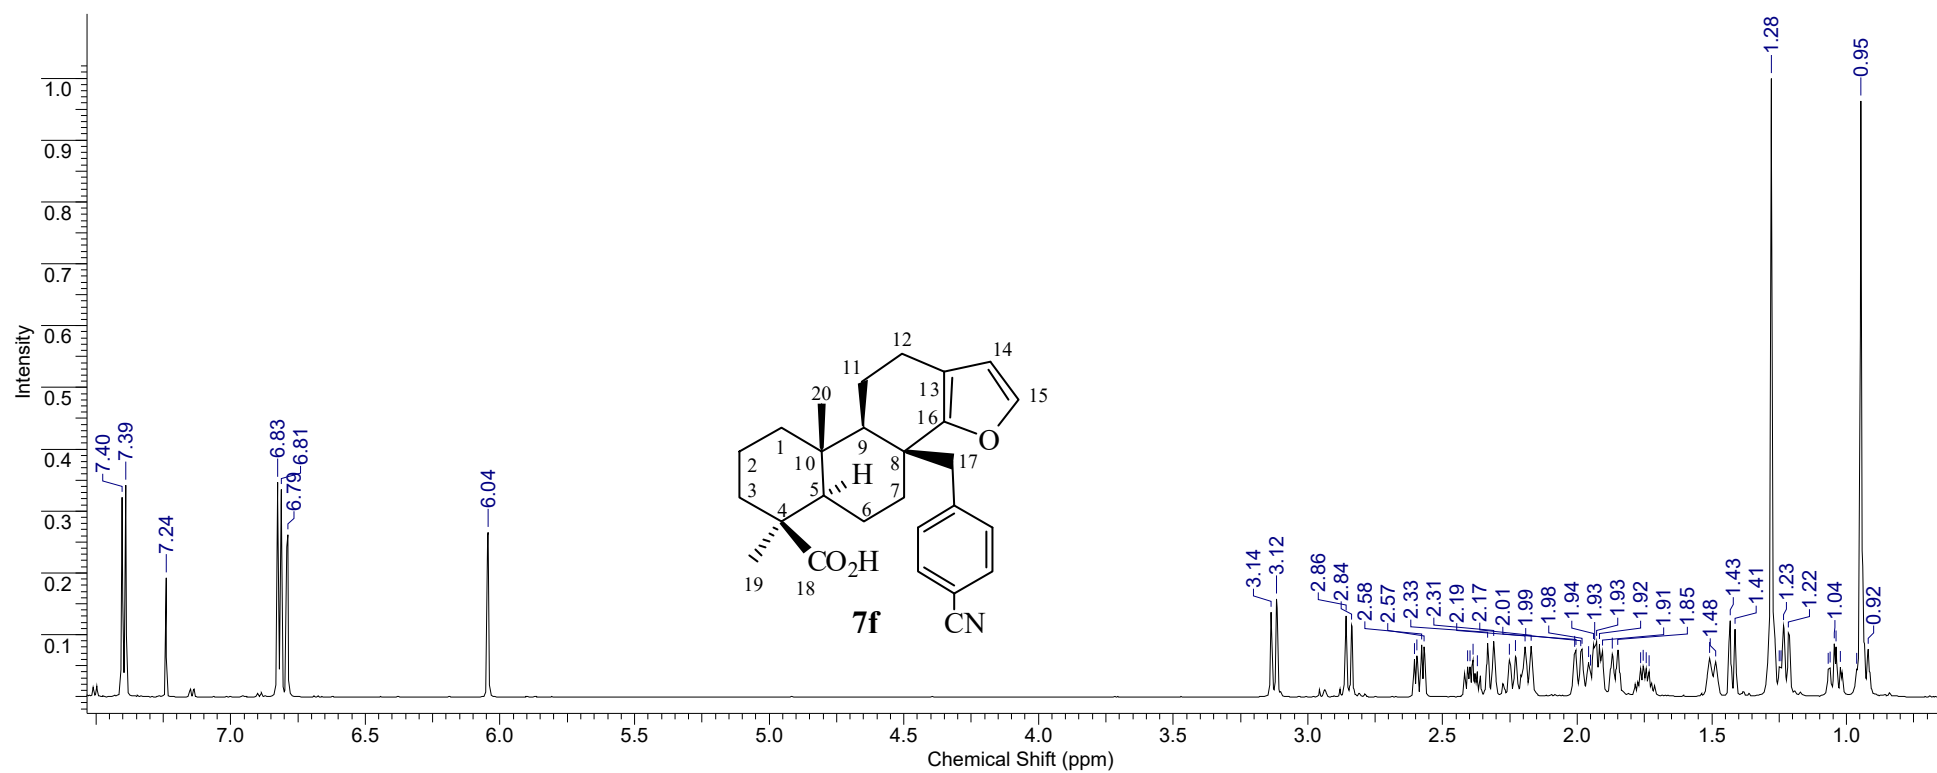

**(3*bS*,5*aR*,6*S*,9*aR*,9*bR*)-3*b*-(4-cyanobenzyl)-6,9*a*-dimethyl-3*b*,4,5,5*a*,6,7,8,9,9*a*,9*b*,10,11-dodecahydrophenanthro[1,2-*b*]furan-6-carboxylic acid (7*f*)**

(<sup>13</sup>C NMR, 151 MHz, CDCl<sub>3</sub>)

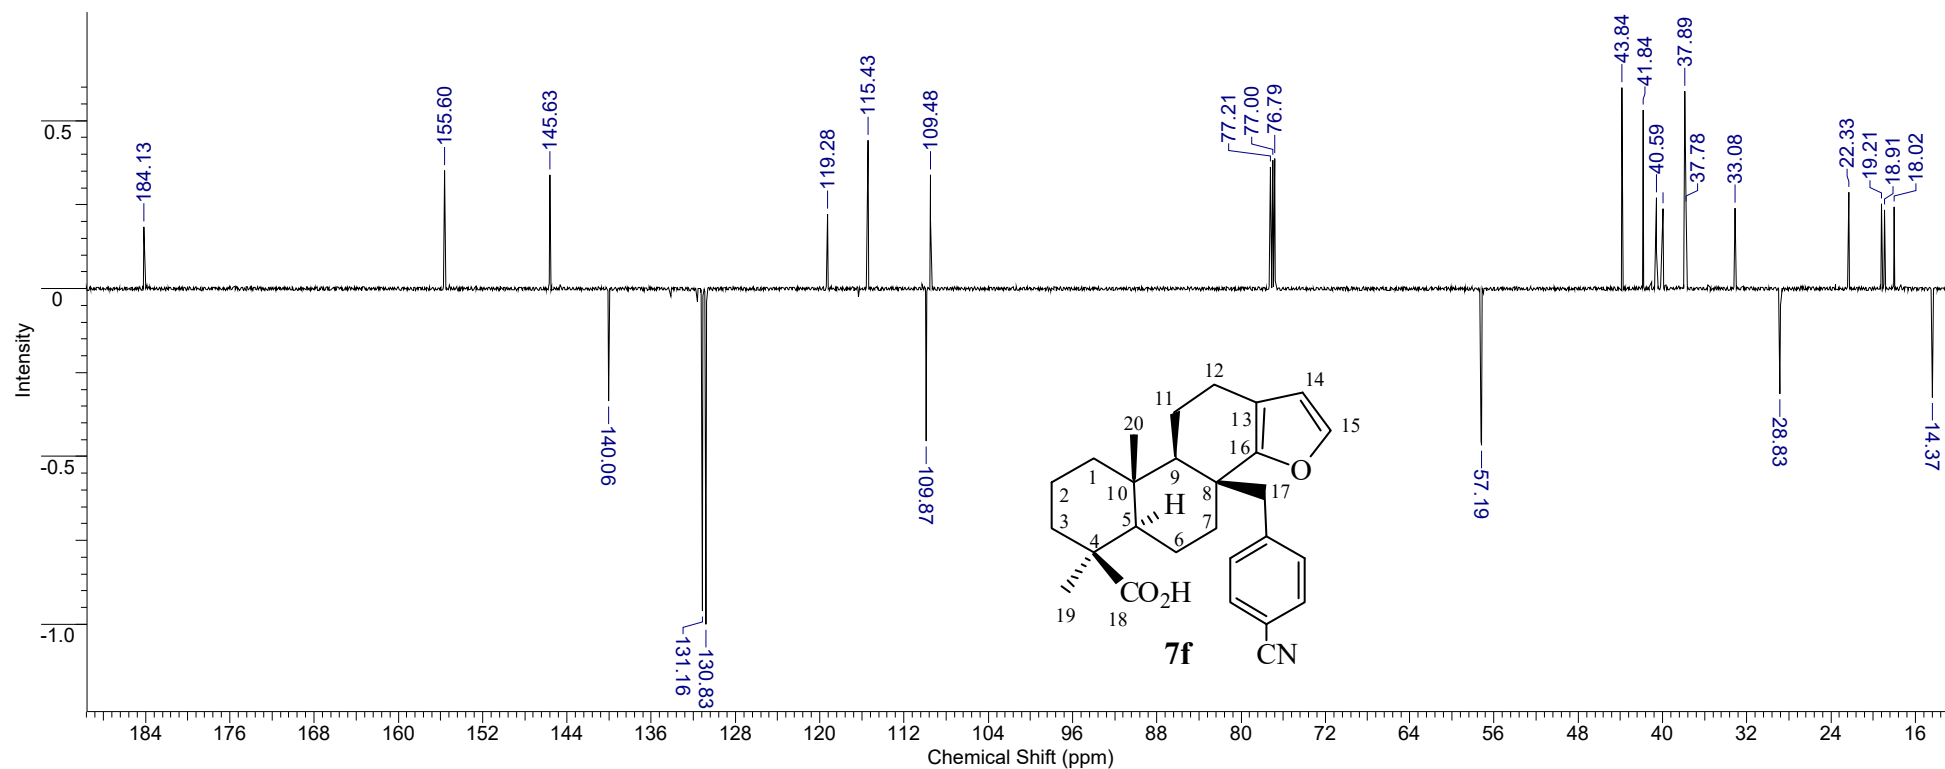

**(3*bS*,5*aR*,6*S*,9*aR*,9*bR*)-3*b*-(3-fluorobenzyl)-6,9*a*-dimethyl-3*b*,4,5,5*a*,6,7,8,9,9*a*,9*b*,10,11-dodecahydrophenanthro[1,2-*b*]furan-6-carboxylic acid (7g)**

(<sup>1</sup>H NMR, 300 MHz, CDCl<sub>3</sub>)

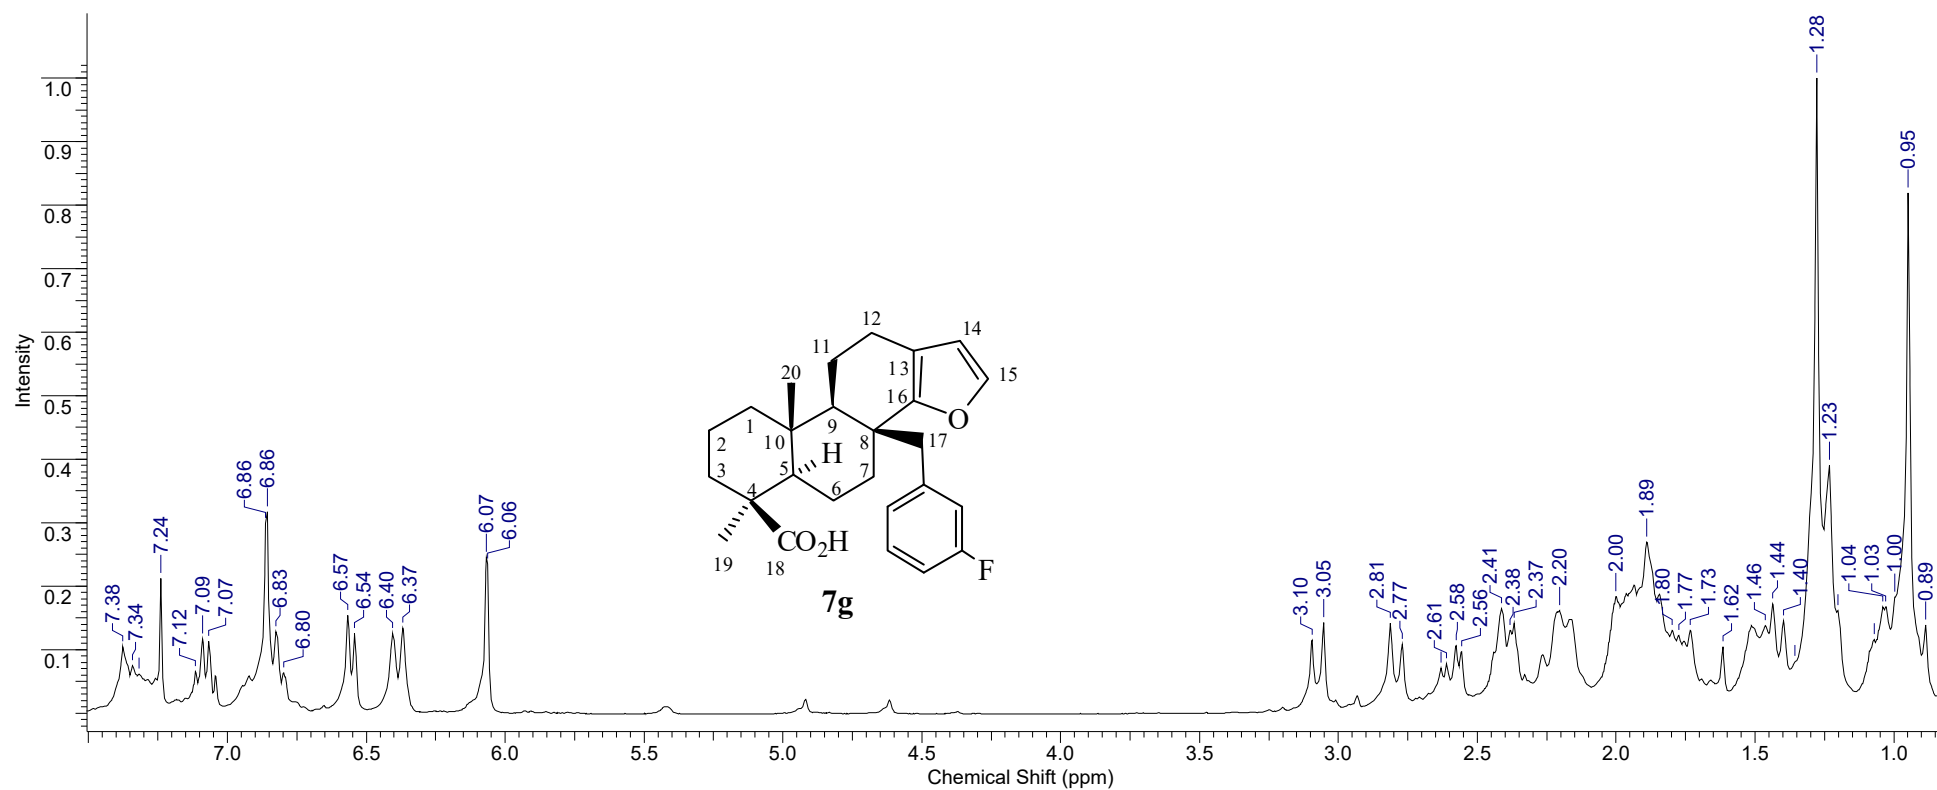

*(3bS,5aR,6S,9aR,9bR)-3b-(3-fluorobenzyl)-6,9a-dimethyl-3b,4,5,5a,6,7,8,9,9a,9b,10,11-dodecahydrophenanthro[1,2-b]furan-6-carboxylic acid (7g)*

( $^{13}\text{C}$  NMR, 126 MHz,  $\text{CDCl}_3$ )

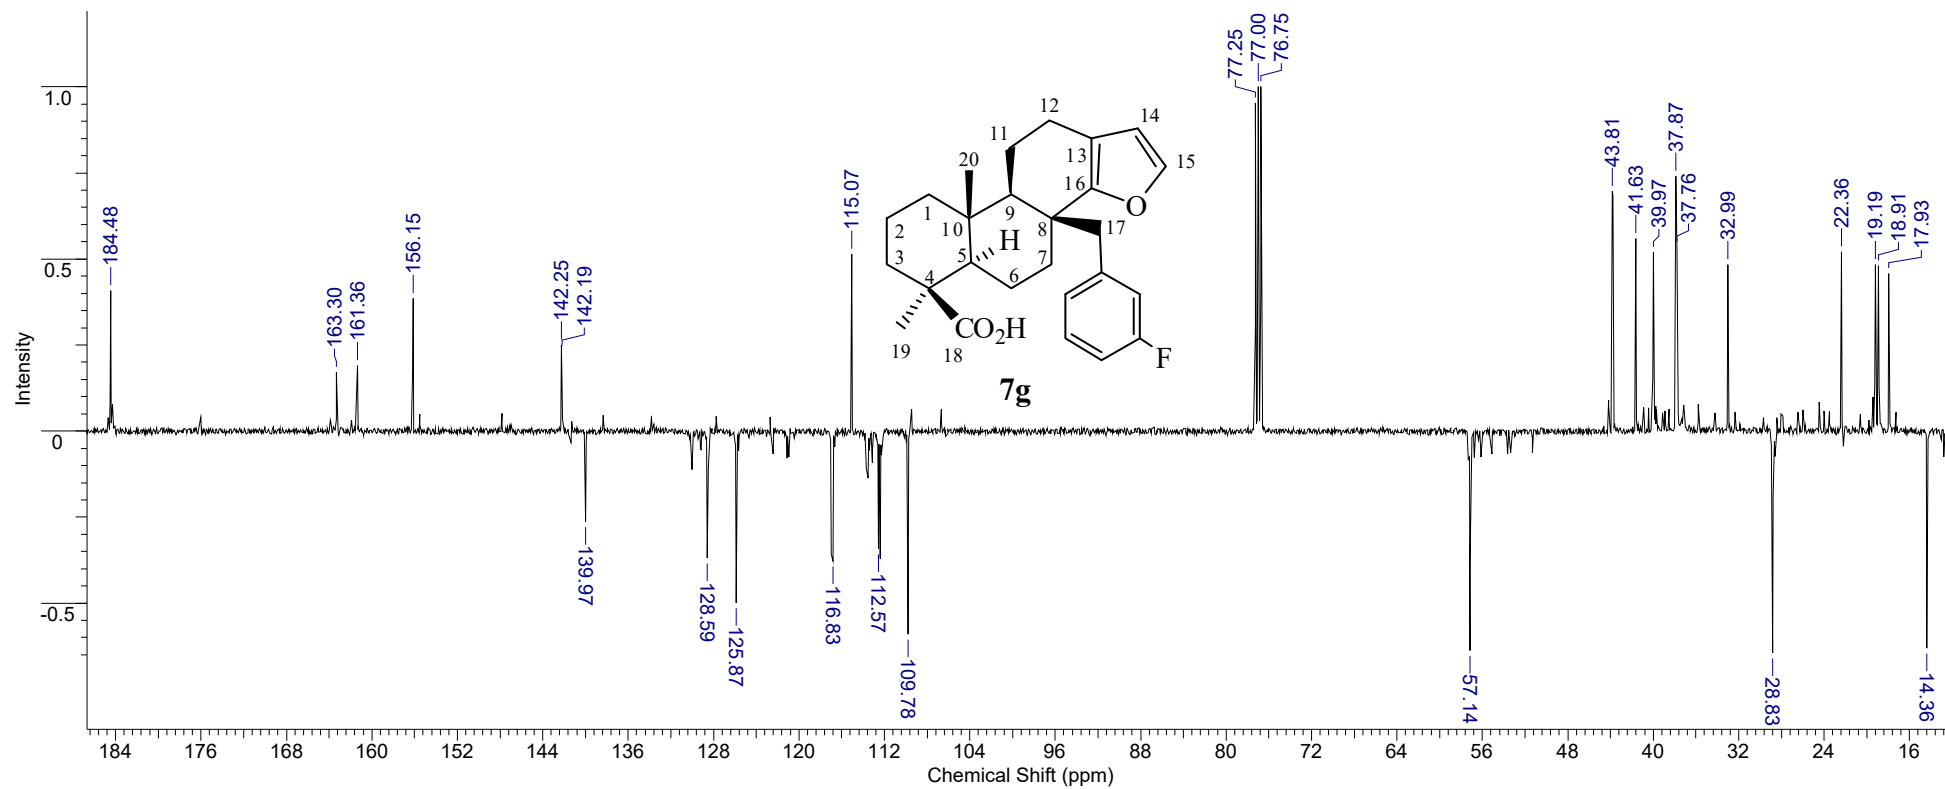

**(3*bS*,5*aR*,6*S*,9*aR*,9*bR*)-3*b*-(3-methoxybenzyl)-6,9*a*-dimethyl-3*b*,4,5,5*a*,6,7,8,9,9*a*,9*b*,10,11-dodecahydrophenanthro[1,2-*b*]furan-6-carboxylic acid**  
**(7h)** (<sup>1</sup>H NMR, 500 MHz, CDCl<sub>3</sub>)

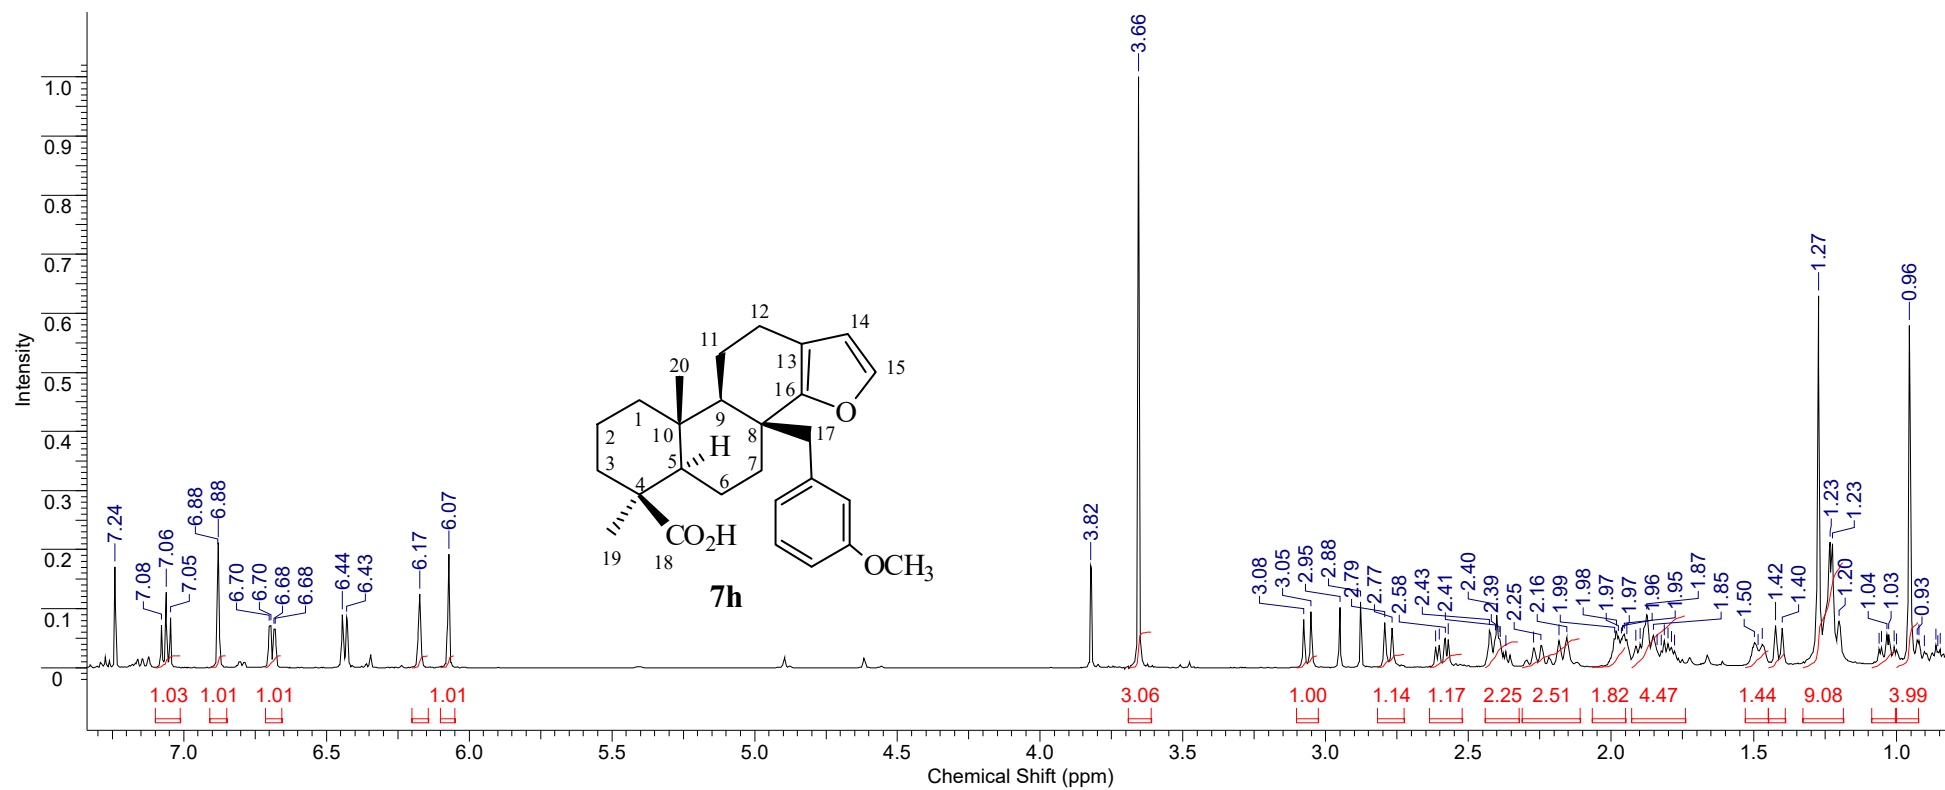

**(3*bS*,5*aR*,6*S*,9*aR*,9*bR*)-3*b*-(3-methoxybenzyl)-6,9*a*-dimethyl-3*b*,4,5,5*a*,6,7,8,9,9*a*,9*b*,10,11-dodecahydrophenanthro[1,2-*b*]furan-6-carboxylic acid**  
**(7h)** ( $^{13}\text{C}$  NMR, 126 MHz,  $\text{CDCl}_3$ )

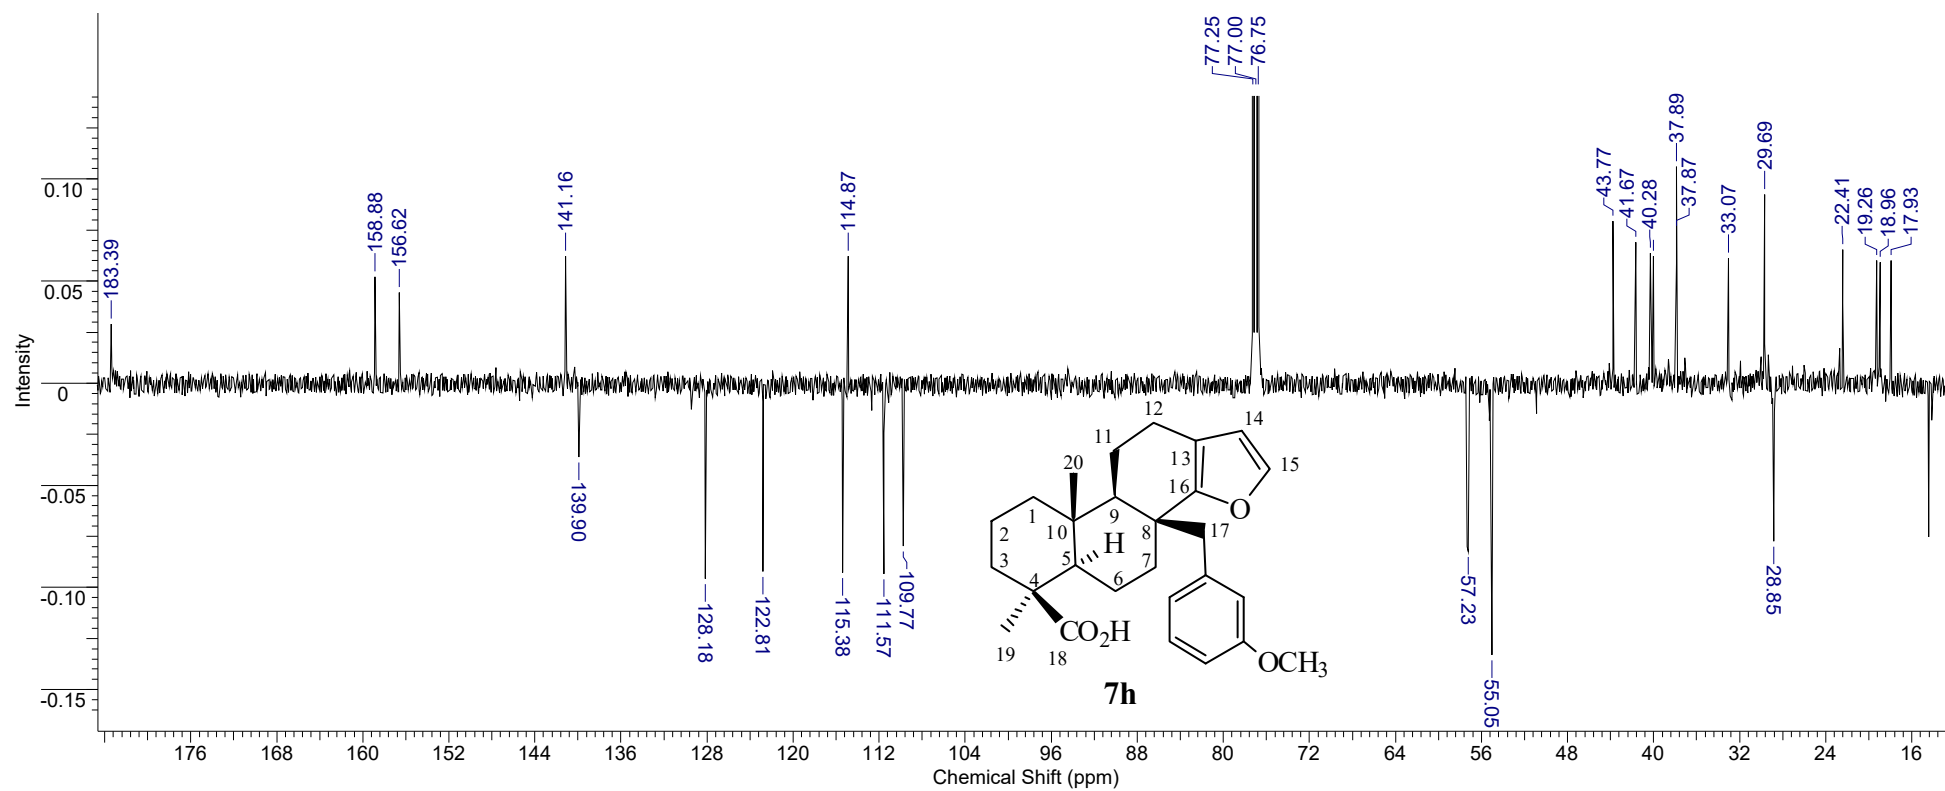

***(1S,4aR,5S,8aR)*-5-(2-(2-bromo-5-formylfuran-3-yl)ethyl)-1,4a-dimethyl-6-methylenedecahydronaphthalene-1-carboxylic acid (**9**)**

(<sup>1</sup>H NMR, 300 MHz, CDCl<sub>3</sub>)

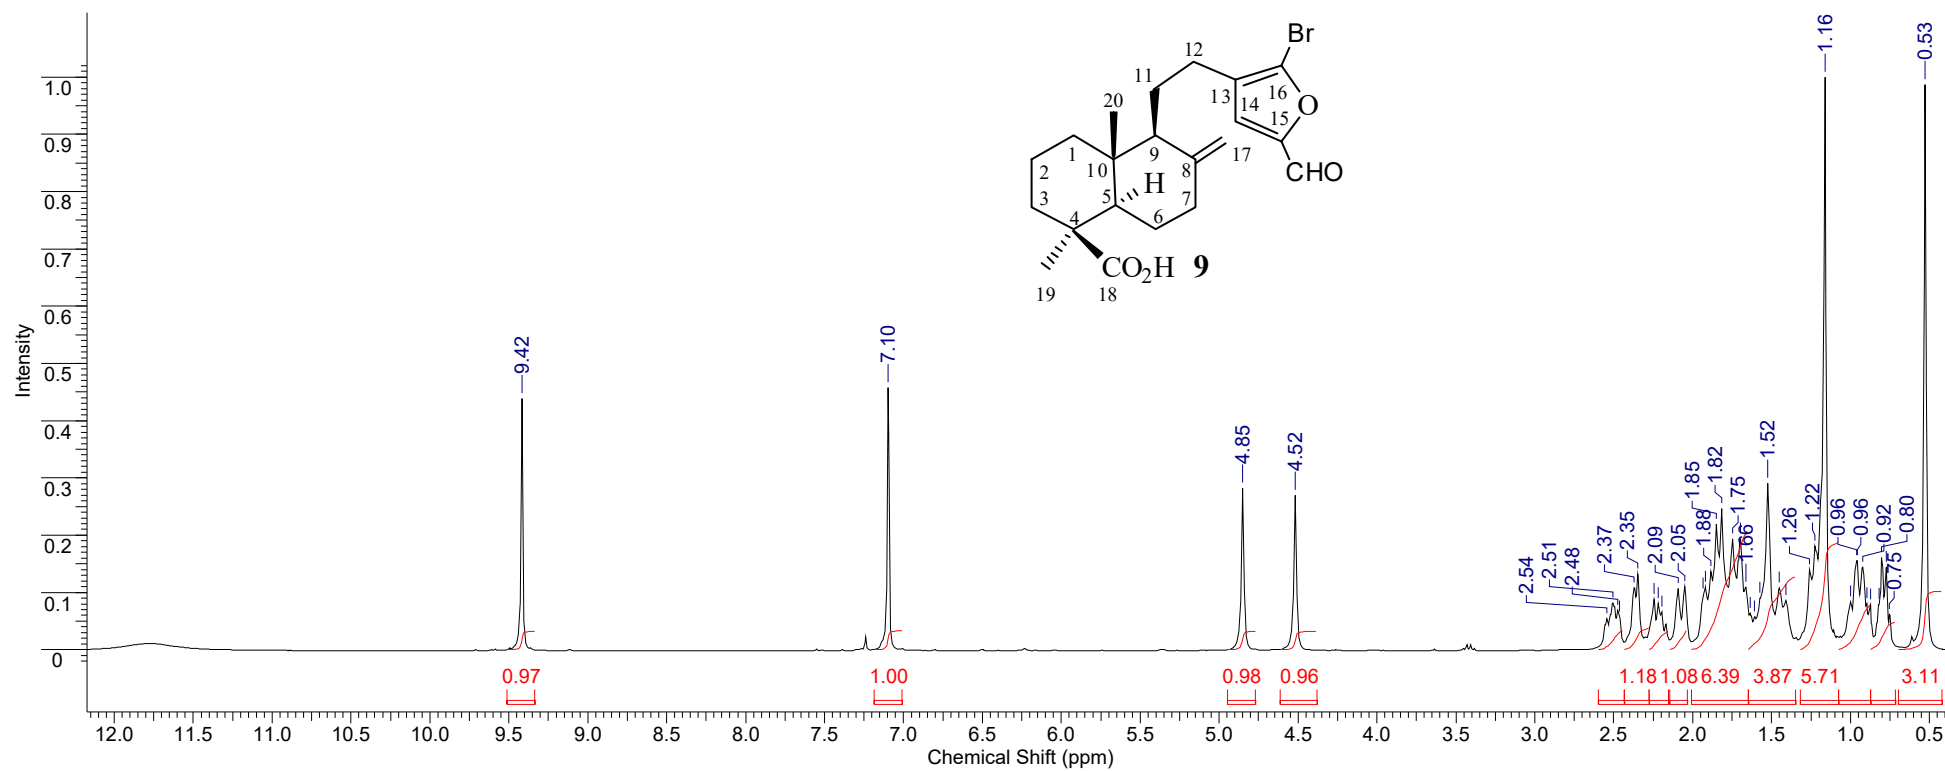



***(1S,4aR,5S,8aR)-5-(2-(2-bromo-5-formylfuran-3-yl)ethyl)-1,4a-dimethyl-6-methylenedecahydronaphthalene-1-carboxylic acid (9)***

(<sup>13</sup>C NMR, 126 MHz, CDCl<sub>3</sub>)

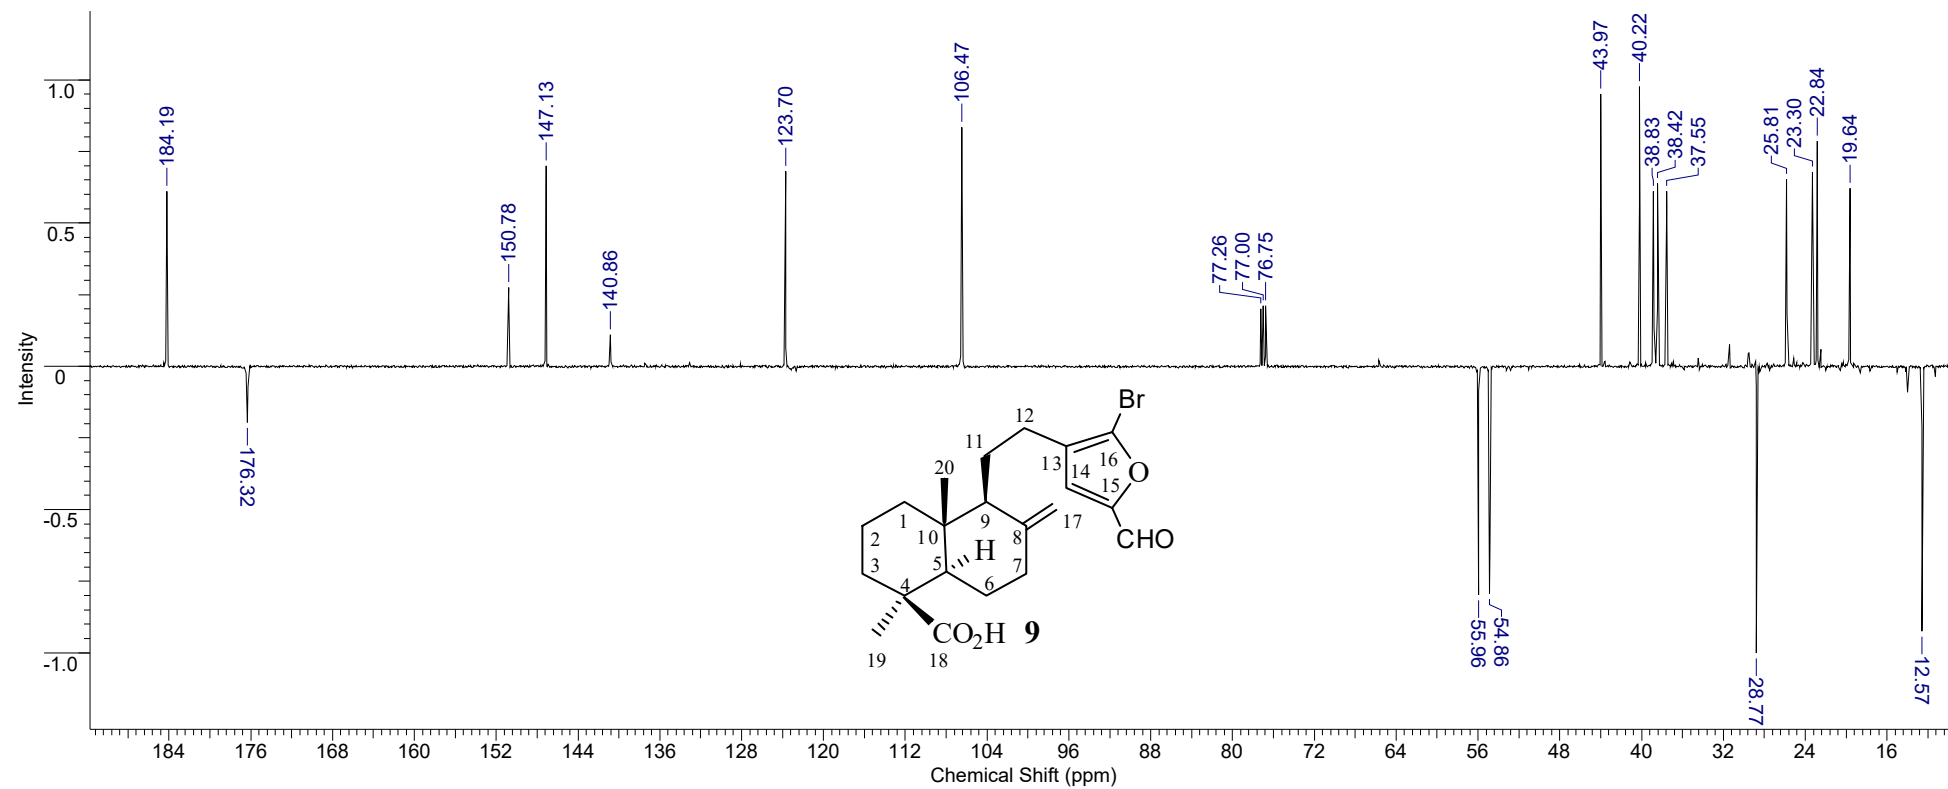

***(1S,4aR,5S,8aR)*-5-(2-(2-bromo-5-cyanofuran-3-yl)ethyl)-1,4a-dimethyl-6-methylenedecahydronaphthalene-1-carboxylic acid (10)**

(<sup>1</sup>H NMR, 300 MHz, CDCl<sub>3</sub>)

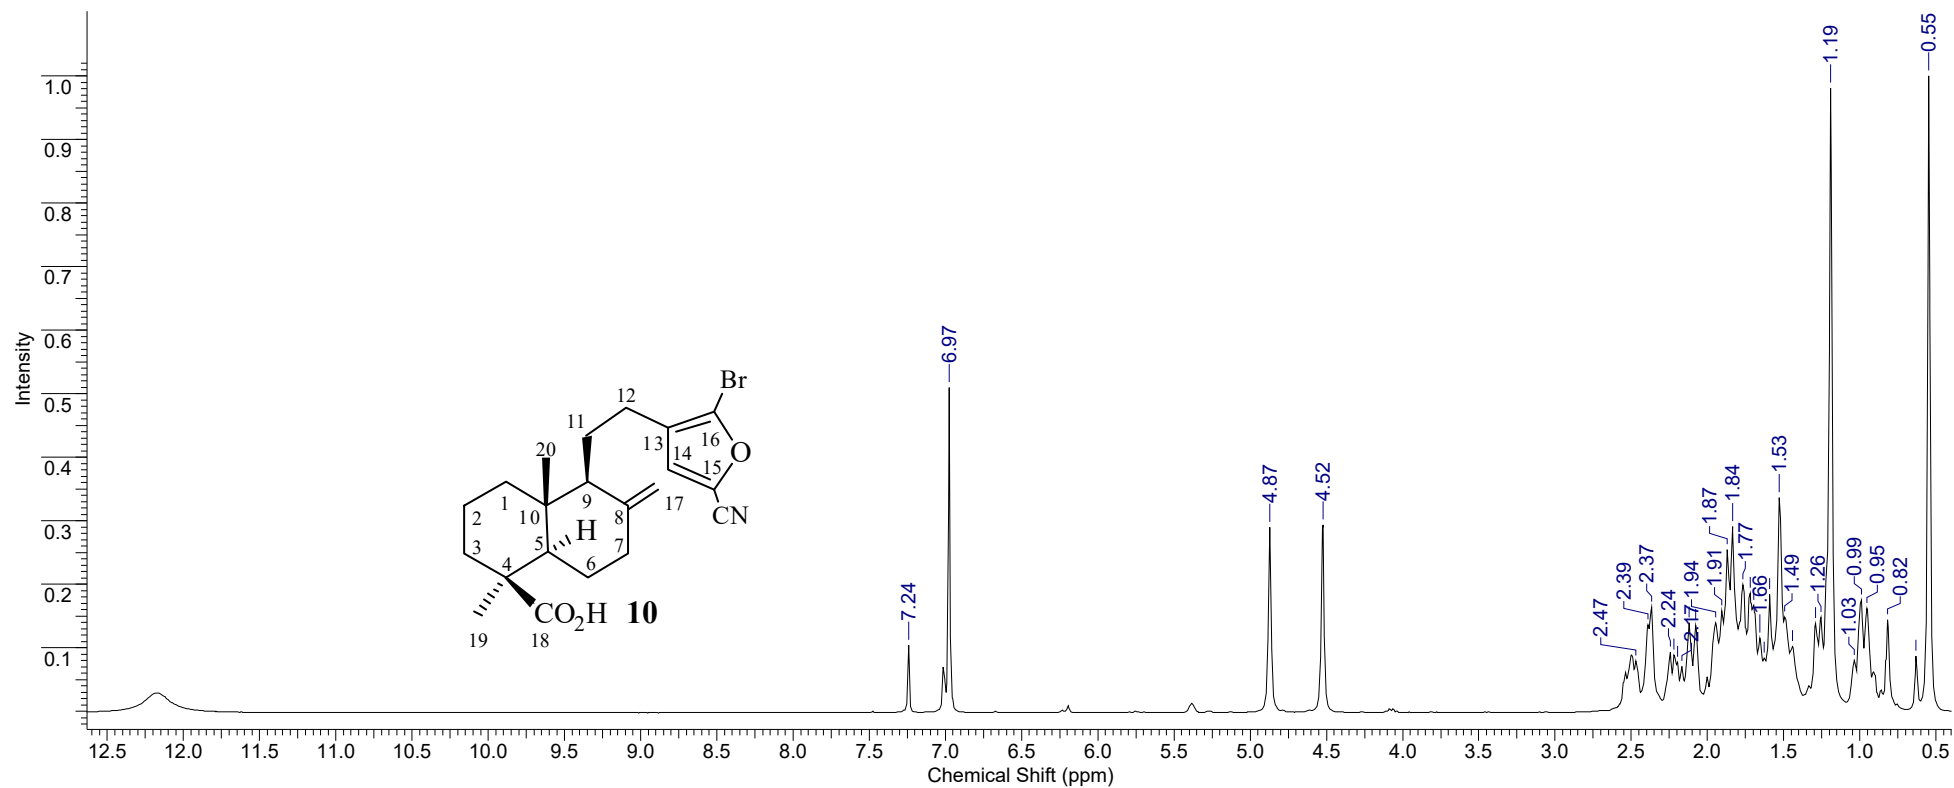

***(1S,4aR,5S,8aR)-5-(2-(2-bromo-5-cyanofuran-3-yl)ethyl)-1,4a-dimethyl-6-methylenedecahydronaphthalene-1-carboxylic acid (10)***

(<sup>13</sup>C NMR, 75 MHz, CDCl<sub>3</sub>)

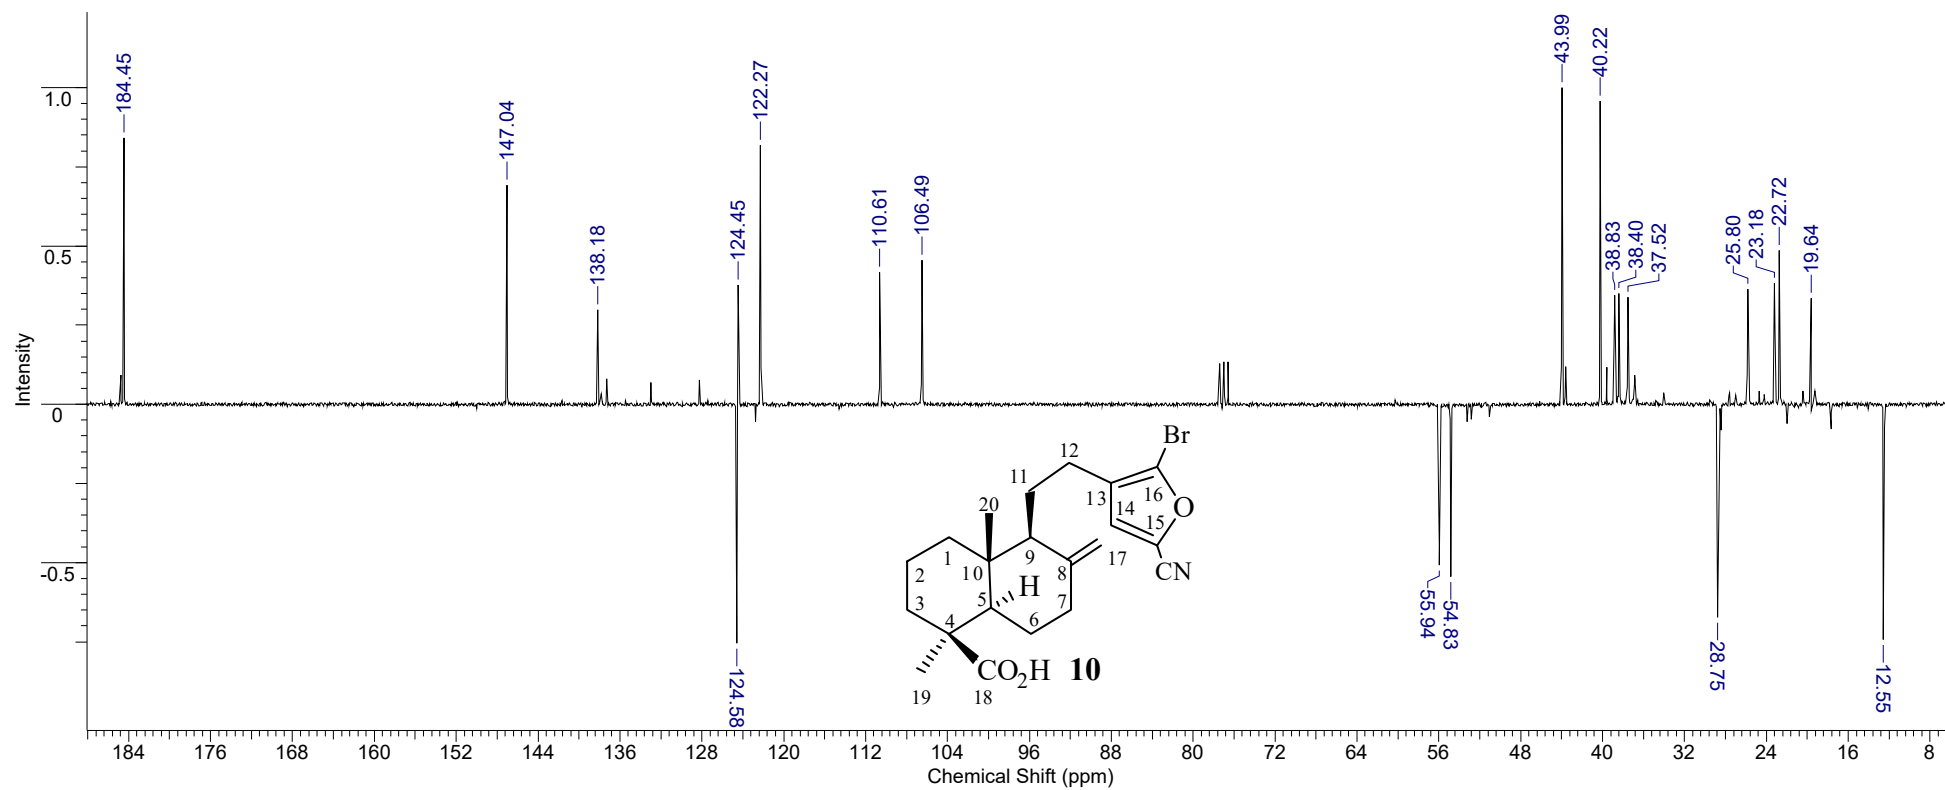

***(1S,4aR,5S,8aR)*-5-(2-(2-bromo-5-(hydroxymethyl)furan-3-yl)ethyl)-1,4a-dimethyl-6-methylenedecahydronaphthalene-1-carboxylic acid (**11**)**

(<sup>1</sup>H NMR, 300 MHz, CDCl<sub>3</sub>)

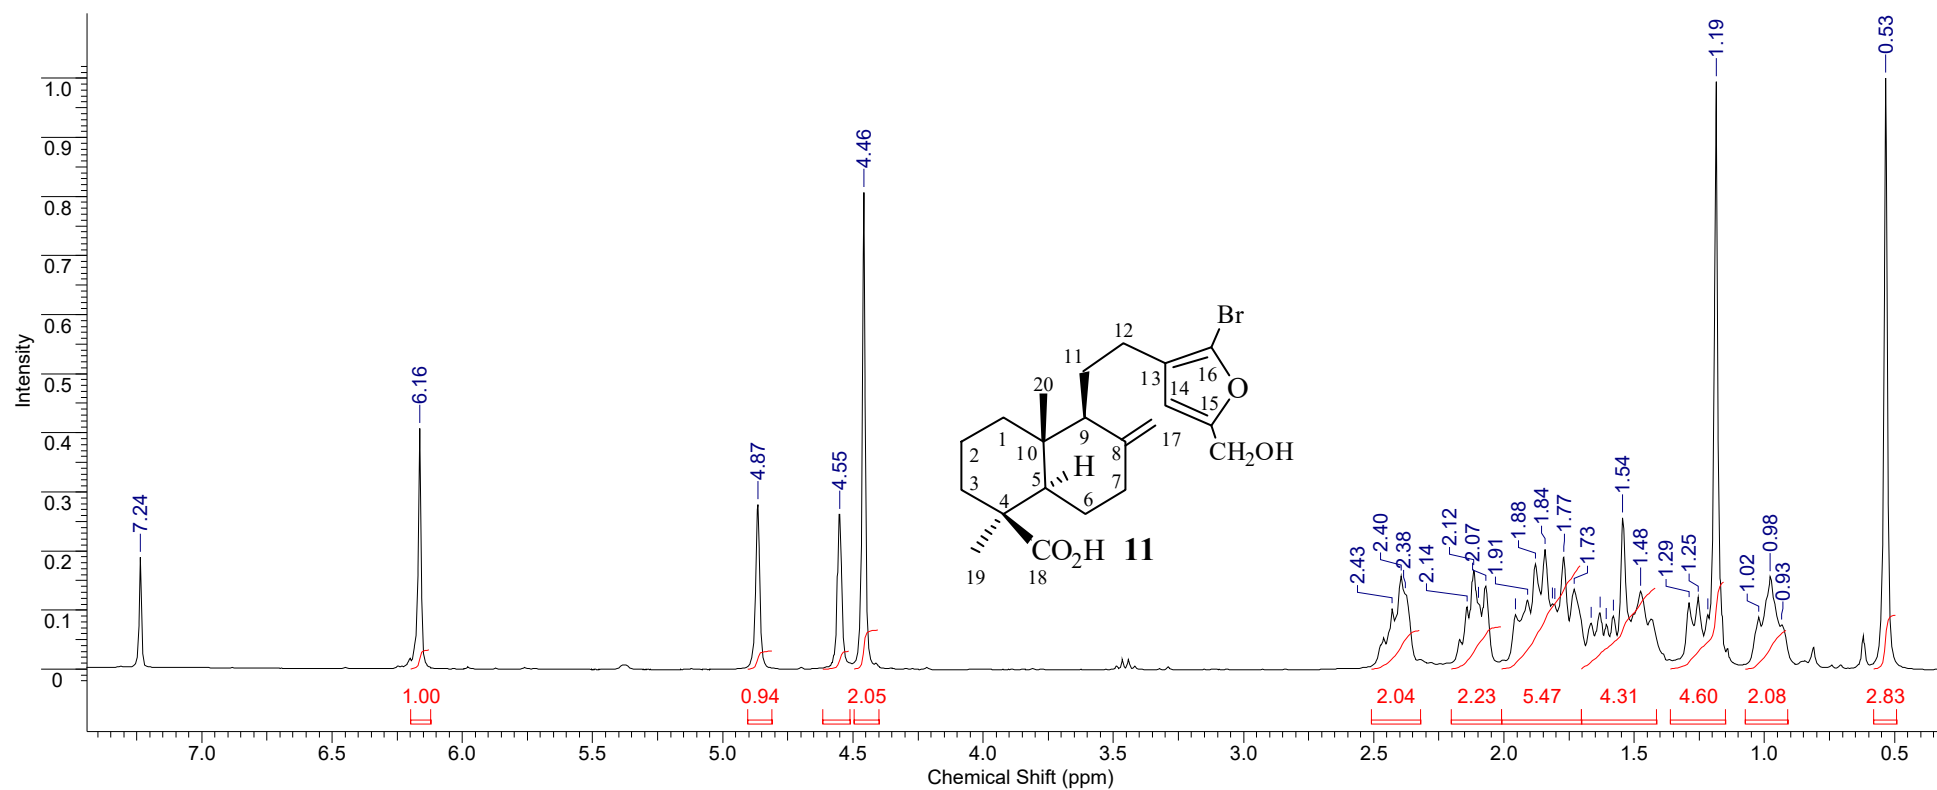

***(1S,4aR,5S,8aR)-5-(2-(2-bromo-5-(hydroxymethyl)furan-3-yl)ethyl)-1,4a-dimethyl-6-methylenedecahydronaphthalene-1-carboxylic acid (11)***

( $^{13}\text{C}$  NMR, 126 MHz,  $\text{CDCl}_3$ )

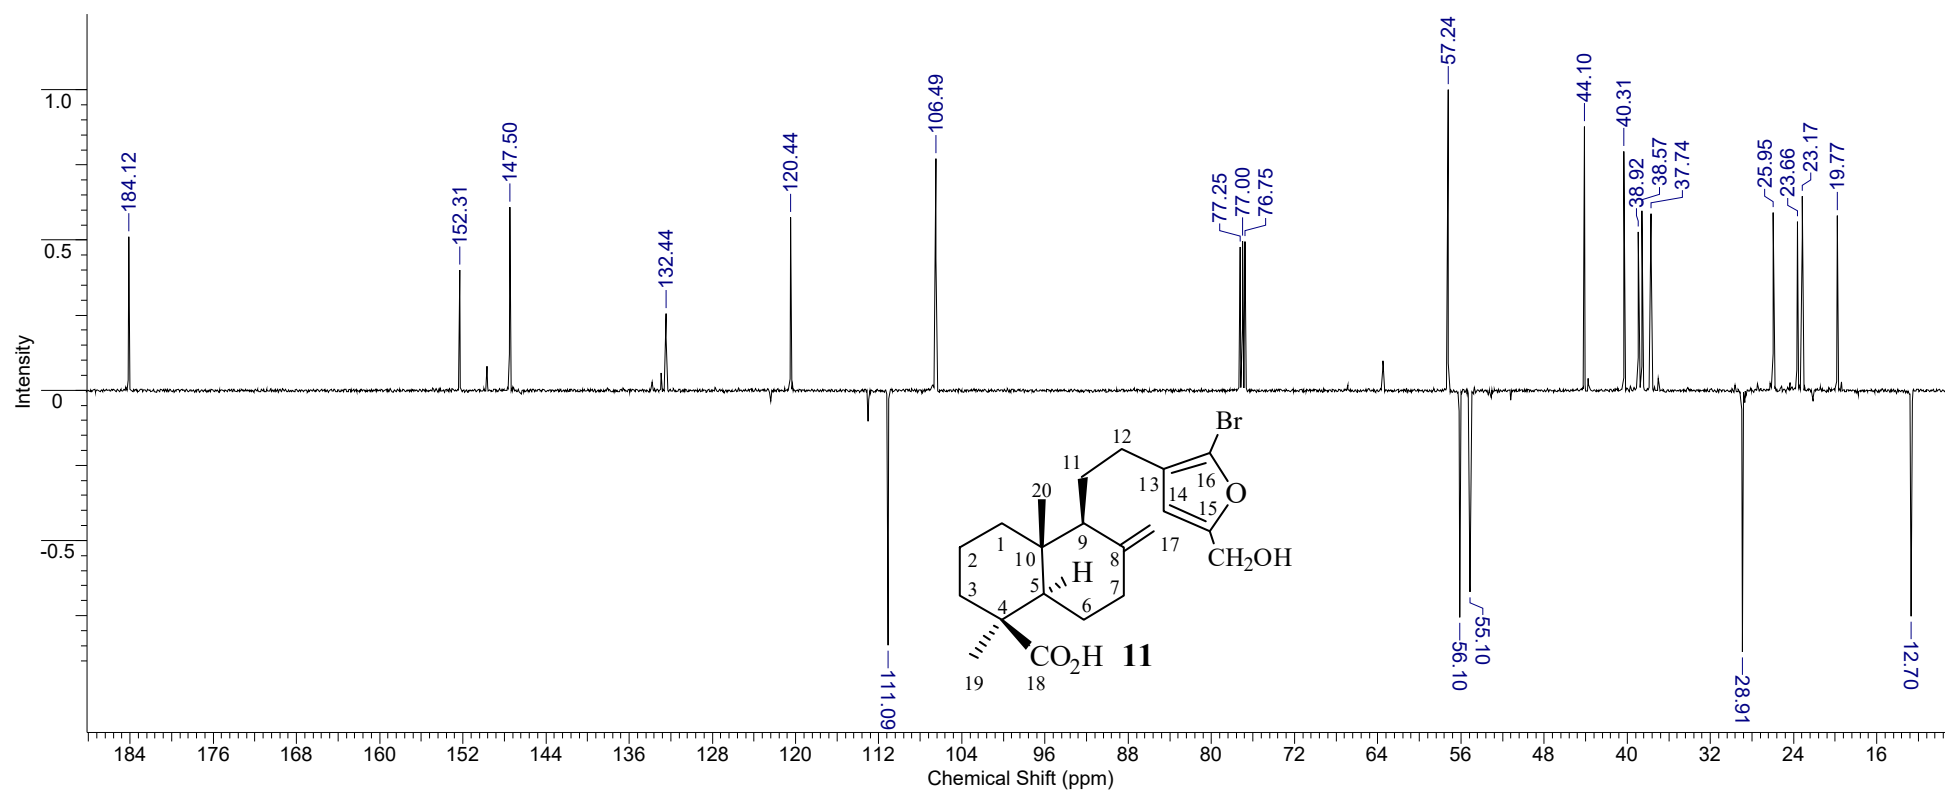

**(1*S*,4*aR*,5*S*,8*aR*)-5-(2-(2-bromo-5-((methylamino)methyl)furan-3-yl)ethyl)-1,4*a*-dimethyl-6-methylenedecahydronaphthalene-1-carboxylic acid**

**(12)** (<sup>1</sup>H NMR, 500 MHz, CDCl<sub>3</sub>)

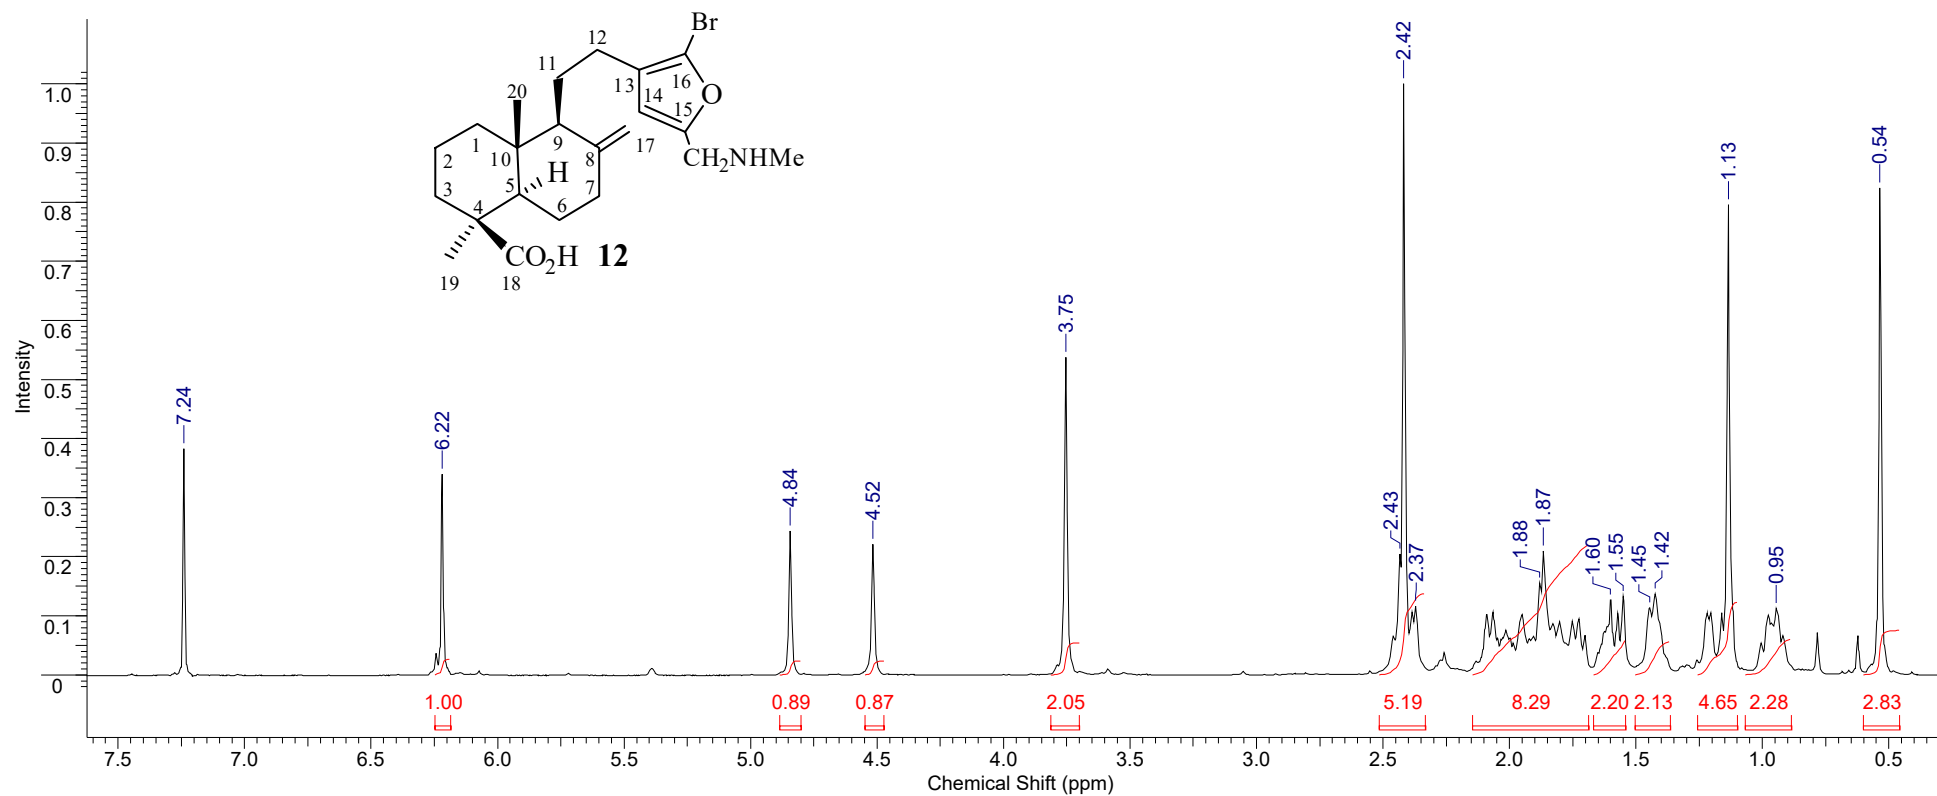

**(1*S*,4*aR*,5*S*,8*aR*)-5-(2-(2-bromo-5-((methylamino)methyl)furan-3-yl)ethyl)-1,4*a*-dimethyl-6-methylenedecahydronaphthalene-1-carboxylic acid**  
**(12)** ( $^{13}\text{C}$  NMR, 75 MHz,  $\text{CDCl}_3$ )

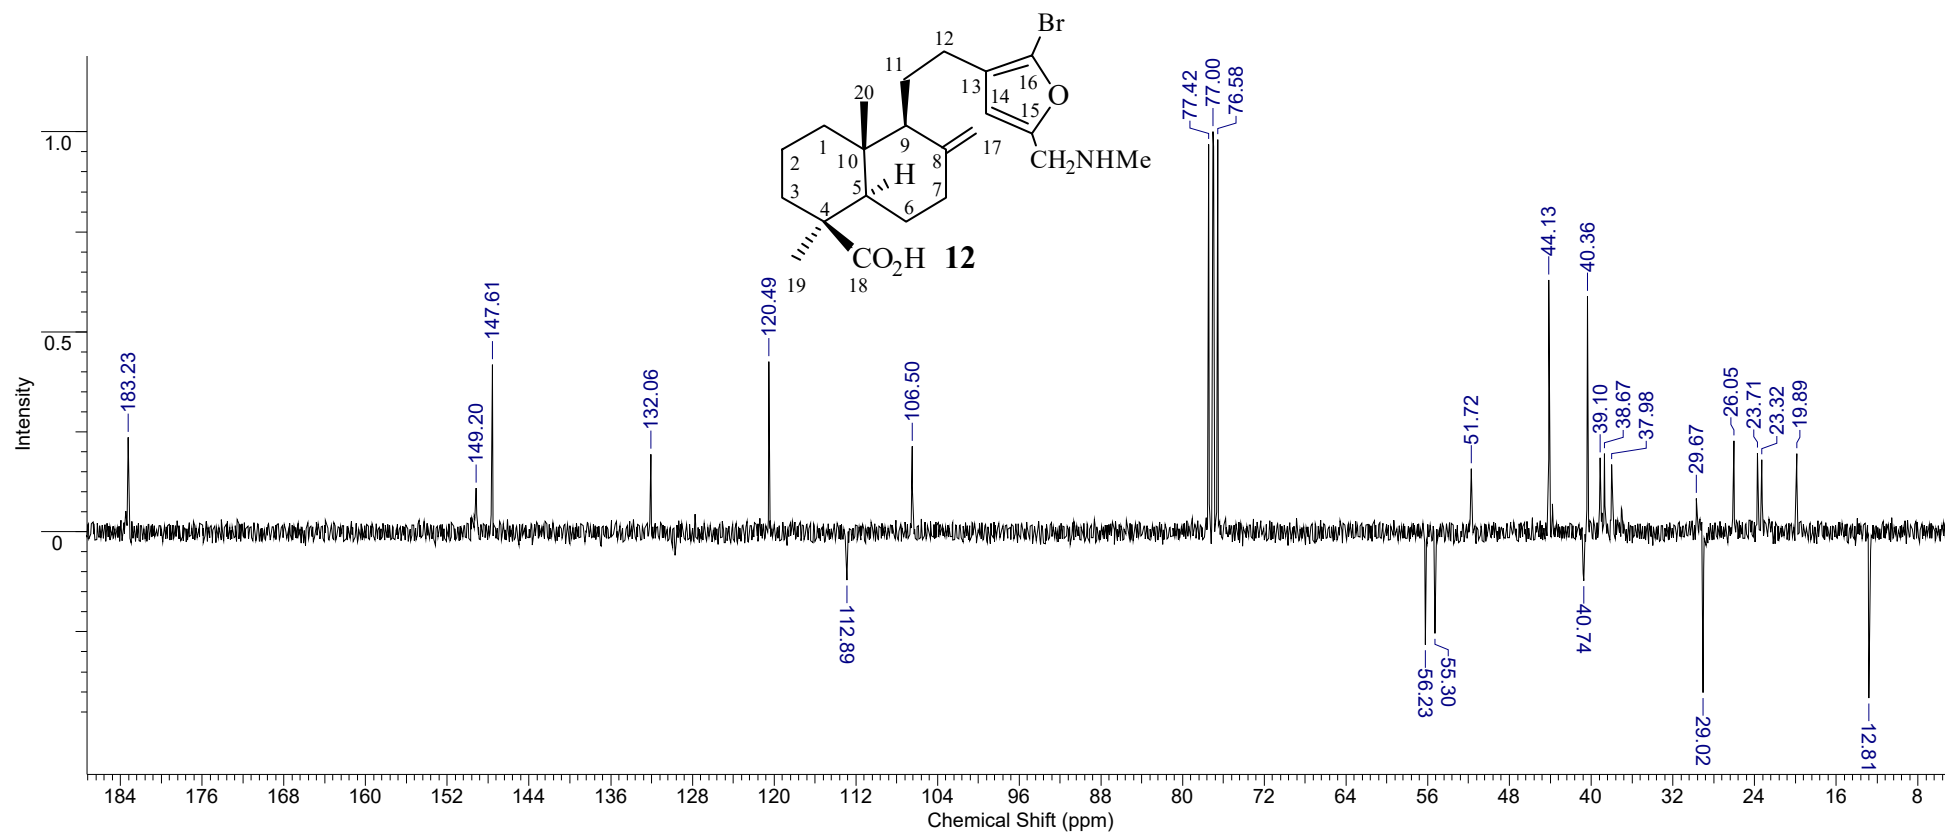

**(1*S*,4*aR*,5*S*,8*aR*)-5-(2-(5-formyl-2-phenylfuran-3-yl)ethyl)-1,4*a*-dimethyl-6-methylenedecahydronaphthalene-1-carboxylic acid (13a)**

(<sup>1</sup>H NMR, 500 MHz, CDCl<sub>3</sub>)

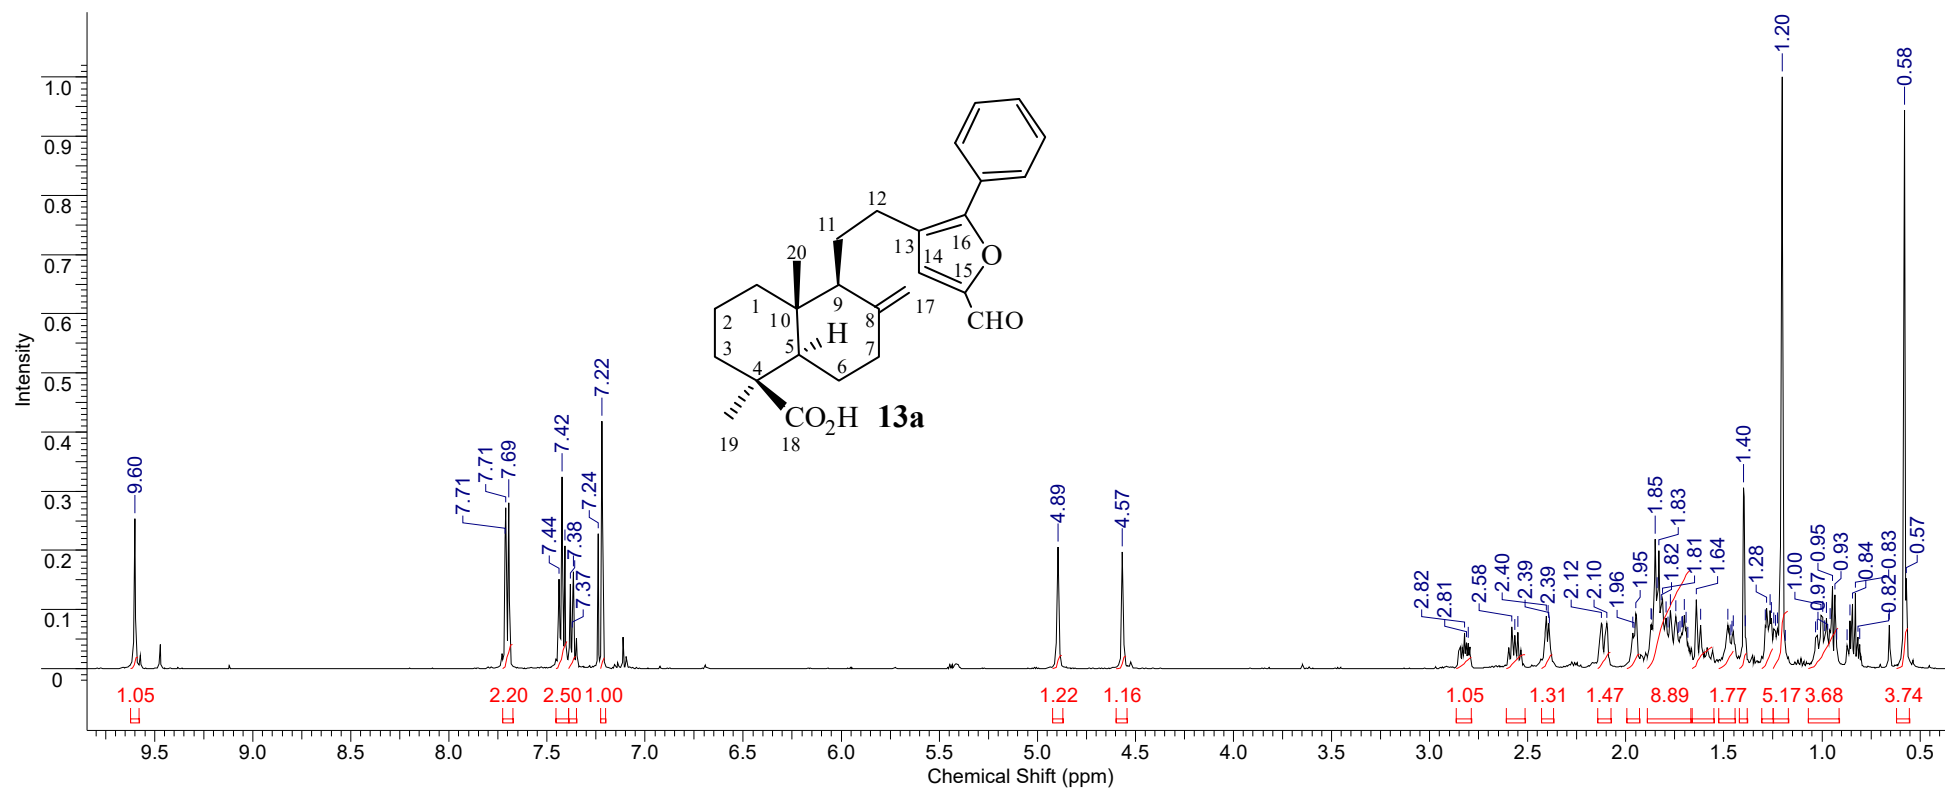



**(1*S*,4*aR*,5*S*,8*aR*)-5-(2-(5-formyl-2-phenylfuran-3-yl)ethyl)-1,4*a*-dimethyl-6-methylenedecahydronaphthalene-1-carboxylic acid (13a)**

(<sup>13</sup>C NMR, 151 MHz, CDCl<sub>3</sub>)

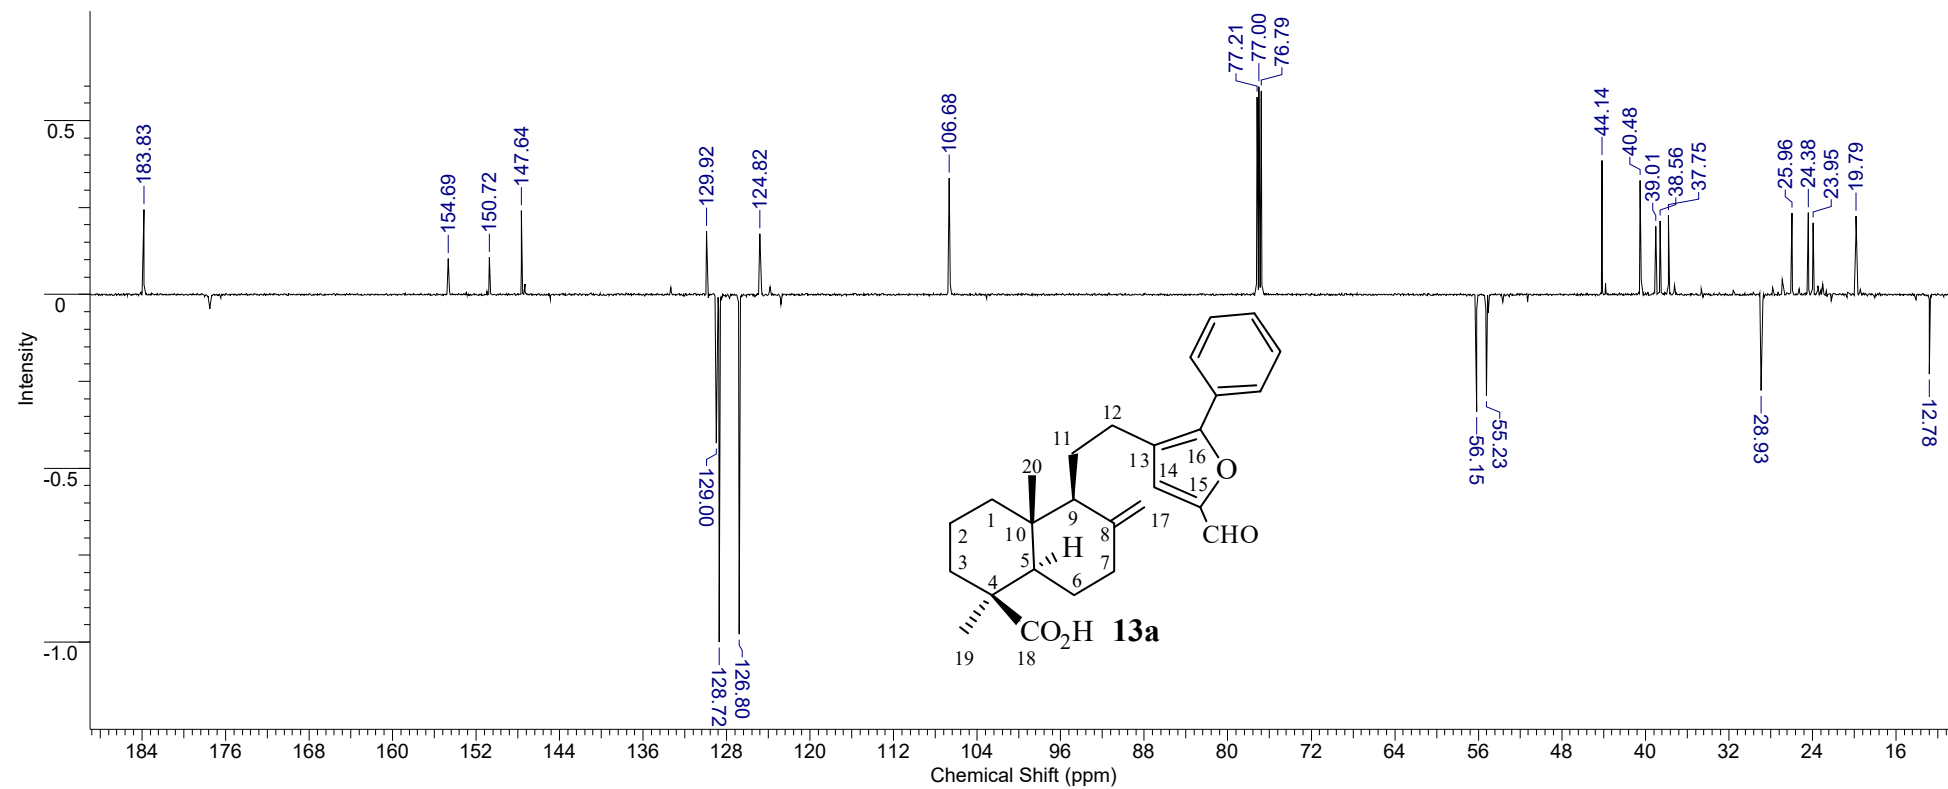

**(1*S*,4*aR*,5*S*,8*aR*)-5-(2-(2-(4-cyanophenyl)-5-formylfuran-3-yl)ethyl)-1,4*a*-dimethyl-6-methylenedecahydronaphthalene-1-carboxylic acid (13b)**

(<sup>1</sup>H NMR, 300 MHz, CDCl<sub>3</sub>)

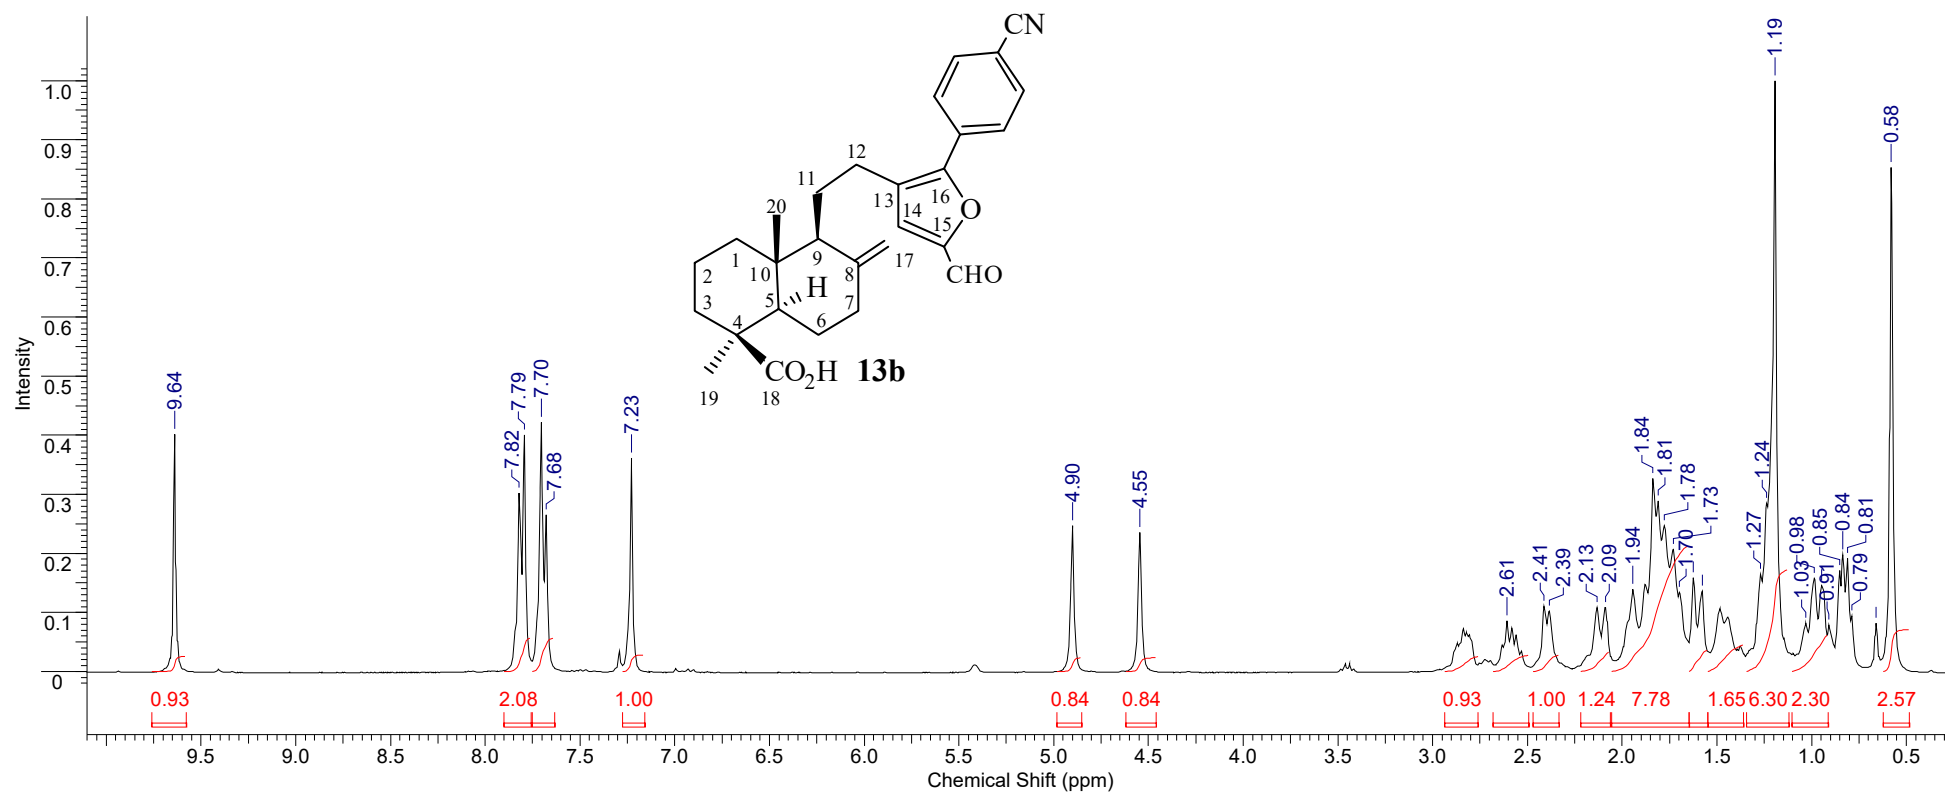

**(1*S*,4*aR*,5*S*,8*aR*)-5-(2-(2-(4-cyanophenyl)-5-formylfuran-3-yl)ethyl)-1,4*a*-dimethyl-6-methylenedecahydronaphthalene-1-carboxylic acid (13b)**

(<sup>13</sup>C NMR, 101 MHz, CDCl<sub>3</sub>)

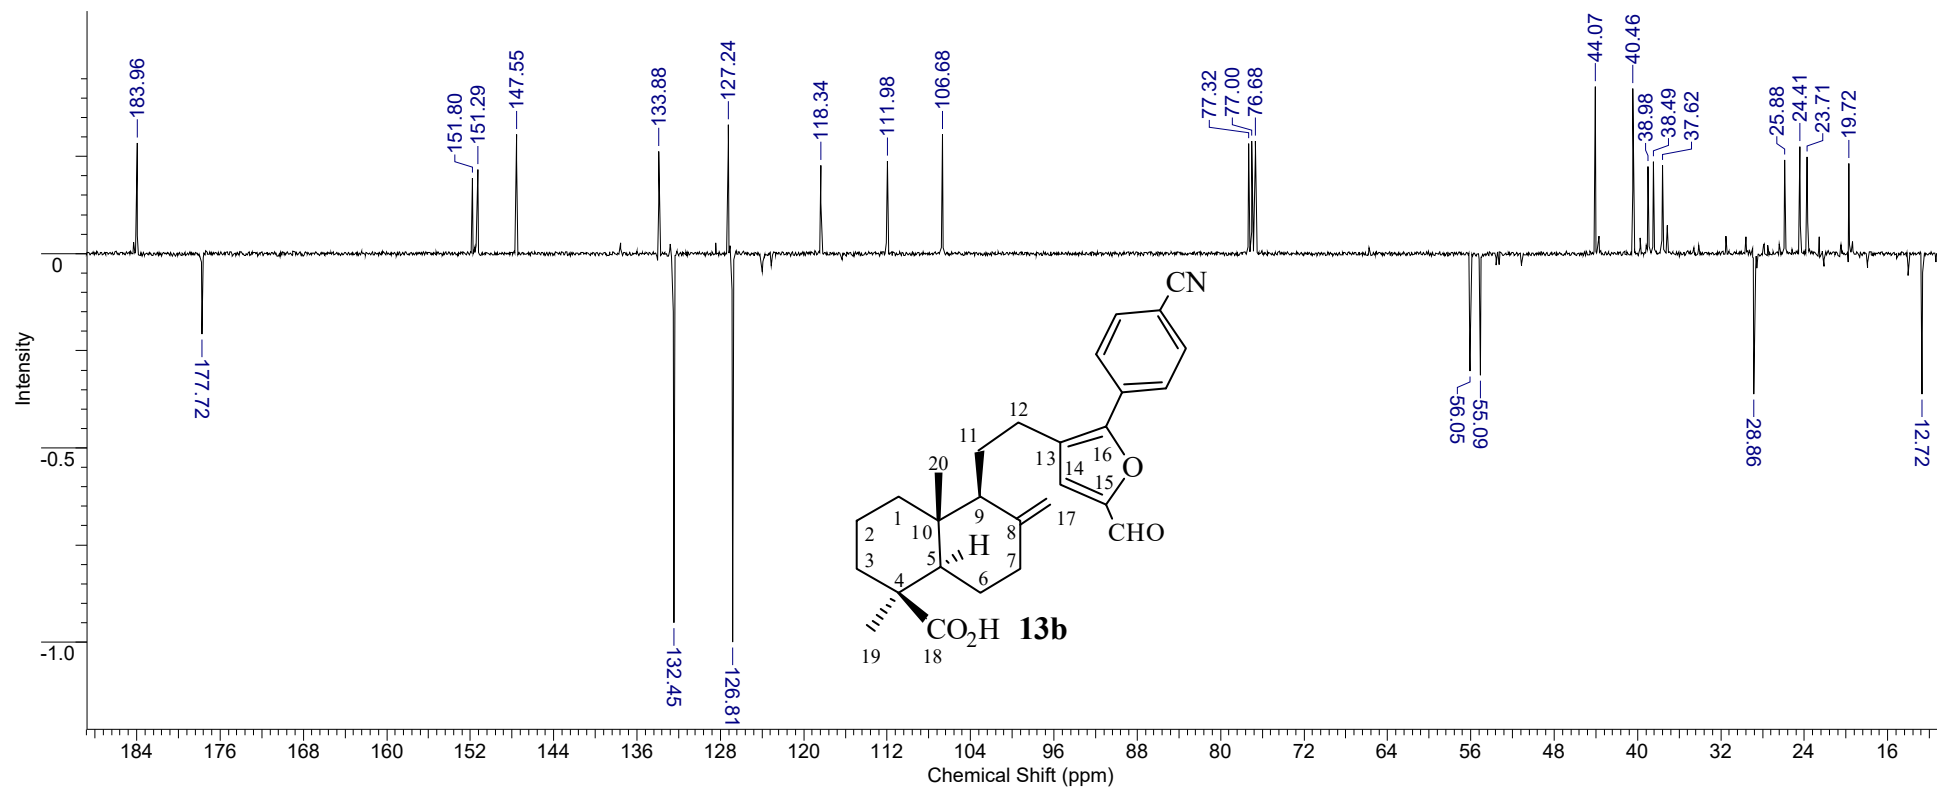

***(1S,4aR,5S,8aR)-5-(2-(5-formyl-2-(3,4,5-trimethoxyphenyl)furan-3-yl)ethyl)-1,4a-dimethyl-6-methylenedecahydronaphthalene-1-carboxylic acid***

***(13c)*** ( $^1\text{H}$  NMR, 400 MHz,  $\text{CDCl}_3$ )

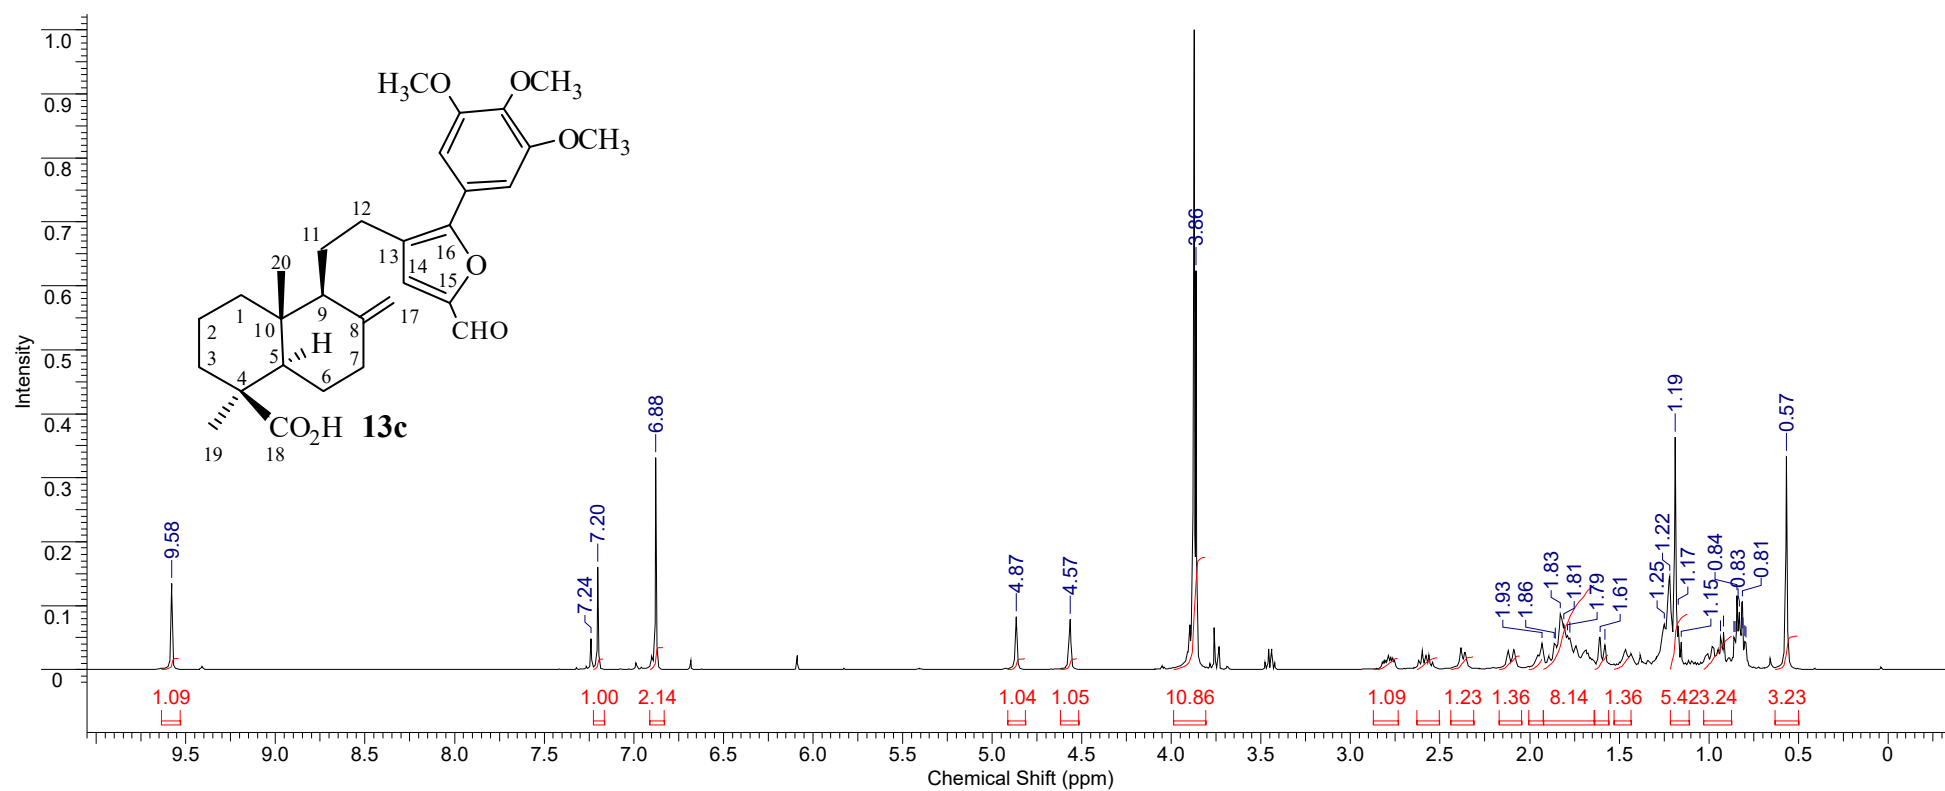

*(1S,4aR,5S,8aR)-5-(2-(5-formyl-2-(3,4,5-trimethoxyphenyl)furan-3-yl)ethyl)-1,4a-dimethyl-6-methylenedecahydronaphthalene-1-carboxylic acid*  
*(13c)* (<sup>13</sup>C NMR, 126 MHz, CDCl<sub>3</sub>)

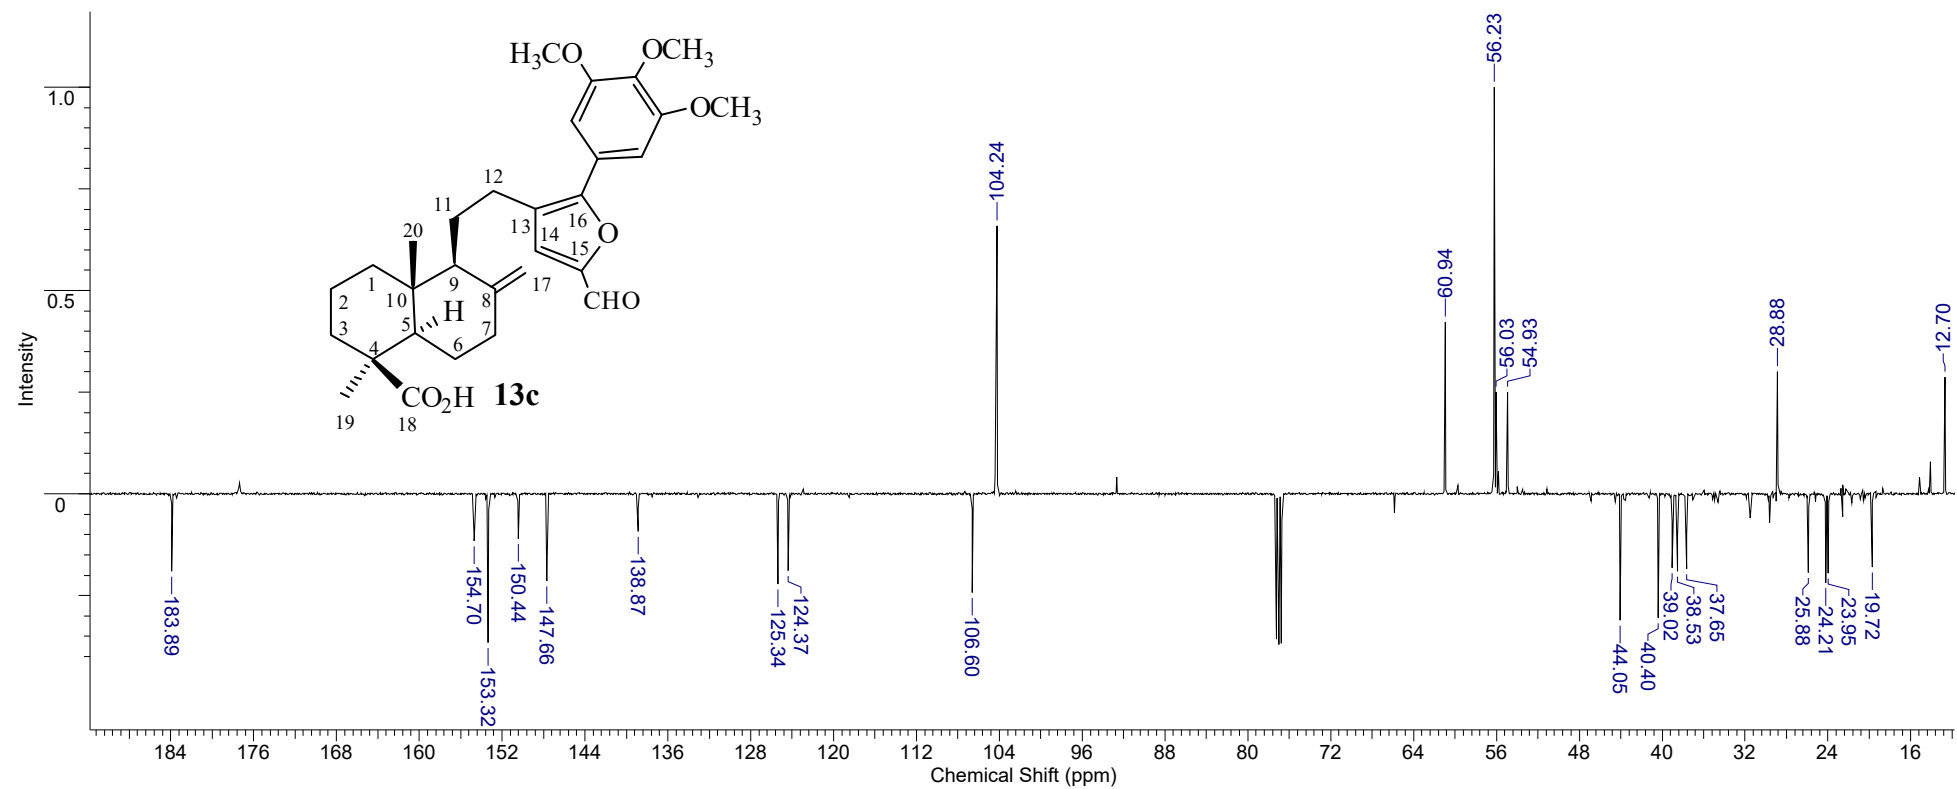

**(1*S*,4*aR*,5*S*,8*aR*)-5-(2-(5-cyano-2-phenylfuran-3-yl)ethyl)-1,4*a*-dimethyl-6-methylenedecahydronaphthalene-1-carboxylic acid (**14a**)** (<sup>1</sup>H NMR, 400 MHz, CDCl<sub>3</sub>)

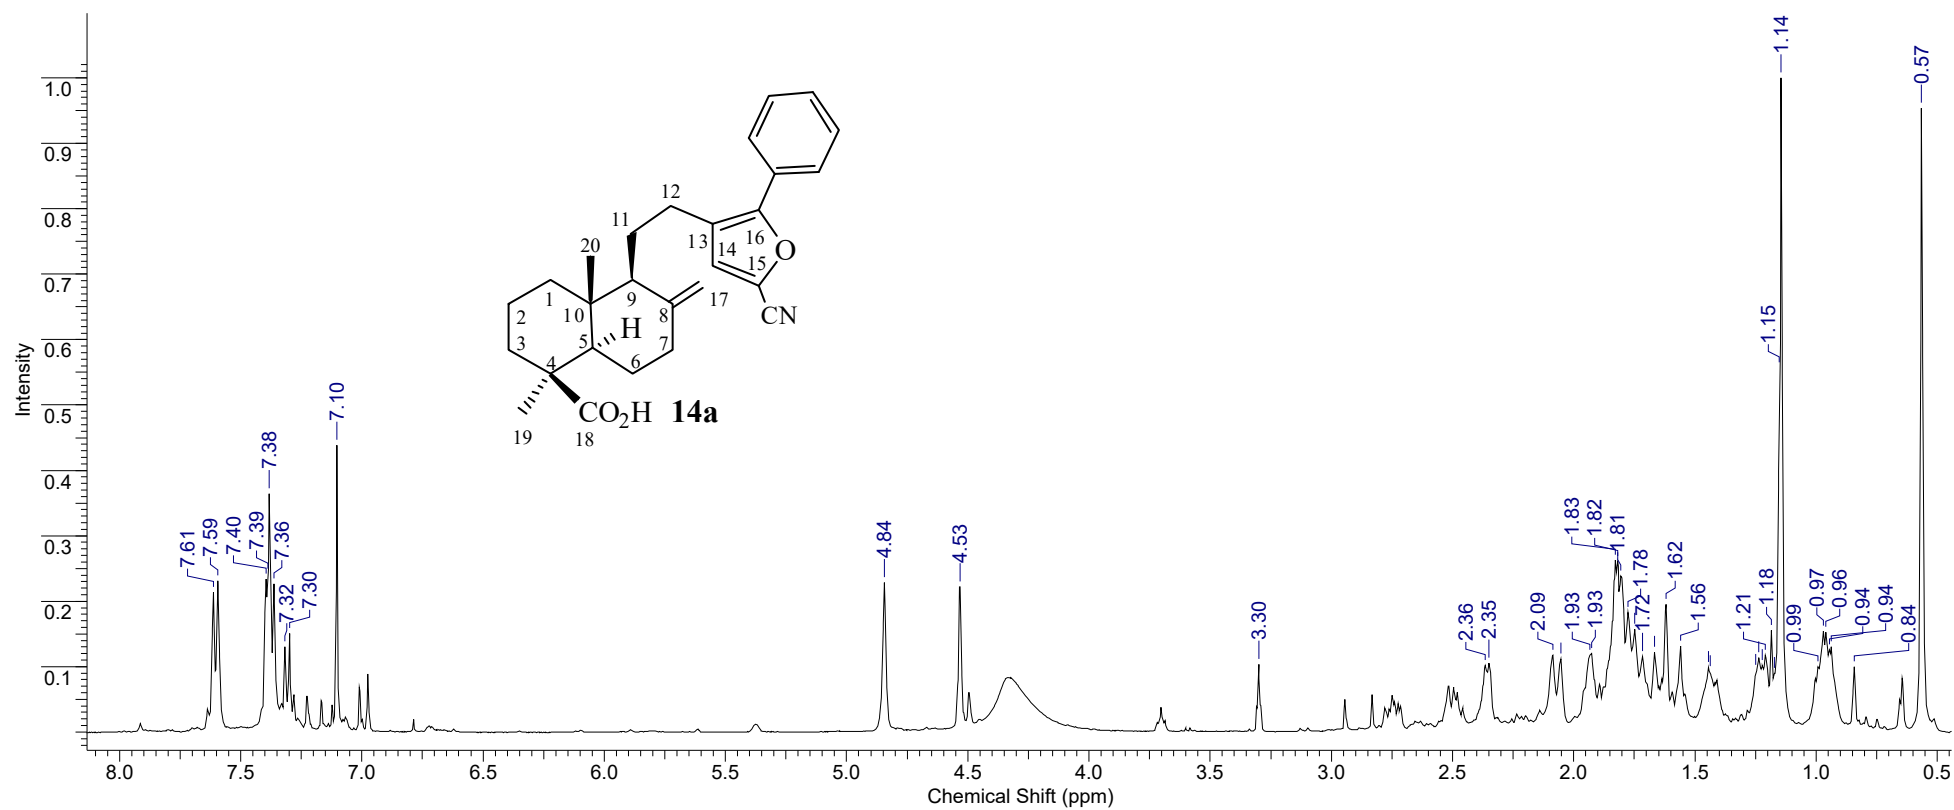

***(1S,4aR,5S,8aR)-5-(2-(5-cyano-2-phenylfuran-3-yl)ethyl)-1,4a-dimethyl-6-methylenedecahydronaphthalene-1-carboxylic acid (14a)***

(<sup>13</sup>C NMR, 126 MHz, CDCl<sub>3</sub>)

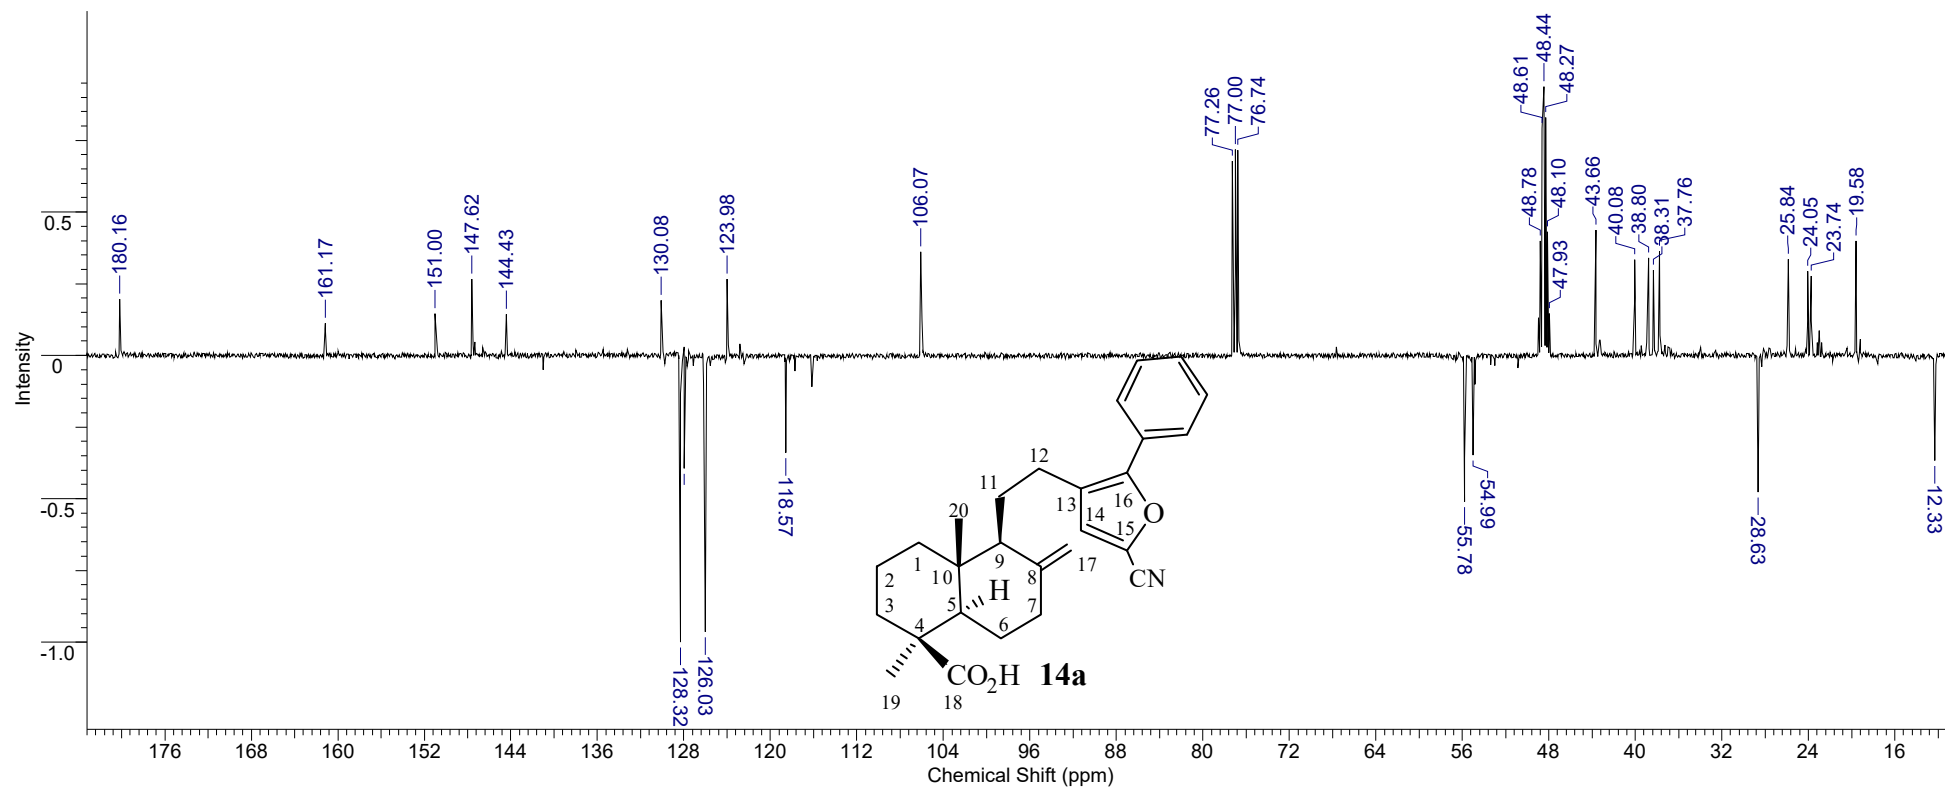

Supplement: s1 [file s1]
